# Supplementary material for: Complete genome analysis of a virulent Vibrio scophthalmi strain VSc190401 isolated from diseased marine fish half-smooth tongue sole, Cynoglossus semilaevis
Source: BMC Microbiol. 2020 Nov 11;20:341. doi: 10.1186/s12866-020-02028-7 (PMC7661262; doi:10.1186/s12866-020-02028-7)
Supplement: Supplementary file 3 — Additional file 3: Table S1. The COG functional annotation information. [file 12866_2020_2028_MOESM3_ESM.xls]

## Sheet: 基因与COG对应关系详情表
Gene ID	Location	COG ID	COG Description	COG Type Description	COG Type	COG Category
gene0001	Chr1	COG0593	it binds specifically double-stranded DNA at a 9 bp consensus (dnaA box) 5'-TTATC CA A CA A-3'. DnaA binds to ATP and to acidic phospholipids (By similarity)	Replication, recombination and repair	L	INFORMATION STORAGE AND PROCESSING
gene0002	Chr1	COG0592	DNA polymerase processivity factor activity	Replication, recombination and repair	L	INFORMATION STORAGE AND PROCESSING
gene0003	Chr1	COG1195	it is required for DNA replication and normal SOS inducibility. RecF binds preferentially to single-stranded, linear DNA. It also seems to bind ATP (By similarity)	Replication, recombination and repair	L	INFORMATION STORAGE AND PROCESSING
gene0004	Chr1	COG0187	DNA gyrase negatively supercoils closed circular double- stranded DNA in an ATP-dependent manner and also catalyzes the interconversion of other topological isomers of double-stranded DNA rings, including catenanes and knotted rings (By similarity)	Replication, recombination and repair	L	INFORMATION STORAGE AND PROCESSING
gene2459	Chr1	COG0187	DNA gyrase negatively supercoils closed circular double- stranded DNA in an ATP-dependent manner and also catalyzes the interconversion of other topological isomers of double-stranded DNA rings, including catenanes and knotted rings (By similarity)	Replication, recombination and repair	L	INFORMATION STORAGE AND PROCESSING
gene0006	Chr1	COG0071	response to heat	Post-translational modification, protein turnover, chaperones	O	CELLULAR PROCESSES AND SIGNALING
gene1724	Chr1	COG0071	response to heat	Post-translational modification, protein turnover, chaperones	O	CELLULAR PROCESSES AND SIGNALING
gene0007	Chr1	COG3977	Valine--pyruvate aminotransferase	Amino acid transport and metabolism	E	METABOLISM
gene0009	Chr1	COG0751	Glycyl-tRNA synthetase beta subunit	Translation, ribosomal structure and biogenesis	J	INFORMATION STORAGE AND PROCESSING
gene0010	Chr1	COG0752	glycyl-tRNA synthetase, alpha subunit	Translation, ribosomal structure and biogenesis	J	INFORMATION STORAGE AND PROCESSING
gene0011	Chr1	COG0747	Extracellular solute-binding protein, family 5	Amino acid transport and metabolism	E	METABOLISM
gene0483	Chr1	COG0747	Extracellular solute-binding protein, family 5	Amino acid transport and metabolism	E	METABOLISM
gene2985	Chr1	COG0747	Extracellular solute-binding protein, family 5	Amino acid transport and metabolism	E	METABOLISM
gene0013	Chr1	COG0425	sulfurtransferase activity	Post-translational modification, protein turnover, chaperones	O	CELLULAR PROCESSES AND SIGNALING
gene0014	Chr1	ENOG4111MUG	LysR family (Transcriptional regulator	Transcription	K	INFORMATION STORAGE AND PROCESSING
gene0015	Chr1	COG0604	alcohol dehydrogenase	Energy production and conversion	C	METABOLISM
gene1465	Chr1	COG0604	alcohol dehydrogenase	Energy production and conversion	C	METABOLISM
gene2599	Chr1	COG0604	alcohol dehydrogenase	Energy production and conversion	C	METABOLISM
gene0016	Chr1	COG1171	Threonine dehydratase	Amino acid transport and metabolism	E	METABOLISM
gene0017	Chr1	COG0129	Dihydroxy-acid dehydratase	Amino acid transport and metabolism	E	METABOLISM
gene3021	Chr1	COG0129	Dihydroxy-acid dehydratase	Amino acid transport and metabolism	E	METABOLISM
gene0018	Chr1	COG0115	brancheD-chain amino acid aminotransferase	Amino acid transport and metabolism	E	METABOLISM
gene1049	Chr1	COG0115	brancheD-chain amino acid aminotransferase	Amino acid transport and metabolism	E	METABOLISM
gene0019	Chr1	COG3978	Acetolactate synthase	Amino acid transport and metabolism	E	METABOLISM
gene0020	Chr1	COG0028	acetolactate synthase	Amino acid transport and metabolism	E	METABOLISM
gene2564	Chr1	COG0028	acetolactate synthase	Amino acid transport and metabolism	E	METABOLISM
gene0021	Chr1	COG0606	Mg chelatase subunit ChlI	Post-translational modification, protein turnover, chaperones	O	CELLULAR PROCESSES AND SIGNALING
gene2392	Chr1	COG0606	Mg chelatase subunit ChlI	Post-translational modification, protein turnover, chaperones	O	CELLULAR PROCESSES AND SIGNALING
gene0022	Chr1	ENOG41123UP	Protein of unknown function (DUF2860)	Function unknown	S	POORLY CHARACTERIZED
gene1711	Chr1	ENOG41123UP	Protein of unknown function (DUF2860)	Function unknown	S	POORLY CHARACTERIZED
gene0023	Chr1	COG0526	Thioredoxin	Post-translational modification, protein turnover, chaperones	O	CELLULAR PROCESSES AND SIGNALING
gene1204	Chr1	COG0526	Thioredoxin	Post-translational modification, protein turnover, chaperones	O	CELLULAR PROCESSES AND SIGNALING
gene1520	Chr1	COG0526	Thioredoxin	Post-translational modification, protein turnover, chaperones	O	CELLULAR PROCESSES AND SIGNALING
gene2013	Chr1	COG0526	Thioredoxin	Post-translational modification, protein turnover, chaperones	O	CELLULAR PROCESSES AND SIGNALING
gene2088	Chr1	COG0526	Thioredoxin	Post-translational modification, protein turnover, chaperones	O	CELLULAR PROCESSES AND SIGNALING
gene2172	Chr1	COG0526	Thioredoxin	Post-translational modification, protein turnover, chaperones	O	CELLULAR PROCESSES AND SIGNALING
gene2957	Chr1	COG0526	Thioredoxin	Post-translational modification, protein turnover, chaperones	O	CELLULAR PROCESSES AND SIGNALING
gene0024	Chr1	COG2334	Homoserine Kinase	Function unknown	S	POORLY CHARACTERIZED
gene0025	Chr1	COG0348	4Fe-4S Ferredoxin iron-sulfur binding domain protein	Energy production and conversion	C	METABOLISM
gene0026	Chr1	COG3084	conserved protein	Function unknown	S	POORLY CHARACTERIZED
gene0028	Chr1	COG4326	spoom family	Function unknown	S	POORLY CHARACTERIZED
gene1606	Chr1	COG4326	spoom family	Function unknown	S	POORLY CHARACTERIZED
gene0029	Chr1	COG1272	Channel protein (Hemolysin III family	Function unknown	S	POORLY CHARACTERIZED
gene0030	Chr1	COG0168	Low-affinity potassium transport system. Interacts with Trk system potassium uptake protein TrkA (By similarity)	Inorganic ion transport and metabolism	P	METABOLISM
gene3056	Chr1	COG0168	Low-affinity potassium transport system. Interacts with Trk system potassium uptake protein TrkA (By similarity)	Inorganic ion transport and metabolism	P	METABOLISM
gene0031	Chr1	COG0569	Potassium uptake protein	Inorganic ion transport and metabolism	P	METABOLISM
gene0032	Chr1	COG0144	nOP2 Sun	Translation, ribosomal structure and biogenesis	J	INFORMATION STORAGE AND PROCESSING
gene1533	Chr1	COG0144	nOP2 Sun	Translation, ribosomal structure and biogenesis	J	INFORMATION STORAGE AND PROCESSING
gene0033	Chr1	COG0223	Modifies the free amino group of the aminoacyl moiety of methionyl-tRNA(fMet). The formyl group appears to play a dual role in the initiator identity of N-formylmethionyl-tRNA by (I) promoting its recognition by IF2 and (II) impairing its binding to EFTu-GTP (By similarity)	Translation, ribosomal structure and biogenesis	J	INFORMATION STORAGE AND PROCESSING
gene0034	Chr1	COG0242	Removes the formyl group from the N-terminal Met of newly synthesized proteins. Requires at least a dipeptide for an efficient rate of reaction. N-terminal L-methionine is a prerequisite for activity but the enzyme has broad specificity at other positions (By similarity)	Translation, ribosomal structure and biogenesis	J	INFORMATION STORAGE AND PROCESSING
gene1235	Chr1	COG0242	Removes the formyl group from the N-terminal Met of newly synthesized proteins. Requires at least a dipeptide for an efficient rate of reaction. N-terminal L-methionine is a prerequisite for activity but the enzyme has broad specificity at other positions (By similarity)	Translation, ribosomal structure and biogenesis	J	INFORMATION STORAGE AND PROCESSING
gene0035	Chr1	COG1652	domain protein	Function unknown	S	POORLY CHARACTERIZED
gene0036	Chr1	COG0758	DNA protecting protein DprA	Replication, recombination and repair	L	INFORMATION STORAGE AND PROCESSING
gene0037	Chr1	COG2922	Protein smg homolog	Function unknown	S	POORLY CHARACTERIZED
gene0038	Chr1	COG0551	DNA topoisomerase type I activity	Replication, recombination and repair	L	INFORMATION STORAGE AND PROCESSING
gene1391	Chr1	COG0551	DNA topoisomerase type I activity	Replication, recombination and repair	L	INFORMATION STORAGE AND PROCESSING
gene2035	Chr1	COG0551	DNA topoisomerase type I activity	Replication, recombination and repair	L	INFORMATION STORAGE AND PROCESSING
gene0039	Chr1	COG0026	phosphoribosylaminoimidazole carboxylase atpase subunit	Nucleotide transport and metabolism	F	METABOLISM
gene0040	Chr1	COG0041	Catalyzes the conversion of N5-carboxyaminoimidazole ribonucleotide (N5-CAIR) to 4-carboxy-5-aminoimidazole ribonucleotide (CAIR) (By similarity)	Nucleotide transport and metabolism	F	METABOLISM
gene0041	Chr1	COG0009	sua5 ycio yrdc ywlc family protein	Translation, ribosomal structure and biogenesis	J	INFORMATION STORAGE AND PROCESSING
gene1228	Chr1	COG0009	sua5 ycio yrdc ywlc family protein	Translation, ribosomal structure and biogenesis	J	INFORMATION STORAGE AND PROCESSING
gene0042	Chr1	COG0408	Key enzyme in heme biosynthesis. Catalyzes the oxidative decarboxylation of propionic acid side chains of rings A and B of coproporphyrinogen III (By similarity)	Coenzyme transport and metabolism	H	METABOLISM
gene0043	Chr1	COG0169	shikimate dehydrogenase	Amino acid transport and metabolism	E	METABOLISM
gene0044	Chr1	ENOG410Y8Q1	Protein of unknown function (DUF1488)	Function unknown	S	POORLY CHARACTERIZED
gene0045	Chr1	COG0663	Transferase	Function unknown	S	POORLY CHARACTERIZED
gene0053	Chr1	COG1816	adenosine deaminase	Nucleotide transport and metabolism	F	METABOLISM
gene0054	Chr1	ENOG410XNMH	Histidine kinase	Signal transduction mechanisms	T	CELLULAR PROCESSES AND SIGNALING
gene0179	Chr1	ENOG410XNMH	Histidine kinase	Signal transduction mechanisms	T	CELLULAR PROCESSES AND SIGNALING
gene0468	Chr1	ENOG410XNMH	Histidine kinase	Signal transduction mechanisms	T	CELLULAR PROCESSES AND SIGNALING
gene0518	Chr1	ENOG410XNMH	Histidine kinase	Signal transduction mechanisms	T	CELLULAR PROCESSES AND SIGNALING
gene0519	Chr1	ENOG410XNMH	Histidine kinase	Signal transduction mechanisms	T	CELLULAR PROCESSES AND SIGNALING
gene0619	Chr1	ENOG410XNMH	Histidine kinase	Signal transduction mechanisms	T	CELLULAR PROCESSES AND SIGNALING
gene0757	Chr1	ENOG410XNMH	Histidine kinase	Signal transduction mechanisms	T	CELLULAR PROCESSES AND SIGNALING
gene0886	Chr1	ENOG410XNMH	Histidine kinase	Signal transduction mechanisms	T	CELLULAR PROCESSES AND SIGNALING
gene1111	Chr1	ENOG410XNMH	Histidine kinase	Signal transduction mechanisms	T	CELLULAR PROCESSES AND SIGNALING
gene1210	Chr1	ENOG410XNMH	Histidine kinase	Signal transduction mechanisms	T	CELLULAR PROCESSES AND SIGNALING
gene1230	Chr1	ENOG410XNMH	Histidine kinase	Signal transduction mechanisms	T	CELLULAR PROCESSES AND SIGNALING
gene1272	Chr1	ENOG410XNMH	Histidine kinase	Signal transduction mechanisms	T	CELLULAR PROCESSES AND SIGNALING
gene1291	Chr1	ENOG410XNMH	Histidine kinase	Signal transduction mechanisms	T	CELLULAR PROCESSES AND SIGNALING
gene1316	Chr1	ENOG410XNMH	Histidine kinase	Signal transduction mechanisms	T	CELLULAR PROCESSES AND SIGNALING
gene1325	Chr1	ENOG410XNMH	Histidine kinase	Signal transduction mechanisms	T	CELLULAR PROCESSES AND SIGNALING
gene1344	Chr1	ENOG410XNMH	Histidine kinase	Signal transduction mechanisms	T	CELLULAR PROCESSES AND SIGNALING
gene1414	Chr1	ENOG410XNMH	Histidine kinase	Signal transduction mechanisms	T	CELLULAR PROCESSES AND SIGNALING
gene1460	Chr1	ENOG410XNMH	Histidine kinase	Signal transduction mechanisms	T	CELLULAR PROCESSES AND SIGNALING
gene1479	Chr1	ENOG410XNMH	Histidine kinase	Signal transduction mechanisms	T	CELLULAR PROCESSES AND SIGNALING
gene1665	Chr1	ENOG410XNMH	Histidine kinase	Signal transduction mechanisms	T	CELLULAR PROCESSES AND SIGNALING
gene1694	Chr1	ENOG410XNMH	Histidine kinase	Signal transduction mechanisms	T	CELLULAR PROCESSES AND SIGNALING
gene1837	Chr1	ENOG410XNMH	Histidine kinase	Signal transduction mechanisms	T	CELLULAR PROCESSES AND SIGNALING
gene1859	Chr1	ENOG410XNMH	Histidine kinase	Signal transduction mechanisms	T	CELLULAR PROCESSES AND SIGNALING
gene1976	Chr1	ENOG410XNMH	Histidine kinase	Signal transduction mechanisms	T	CELLULAR PROCESSES AND SIGNALING
gene2190	Chr1	ENOG410XNMH	Histidine kinase	Signal transduction mechanisms	T	CELLULAR PROCESSES AND SIGNALING
gene2351	Chr1	ENOG410XNMH	Histidine kinase	Signal transduction mechanisms	T	CELLULAR PROCESSES AND SIGNALING
gene3091	Chr2	ENOG410XNMH	Histidine kinase	Signal transduction mechanisms	T	CELLULAR PROCESSES AND SIGNALING
gene0055	Chr1	COG2204	two component, sigma54 specific, transcriptional regulator, Fis family	Signal transduction mechanisms	T	CELLULAR PROCESSES AND SIGNALING
gene0850	Chr1	COG2204	two component, sigma54 specific, transcriptional regulator, Fis family	Signal transduction mechanisms	T	CELLULAR PROCESSES AND SIGNALING
gene0990	Chr1	COG2204	two component, sigma54 specific, transcriptional regulator, Fis family	Signal transduction mechanisms	T	CELLULAR PROCESSES AND SIGNALING
gene1413	Chr1	COG2204	two component, sigma54 specific, transcriptional regulator, Fis family	Signal transduction mechanisms	T	CELLULAR PROCESSES AND SIGNALING
gene1459	Chr1	COG2204	two component, sigma54 specific, transcriptional regulator, Fis family	Signal transduction mechanisms	T	CELLULAR PROCESSES AND SIGNALING
gene2159	Chr1	COG2204	two component, sigma54 specific, transcriptional regulator, Fis family	Signal transduction mechanisms	T	CELLULAR PROCESSES AND SIGNALING
gene2161	Chr1	COG2204	two component, sigma54 specific, transcriptional regulator, Fis family	Signal transduction mechanisms	T	CELLULAR PROCESSES AND SIGNALING
gene0056	Chr1	COG3852	Signal Transduction Histidine Kinase	Signal transduction mechanisms	T	CELLULAR PROCESSES AND SIGNALING
gene0057	Chr1	COG0174	glutamine synthetase	Amino acid transport and metabolism	E	METABOLISM
gene0058	Chr1	COG1217	gtp-binding protein typa	Signal transduction mechanisms	T	CELLULAR PROCESSES AND SIGNALING
gene0059	Chr1	COG3911	atpase-like protein	Function unknown	S	POORLY CHARACTERIZED
gene0060	Chr1	ENOG4111GIV	Protein of unknown function (DUF2959)	Function unknown	S	POORLY CHARACTERIZED
gene0061	Chr1	COG1295	ribonuclease BN	Function unknown	S	POORLY CHARACTERIZED
gene0062	Chr1	COG1490	Hydrolyzes D-tyrosyl-tRNA(Tyr) into D-tyrosine and free tRNA(Tyr). Could be a defense mechanism against a harmful effect of D-tyrosine (By similarity)	Translation, ribosomal structure and biogenesis	J	INFORMATION STORAGE AND PROCESSING
gene0063	Chr1	ENOG41126DB	thioesterase domain-containing protein	Function unknown	S	POORLY CHARACTERIZED
gene0065	Chr1	COG1866	Phosphoenolpyruvate Carboxylase	Energy production and conversion	C	METABOLISM
gene0066	Chr1	COG1281	Redox regulated molecular chaperone. Protects both thermally unfolding and oxidatively damaged proteins from irreversible aggregation. Plays an important role in the bacterial defense system toward oxidative stress (By similarity)	Post-translational modification, protein turnover, chaperones	O	CELLULAR PROCESSES AND SIGNALING
gene0067	Chr1	COG1188	heat shock protein	Translation, ribosomal structure and biogenesis	J	INFORMATION STORAGE AND PROCESSING
gene0068	Chr1	COG3031	protein secretion by the type II secretion system	Intracellular trafficking, secretion, and vesicular transport	U	CELLULAR PROCESSES AND SIGNALING
gene0069	Chr1	COG1450	general secretion pathway protein D	Intracellular trafficking, secretion, and vesicular transport	U	CELLULAR PROCESSES AND SIGNALING
gene0369	Chr1	COG1450	general secretion pathway protein D	Intracellular trafficking, secretion, and vesicular transport	U	CELLULAR PROCESSES AND SIGNALING
gene0370	Chr1	COG1450	general secretion pathway protein D	Intracellular trafficking, secretion, and vesicular transport	U	CELLULAR PROCESSES AND SIGNALING
gene0070	Chr1	COG2804	type ii secretion system protein e	Intracellular trafficking, secretion, and vesicular transport	U	CELLULAR PROCESSES AND SIGNALING
gene0373	Chr1	COG2804	type ii secretion system protein e	Intracellular trafficking, secretion, and vesicular transport	U	CELLULAR PROCESSES AND SIGNALING
gene2618	Chr1	COG2804	type ii secretion system protein e	Intracellular trafficking, secretion, and vesicular transport	U	CELLULAR PROCESSES AND SIGNALING
gene0071	Chr1	COG1459	Type ii secretion system	Intracellular trafficking, secretion, and vesicular transport	U	CELLULAR PROCESSES AND SIGNALING
gene0374	Chr1	COG1459	Type ii secretion system	Intracellular trafficking, secretion, and vesicular transport	U	CELLULAR PROCESSES AND SIGNALING
gene2619	Chr1	COG1459	Type ii secretion system	Intracellular trafficking, secretion, and vesicular transport	U	CELLULAR PROCESSES AND SIGNALING
gene0072	Chr1	COG2165	General secretion pathway protein	Intracellular trafficking, secretion, and vesicular transport	U	CELLULAR PROCESSES AND SIGNALING
gene0076	Chr1	COG2165	General secretion pathway protein	Intracellular trafficking, secretion, and vesicular transport	U	CELLULAR PROCESSES AND SIGNALING
gene0379	Chr1	COG2165	General secretion pathway protein	Intracellular trafficking, secretion, and vesicular transport	U	CELLULAR PROCESSES AND SIGNALING
gene0074	Chr1	ENOG41122FK	general secretion pathway protein h	Intracellular trafficking, secretion, and vesicular transport	U	CELLULAR PROCESSES AND SIGNALING
gene0077	Chr1	COG4795	General secretion pathway protein J	Intracellular trafficking, secretion, and vesicular transport	U	CELLULAR PROCESSES AND SIGNALING
gene0078	Chr1	COG3156	type II secretion system protein k	Intracellular trafficking, secretion, and vesicular transport	U	CELLULAR PROCESSES AND SIGNALING
gene0079	Chr1	COG3297	Involved in a type II secretion system (T2SS, formerly general secretion pathway, GSP) for the export of proteins (By similarity)	Intracellular trafficking, secretion, and vesicular transport	U	CELLULAR PROCESSES AND SIGNALING
gene0080	Chr1	COG3149	General secretion pathway	Intracellular trafficking, secretion, and vesicular transport	U	CELLULAR PROCESSES AND SIGNALING
gene0081	Chr1	ENOG4111VYH	general secretion pathway protein N	Intracellular trafficking, secretion, and vesicular transport	U	CELLULAR PROCESSES AND SIGNALING
gene0082	Chr1	ENOG410XTWD	Histidine kinase	Signal transduction mechanisms	T	CELLULAR PROCESSES AND SIGNALING
gene2828	Chr1	ENOG410XTWD	Histidine kinase	Signal transduction mechanisms	T	CELLULAR PROCESSES AND SIGNALING
gene0083	Chr1	COG0745	regulatoR	Signal transduction mechanisms	T	CELLULAR PROCESSES AND SIGNALING
gene0463	Chr1	COG0745	regulatoR	Signal transduction mechanisms	T	CELLULAR PROCESSES AND SIGNALING
gene0748	Chr1	COG0745	regulatoR	Signal transduction mechanisms	T	CELLULAR PROCESSES AND SIGNALING
gene1378	Chr1	COG0745	regulatoR	Signal transduction mechanisms	T	CELLULAR PROCESSES AND SIGNALING
gene1949	Chr1	COG0745	regulatoR	Signal transduction mechanisms	T	CELLULAR PROCESSES AND SIGNALING
gene2026	Chr1	COG0745	regulatoR	Signal transduction mechanisms	T	CELLULAR PROCESSES AND SIGNALING
gene2352	Chr1	COG0745	regulatoR	Signal transduction mechanisms	T	CELLULAR PROCESSES AND SIGNALING
gene2519	Chr1	COG0745	regulatoR	Signal transduction mechanisms	T	CELLULAR PROCESSES AND SIGNALING
gene2827	Chr1	COG0745	regulatoR	Signal transduction mechanisms	T	CELLULAR PROCESSES AND SIGNALING
gene0084	Chr1	COG0634	hypoxanthine phosphoribosyltransferase	Nucleotide transport and metabolism	F	METABOLISM
gene0442	Chr1	COG0634	hypoxanthine phosphoribosyltransferase	Nucleotide transport and metabolism	F	METABOLISM
gene0085	Chr1	COG0782	Necessary for efficient RNA polymerase transcription elongation past template-encoded arresting sites. The arresting sites in DNA have the property of trapping a certain fraction of elongating RNA polymerases that pass through, resulting in locked ternary complexes. Cleavage of the nascent transcript by cleavage factors such as GreA or GreB allows the resumption of elongation from the new 3'termi…	Transcription	K	INFORMATION STORAGE AND PROCESSING
gene0099	Chr1	COG0782	Necessary for efficient RNA polymerase transcription elongation past template-encoded arresting sites. The arresting sites in DNA have the property of trapping a certain fraction of elongating RNA polymerases that pass through, resulting in locked ternary complexes. Cleavage of the nascent transcript by cleavage factors such as GreA or GreB allows the resumption of elongation from the new 3'termi…	Transcription	K	INFORMATION STORAGE AND PROCESSING
gene0095	Chr1	COG0782	Necessary for efficient RNA polymerase transcription elongation past template-encoded arresting sites. The arresting sites in DNA have the property of trapping a certain fraction of elongating RNA polymerases that pass through, resulting in locked ternary complexes. Cleavage of the nascent transcript by cleavage factors such as GreA or GreB allows the resumption of elongation from the new 3'termi…	Transcription	K	INFORMATION STORAGE AND PROCESSING
gene0500	Chr1	COG0782	Necessary for efficient RNA polymerase transcription elongation past template-encoded arresting sites. The arresting sites in DNA have the property of trapping a certain fraction of elongating RNA polymerases that pass through, resulting in locked ternary complexes. Cleavage of the nascent transcript by cleavage factors such as GreA or GreB allows the resumption of elongation from the new 3'termi…	Transcription	K	INFORMATION STORAGE AND PROCESSING
gene0086	Chr1	ENOG410YD2R	-	Function unknown	S	POORLY CHARACTERIZED
gene0087	Chr1	ENOG4111XUZ	-	Function unknown	S	POORLY CHARACTERIZED
gene0088	Chr1	ENOG4112B0T	Protein of unknown function (DUF2806)	Function unknown	S	POORLY CHARACTERIZED
gene0089	Chr1	COG1484	IstB domain protein ATP-binding protein	Replication, recombination and repair	L	INFORMATION STORAGE AND PROCESSING
gene0090	Chr1	COG4584	Transposase	Replication, recombination and repair	L	INFORMATION STORAGE AND PROCESSING
gene0091	Chr1	ENOG410ZN8Y	Uncharacterized conserved protein (DUF2075)	Function unknown	S	POORLY CHARACTERIZED
gene0092	Chr1	COG1061	type iii restriction protein res subunit	Replication, recombination and repair	L	INFORMATION STORAGE AND PROCESSING
gene1338	Chr1	COG1061	type iii restriction protein res subunit	Replication, recombination and repair	L	INFORMATION STORAGE AND PROCESSING
gene2286	Chr1	COG1061	type iii restriction protein res subunit	Replication, recombination and repair	L	INFORMATION STORAGE AND PROCESSING
gene0094	Chr1	COG1396	Transcriptional regulator	Transcription	K	INFORMATION STORAGE AND PROCESSING
gene0096	Chr1	ENOG4111PPK	-	Function unknown	S	POORLY CHARACTERIZED
gene0097	Chr1	ENOG410Y2YR	integrase family	Function unknown	S	POORLY CHARACTERIZED
gene0098	Chr1	ENOG410Y1C6	Phage integrase family	Replication, recombination and repair	L	INFORMATION STORAGE AND PROCESSING
gene0100	Chr1	COG2183	domain protein	Transcription	K	INFORMATION STORAGE AND PROCESSING
gene0102	Chr1	COG0596	Alpha beta hydrolase	Function unknown	S	POORLY CHARACTERIZED
gene1031	Chr1	COG0596	Alpha beta hydrolase	Function unknown	S	POORLY CHARACTERIZED
gene1085	Chr1	COG0596	Alpha beta hydrolase	Function unknown	S	POORLY CHARACTERIZED
gene2032	Chr1	COG0596	Alpha beta hydrolase	Function unknown	S	POORLY CHARACTERIZED
gene2222	Chr1	COG0596	Alpha beta hydrolase	Function unknown	S	POORLY CHARACTERIZED
gene2643	Chr1	COG0596	Alpha beta hydrolase	Function unknown	S	POORLY CHARACTERIZED
gene0103	Chr1	COG1040	Competence protein	Function unknown	S	POORLY CHARACTERIZED
gene0104	Chr1	COG0316	Iron--sulfur cluster	Function unknown	S	POORLY CHARACTERIZED
gene0491	Chr1	COG0316	Iron--sulfur cluster	Function unknown	S	POORLY CHARACTERIZED
gene0592	Chr1	COG0316	Iron--sulfur cluster	Function unknown	S	POORLY CHARACTERIZED
gene0105	Chr1	COG0494	Nudix hydrolase	Replication, recombination and repair	L	INFORMATION STORAGE AND PROCESSING
gene0526	Chr1	COG0494	Nudix hydrolase	Replication, recombination and repair	L	INFORMATION STORAGE AND PROCESSING
gene1289	Chr1	COG0494	Nudix hydrolase	Replication, recombination and repair	L	INFORMATION STORAGE AND PROCESSING
gene1558	Chr1	COG0494	Nudix hydrolase	Replication, recombination and repair	L	INFORMATION STORAGE AND PROCESSING
gene2423	Chr1	COG0494	Nudix hydrolase	Replication, recombination and repair	L	INFORMATION STORAGE AND PROCESSING
gene0106	Chr1	COG1218	3'(2'),5'bisphosphate nucleotidase	Inorganic ion transport and metabolism	P	METABOLISM
gene0107	Chr1	COG3525	ec 3.2.1.52	Carbohydrate transport and metabolism	G	METABOLISM
gene0476	Chr1	COG3525	ec 3.2.1.52	Carbohydrate transport and metabolism	G	METABOLISM
gene0109	Chr1	COG1200	ATP-dependent DNA helicase recG	Replication, recombination and repair	L	INFORMATION STORAGE AND PROCESSING
gene3187	Chr2	COG1200	ATP-dependent DNA helicase recG	Replication, recombination and repair	L	INFORMATION STORAGE AND PROCESSING
gene0110	Chr1	COG0566	Methyltransferase	Translation, ribosomal structure and biogenesis	J	INFORMATION STORAGE AND PROCESSING
gene0248	Chr1	COG0566	Methyltransferase	Translation, ribosomal structure and biogenesis	J	INFORMATION STORAGE AND PROCESSING
gene1239	Chr1	COG0566	Methyltransferase	Translation, ribosomal structure and biogenesis	J	INFORMATION STORAGE AND PROCESSING
gene0111	Chr1	COG0317	In eubacteria ppGpp (guanosine 3'-diphosphate 5-' diphosphate) is a mediator of the stringent response that coordinates a variety of cellular activities in response to changes in nutritional abundance (By similarity)	Transcription; Signal transduction mechanisms	K;T	INFORMATION STORAGE AND PROCESSING;CELLULAR PROCESSES AND SIGNALING
gene2535	Chr1	COG0317	In eubacteria ppGpp (guanosine 3'-diphosphate 5-' diphosphate) is a mediator of the stringent response that coordinates a variety of cellular activities in response to changes in nutritional abundance (By similarity)	Transcription; Signal transduction mechanisms	K;T	INFORMATION STORAGE AND PROCESSING;CELLULAR PROCESSES AND SIGNALING
gene0112	Chr1	COG1758	Promotes RNA polymerase assembly. Latches the N- and C- terminal regions of the beta' subunit thereby facilitating its interaction with the beta and alpha subunits (By similarity)	Transcription	K	INFORMATION STORAGE AND PROCESSING
gene0113	Chr1	COG0194	Essential for recycling GMP and indirectly, cGMP (By similarity)	Nucleotide transport and metabolism	F	METABOLISM
gene0115	Chr1	COG2252	Xanthine uracil vitamin C permease	Function unknown	S	POORLY CHARACTERIZED
gene0628	Chr1	COG2252	Xanthine uracil vitamin C permease	Function unknown	S	POORLY CHARACTERIZED
gene2653	Chr1	COG2252	Xanthine uracil vitamin C permease	Function unknown	S	POORLY CHARACTERIZED
gene2655	Chr1	COG2252	Xanthine uracil vitamin C permease	Function unknown	S	POORLY CHARACTERIZED
gene0117	Chr1	COG2240	Pyridoxal kinase	Coenzyme transport and metabolism	H	METABOLISM
gene0118	Chr1	COG1561	YicC domain protein	Function unknown	S	POORLY CHARACTERIZED
gene0119	Chr1	COG0689	Phosphorolytic exoribonuclease that removes nucleotide residues following the -CCA terminus of tRNA and adds nucleotides to the ends of RNA molecules by using nucleoside diphosphates as substrates (By similarity)	Translation, ribosomal structure and biogenesis	J	INFORMATION STORAGE AND PROCESSING
gene0120	Chr1	COG0461	orotate phosphoribosyltransferase activity	Nucleotide transport and metabolism	F	METABOLISM
gene0122	Chr1	COG1560	lipid a biosynthesis	Cell wall/membrane/envelope biogenesis	M	CELLULAR PROCESSES AND SIGNALING
gene0143	Chr1	COG1560	lipid a biosynthesis	Cell wall/membrane/envelope biogenesis	M	CELLULAR PROCESSES AND SIGNALING
gene0123	Chr1	COG1309	Transcriptional regulator	Transcription	K	INFORMATION STORAGE AND PROCESSING
gene1136	Chr1	COG1309	Transcriptional regulator	Transcription	K	INFORMATION STORAGE AND PROCESSING
gene1945	Chr1	COG1309	Transcriptional regulator	Transcription	K	INFORMATION STORAGE AND PROCESSING
gene2793	Chr1	COG1309	Transcriptional regulator	Transcription	K	INFORMATION STORAGE AND PROCESSING
gene2889	Chr1	COG1309	Transcriptional regulator	Transcription	K	INFORMATION STORAGE AND PROCESSING
gene2994	Chr1	COG1309	Transcriptional regulator	Transcription	K	INFORMATION STORAGE AND PROCESSING
gene0124	Chr1	COG0452	Phosphopantothenoylcysteine decarboxylase	Coenzyme transport and metabolism	H	METABOLISM
gene0125	Chr1	COG0840	Methyl-accepting chemotaxis	Function unknown	S	POORLY CHARACTERIZED
gene0339	Chr1	COG0840	Methyl-accepting chemotaxis	Function unknown	S	POORLY CHARACTERIZED
gene0810	Chr1	COG0840	Methyl-accepting chemotaxis	Function unknown	S	POORLY CHARACTERIZED
gene1284	Chr1	COG0840	Methyl-accepting chemotaxis	Function unknown	S	POORLY CHARACTERIZED
gene1369	Chr1	COG0840	Methyl-accepting chemotaxis	Function unknown	S	POORLY CHARACTERIZED
gene1557	Chr1	COG0840	Methyl-accepting chemotaxis	Function unknown	S	POORLY CHARACTERIZED
gene1811	Chr1	COG0840	Methyl-accepting chemotaxis	Function unknown	S	POORLY CHARACTERIZED
gene1877	Chr1	COG0840	Methyl-accepting chemotaxis	Function unknown	S	POORLY CHARACTERIZED
gene1897	Chr1	COG0840	Methyl-accepting chemotaxis	Function unknown	S	POORLY CHARACTERIZED
gene2364	Chr1	COG0840	Methyl-accepting chemotaxis	Function unknown	S	POORLY CHARACTERIZED
gene2589	Chr1	COG0840	Methyl-accepting chemotaxis	Function unknown	S	POORLY CHARACTERIZED
gene0126	Chr1	COG2003	DNA repair protein (RadC	Replication, recombination and repair	L	INFORMATION STORAGE AND PROCESSING
gene0127	Chr1	COG0227	50s ribosomal protein L28	Translation, ribosomal structure and biogenesis	J	INFORMATION STORAGE AND PROCESSING
gene0128	Chr1	COG0267	50S ribosomal protein L33	Translation, ribosomal structure and biogenesis	J	INFORMATION STORAGE AND PROCESSING
gene0129	Chr1	COG2194	sulfuric ester hydrolase activity	Function unknown	S	POORLY CHARACTERIZED
gene2981	Chr1	COG2194	sulfuric ester hydrolase activity	Function unknown	S	POORLY CHARACTERIZED
gene0131	Chr1	COG0266	Involved in base excision repair of DNA damaged by oxidation or by mutagenic agents. Acts as DNA glycosylase that recognizes and removes damaged bases. Has a preference for oxidized purines, such as 7,8-dihydro-8-oxoguanine (8-oxoG). Has AP (apurinic apyrimidinic) lyase activity and introduces nicks in the DNA strand. Cleaves the DNA backbone by beta-delta elimination to generate a single-strand …	Replication, recombination and repair	L	INFORMATION STORAGE AND PROCESSING
gene0132	Chr1	COG0451	Nad-dependent epimerase dehydratase	Cell wall/membrane/envelope biogenesis	M	CELLULAR PROCESSES AND SIGNALING
gene0145	Chr1	COG0451	Nad-dependent epimerase dehydratase	Cell wall/membrane/envelope biogenesis	M	CELLULAR PROCESSES AND SIGNALING
gene0163	Chr1	COG0451	Nad-dependent epimerase dehydratase	Cell wall/membrane/envelope biogenesis	M	CELLULAR PROCESSES AND SIGNALING
gene2004	Chr1	COG0451	Nad-dependent epimerase dehydratase	Cell wall/membrane/envelope biogenesis	M	CELLULAR PROCESSES AND SIGNALING
gene0133	Chr1	COG0669	Reversibly transfers an adenylyl group from ATP to 4'- phosphopantetheine, yielding dephospho-CoA (dPCoA) and pyrophosphate (By similarity)	Coenzyme transport and metabolism	H	METABOLISM
gene0134	Chr1	COG0859	heptosyltransferase	Cell wall/membrane/envelope biogenesis	M	CELLULAR PROCESSES AND SIGNALING
gene0135	Chr1	COG0515	Serine Threonine protein kinase	Signal transduction mechanisms	T	CELLULAR PROCESSES AND SIGNALING
gene1283	Chr1	COG0515	Serine Threonine protein kinase	Signal transduction mechanisms	T	CELLULAR PROCESSES AND SIGNALING
gene3168	Chr2	COG0515	Serine Threonine protein kinase	Signal transduction mechanisms	T	CELLULAR PROCESSES AND SIGNALING
gene0136	Chr1	COG1519	3-Deoxy-D-manno-octulosonic-acid transferase	Cell wall/membrane/envelope biogenesis	M	CELLULAR PROCESSES AND SIGNALING
gene0137	Chr1	COG1887	CDP-glycerol poly(glycerophosphate) glycerophosphotransferase	Cell wall/membrane/envelope biogenesis	M	CELLULAR PROCESSES AND SIGNALING
gene0138	Chr1	COG0463	Glycosyl transferase, family 2	Cell wall/membrane/envelope biogenesis	M	CELLULAR PROCESSES AND SIGNALING
gene1331	Chr1	COG0463	Glycosyl transferase, family 2	Cell wall/membrane/envelope biogenesis	M	CELLULAR PROCESSES AND SIGNALING
gene1948	Chr1	COG0463	Glycosyl transferase, family 2	Cell wall/membrane/envelope biogenesis	M	CELLULAR PROCESSES AND SIGNALING
gene0139	Chr1	ENOG4111KR2	Succinoglycan biosynthesis	Function unknown	S	POORLY CHARACTERIZED
gene0140	Chr1	COG0438	Glycosyl transferase (Group 1	Cell wall/membrane/envelope biogenesis	M	CELLULAR PROCESSES AND SIGNALING
gene0158	Chr1	COG0438	Glycosyl transferase (Group 1	Cell wall/membrane/envelope biogenesis	M	CELLULAR PROCESSES AND SIGNALING
gene0165	Chr1	COG0438	Glycosyl transferase (Group 1	Cell wall/membrane/envelope biogenesis	M	CELLULAR PROCESSES AND SIGNALING
gene1403	Chr1	COG0438	Glycosyl transferase (Group 1	Cell wall/membrane/envelope biogenesis	M	CELLULAR PROCESSES AND SIGNALING
gene1411	Chr1	COG0438	Glycosyl transferase (Group 1	Cell wall/membrane/envelope biogenesis	M	CELLULAR PROCESSES AND SIGNALING
gene1412	Chr1	COG0438	Glycosyl transferase (Group 1	Cell wall/membrane/envelope biogenesis	M	CELLULAR PROCESSES AND SIGNALING
gene0141	Chr1	COG3306	lipopolysaccharide biosynthetic process	Cell wall/membrane/envelope biogenesis	M	CELLULAR PROCESSES AND SIGNALING
gene0142	Chr1	ENOG410ZK47	O-Antigen ligase	Function unknown	S	POORLY CHARACTERIZED
gene0144	Chr1	COG1004	UDP-glucose 6-dehydrogenase	Cell wall/membrane/envelope biogenesis	M	CELLULAR PROCESSES AND SIGNALING
gene0147	Chr1	COG1088	dTDP-glucose 4-6-dehydratase	Cell wall/membrane/envelope biogenesis	M	CELLULAR PROCESSES AND SIGNALING
gene0148	Chr1	COG1209	Catalyzes the formation of dTDP-glucose, from dTTP and glucose 1-phosphate, as well as its pyrophosphorolysis (By similarity)	Cell wall/membrane/envelope biogenesis	M	CELLULAR PROCESSES AND SIGNALING
gene0150	Chr1	COG0332	Catalyzes the condensation reaction of fatty acid synthesis by the addition to an acyl acceptor of two carbons from malonyl-ACP. Catalyzes the first condensation reaction which initiates fatty acid synthesis and may therefore play a role in governing the total rate of fatty acid production. Possesses both acetoacetyl-ACP synthase and acetyl transacylase activities. Its substrate specificity deter…	Lipid transport and metabolism	I	METABOLISM
gene1044	Chr1	COG0332	Catalyzes the condensation reaction of fatty acid synthesis by the addition to an acyl acceptor of two carbons from malonyl-ACP. Catalyzes the first condensation reaction which initiates fatty acid synthesis and may therefore play a role in governing the total rate of fatty acid production. Possesses both acetoacetyl-ACP synthase and acetyl transacylase activities. Its substrate specificity deter…	Lipid transport and metabolism	I	METABOLISM
gene0152	Chr1	COG1028	Dehydrogenase reductase	Function unknown	S	POORLY CHARACTERIZED
gene0154	Chr1	COG1028	Dehydrogenase reductase	Function unknown	S	POORLY CHARACTERIZED
gene0723	Chr1	COG1028	Dehydrogenase reductase	Function unknown	S	POORLY CHARACTERIZED
gene1064	Chr1	COG1028	Dehydrogenase reductase	Function unknown	S	POORLY CHARACTERIZED
gene1921	Chr1	COG1028	Dehydrogenase reductase	Function unknown	S	POORLY CHARACTERIZED
gene0153	Chr1	ENOG41123XV	-	Function unknown	S	POORLY CHARACTERIZED
gene0155	Chr1	COG0318	Amp-dependent synthetase and ligase	Lipid transport and metabolism; Secondary metabolites biosynthesis, transport and catabolism	I;Q	METABOLISM;METABOLISM
gene1032	Chr1	COG0318	Amp-dependent synthetase and ligase	Lipid transport and metabolism; Secondary metabolites biosynthesis, transport and catabolism	I;Q	METABOLISM;METABOLISM
gene1088	Chr1	COG0318	Amp-dependent synthetase and ligase	Lipid transport and metabolism; Secondary metabolites biosynthesis, transport and catabolism	I;Q	METABOLISM;METABOLISM
gene0156	Chr1	COG0399	DegT DnrJ EryC1 StrS aminotransferase	Amino acid transport and metabolism	E	METABOLISM
gene0168	Chr1	COG0399	DegT DnrJ EryC1 StrS aminotransferase	Amino acid transport and metabolism	E	METABOLISM
gene0159	Chr1	ENOG410XS8B	Polysaccharide biosynthesis protein	Cell wall/membrane/envelope biogenesis	M	CELLULAR PROCESSES AND SIGNALING
gene0160	Chr1	ENOG410Y3EA	Glycosyl transferases group 1	Cell wall/membrane/envelope biogenesis	M	CELLULAR PROCESSES AND SIGNALING
gene0162	Chr1	COG1086	polysaccharide biosynthesis protein	Cell wall/membrane/envelope biogenesis	M	CELLULAR PROCESSES AND SIGNALING
gene0169	Chr1	COG1086	polysaccharide biosynthesis protein	Cell wall/membrane/envelope biogenesis	M	CELLULAR PROCESSES AND SIGNALING
gene0164	Chr1	COG0381	UDP-N-acetylglucosamine 2-epimerase	Cell wall/membrane/envelope biogenesis	M	CELLULAR PROCESSES AND SIGNALING
gene0166	Chr1	COG2148	sugar transferase	Cell wall/membrane/envelope biogenesis	M	CELLULAR PROCESSES AND SIGNALING
gene1401	Chr1	COG2148	sugar transferase	Cell wall/membrane/envelope biogenesis	M	CELLULAR PROCESSES AND SIGNALING
gene0167	Chr1	COG0110	acetyltransferase	Function unknown	S	POORLY CHARACTERIZED
gene1018	Chr1	COG0110	acetyltransferase	Function unknown	S	POORLY CHARACTERIZED
gene1812	Chr1	COG0110	acetyltransferase	Function unknown	S	POORLY CHARACTERIZED
gene0170	Chr1	COG1502	Catalyzes the reversible phosphatidyl group transfer from one phosphatidylglycerol molecule to another to form cardiolipin (CL) (diphosphatidylglycerol) and glycerol (By similarity)	Lipid transport and metabolism	I	METABOLISM
gene1036	Chr1	COG1502	Catalyzes the reversible phosphatidyl group transfer from one phosphatidylglycerol molecule to another to form cardiolipin (CL) (diphosphatidylglycerol) and glycerol (By similarity)	Lipid transport and metabolism	I	METABOLISM
gene1879	Chr1	COG1502	Catalyzes the reversible phosphatidyl group transfer from one phosphatidylglycerol molecule to another to form cardiolipin (CL) (diphosphatidylglycerol) and glycerol (By similarity)	Lipid transport and metabolism	I	METABOLISM
gene0172	Chr1	ENOG410XZ68	acetyltransferase, (GNAT) family	Function unknown	S	POORLY CHARACTERIZED
gene0173	Chr1	COG0812	cell wall formation (By similarity)	Cell wall/membrane/envelope biogenesis	M	CELLULAR PROCESSES AND SIGNALING
gene0174	Chr1	COG0340	Biotin- acetyl-CoA-carboxylase ligase	Coenzyme transport and metabolism	H	METABOLISM
gene0175	Chr1	ENOG4112AN2	Protein of unknown function (DUF3135)	Function unknown	S	POORLY CHARACTERIZED
gene0176	Chr1	COG3765	lipopolysaccharide biosynthetic process	Cell wall/membrane/envelope biogenesis	M	CELLULAR PROCESSES AND SIGNALING
gene0177	Chr1	COG0234	Binds to cpn60 in the presence of Mg-ATP and suppresses the ATPase activity of the latter (By similarity)	Post-translational modification, protein turnover, chaperones	O	CELLULAR PROCESSES AND SIGNALING
gene0178	Chr1	COG0459	Prevents misfolding and promotes the refolding and proper assembly of unfolded polypeptides generated under stress conditions (By similarity)	Post-translational modification, protein turnover, chaperones	O	CELLULAR PROCESSES AND SIGNALING
gene0180	Chr1	COG1494	Fructose-1,6-bisphosphatase	Carbohydrate transport and metabolism	G	METABOLISM
gene0181	Chr1	COG3074	Non-essential, abundant cell division factor that is required for proper Z-ring formation. It is recruited early to the divisome by direct interaction with FtsZ, stimulating Z-ring assembly and thereby promoting cell division earlier in the cell cycle. Its recruitment to the Z-ring requires functional FtsA or ZipA (By similarity)	Function unknown	S	POORLY CHARACTERIZED
gene0182	Chr1	COG0685	Methylenetetrahydrofolate reductase	Amino acid transport and metabolism	E	METABOLISM
gene0183	Chr1	COG0527	Aspartokinase	Amino acid transport and metabolism	E	METABOLISM
gene0358	Chr1	COG0527	Aspartokinase	Amino acid transport and metabolism	E	METABOLISM
gene2515	Chr1	COG0527	Aspartokinase	Amino acid transport and metabolism	E	METABOLISM
gene2612	Chr1	COG0527	Aspartokinase	Amino acid transport and metabolism	E	METABOLISM
gene0184	Chr1	COG0626	cystathionine	Amino acid transport and metabolism	E	METABOLISM
gene0889	Chr1	COG0626	cystathionine	Amino acid transport and metabolism	E	METABOLISM
gene1880	Chr1	COG0626	cystathionine	Amino acid transport and metabolism	E	METABOLISM
gene2976	Chr1	COG0626	cystathionine	Amino acid transport and metabolism	E	METABOLISM
gene0185	Chr1	COG3060	This regulatory protein, when combined with SAM (S- adenosylmethionine) represses the expression of the methionine regulon and of enzymes involved in SAM synthesis (By similarity)	Transcription	K	INFORMATION STORAGE AND PROCESSING
gene0186	Chr1	COG0281	malic enzyme	Energy production and conversion	C	METABOLISM
gene1275	Chr1	COG0281	malic enzyme	Energy production and conversion	C	METABOLISM
gene0187	Chr1	COG0254	50S ribosomal protein L3-1	Translation, ribosomal structure and biogenesis	J	INFORMATION STORAGE AND PROCESSING
gene0188	Chr1	COG1198	Primosomal protein n'	Replication, recombination and repair	L	INFORMATION STORAGE AND PROCESSING
gene0189	Chr1	COG1609	Transcriptional regulator	Transcription	K	INFORMATION STORAGE AND PROCESSING
gene1322	Chr1	COG1609	Transcriptional regulator	Transcription	K	INFORMATION STORAGE AND PROCESSING
gene2028	Chr1	COG1609	Transcriptional regulator	Transcription	K	INFORMATION STORAGE AND PROCESSING
gene2583	Chr1	COG1609	Transcriptional regulator	Transcription	K	INFORMATION STORAGE AND PROCESSING
gene0190	Chr1	COG3087	Cell Division Protein	Cell cycle control, cell division, chromosome partitioning	D	CELLULAR PROCESSES AND SIGNALING
gene0191	Chr1	COG0250	Participates in transcription elongation, termination and antitermination (By similarity)	Transcription	K	INFORMATION STORAGE AND PROCESSING
gene2803	Chr1	COG0250	Participates in transcription elongation, termination and antitermination (By similarity)	Transcription	K	INFORMATION STORAGE AND PROCESSING
gene0192	Chr1	COG5405	Protease subunit of a proteasome-like degradation complex believed to be a general protein degrading machinery (By similarity)	Post-translational modification, protein turnover, chaperones	O	CELLULAR PROCESSES AND SIGNALING
gene0193	Chr1	COG1220	this subunit has chaperone activity. The binding of ATP and its subsequent hydrolysis by HslU are essential for unfolding of protein substrates subsequently hydrolyzed by HslV. HslU recognizes the N-terminal part of its protein substrates and unfolds these before they are guided to HslV for hydrolysis (By similarity)	Post-translational modification, protein turnover, chaperones	O	CELLULAR PROCESSES AND SIGNALING
gene0194	Chr1	COG3080	Seems to be involved in the anchoring of the catalytic components of the fumarate reductase complex to the cytoplasmic membrane (By similarity)	Energy production and conversion	C	METABOLISM
gene0195	Chr1	COG3029	Seems to be involved in the anchoring of the catalytic components of the fumarate reductase complex to the cytoplasmic membrane (By similarity)	Energy production and conversion	C	METABOLISM
gene0196	Chr1	COG0479	succinate dehydrogenase	Energy production and conversion	C	METABOLISM
gene2213	Chr1	COG0479	succinate dehydrogenase	Energy production and conversion	C	METABOLISM
gene0197	Chr1	COG1053	Succinate DeHydrogenase	Energy production and conversion	C	METABOLISM
gene2214	Chr1	COG1053	Succinate DeHydrogenase	Energy production and conversion	C	METABOLISM
gene0198	Chr1	COG2269	With EpmB is involved in the beta-lysylation step of the post-translational modification of translation elongation factor P (EF-P). Catalyzes the ATP-dependent activation of (R)-beta-lysine produced by EpmB, forming a lysyl-adenylate, from which the beta- lysyl moiety is then transferred to the epsilon-amino group of a conserved specific lysine residue in EF-P (By similarity)	Translation, ribosomal structure and biogenesis	J	INFORMATION STORAGE AND PROCESSING
gene0199	Chr1	COG0607	Rhodanese domain protein	Inorganic ion transport and metabolism	P	METABOLISM
gene1685	Chr1	COG0607	Rhodanese domain protein	Inorganic ion transport and metabolism	P	METABOLISM
gene1805	Chr1	COG0607	Rhodanese domain protein	Inorganic ion transport and metabolism	P	METABOLISM
gene2198	Chr1	COG0607	Rhodanese domain protein	Inorganic ion transport and metabolism	P	METABOLISM
gene2901	Chr1	COG0607	Rhodanese domain protein	Inorganic ion transport and metabolism	P	METABOLISM
gene0200	Chr1	COG1952	One of the proteins required for the normal export of preproteins out of the cell cytoplasm. It is a molecular chaperone that binds to a subset of precursor proteins, maintaining them in a translocation-competent state. It also specifically binds to its receptor SecA (By similarity)	Intracellular trafficking, secretion, and vesicular transport	U	CELLULAR PROCESSES AND SIGNALING
gene0201	Chr1	COG0240	glycerol-3-phosphate dehydrogenase	Energy production and conversion	C	METABOLISM
gene0202	Chr1	COG1045	serine acetyltransferase	Amino acid transport and metabolism	E	METABOLISM
gene0203	Chr1	COG1695	Transcriptional regulator	Transcription	K	INFORMATION STORAGE AND PROCESSING
gene0204	Chr1	COG2352	phosphoenolpyruvate carboxylase activity	Energy production and conversion	C	METABOLISM
gene0205	Chr1	COG0624	succinyl-diaminopimelate desuccinylase activity	Amino acid transport and metabolism	E	METABOLISM
gene2183	Chr1	COG0624	succinyl-diaminopimelate desuccinylase activity	Amino acid transport and metabolism	E	METABOLISM
gene0206	Chr1	COG0002	N-acetylglutamate semialdehyde dehydrogenase	Amino acid transport and metabolism	E	METABOLISM
gene0207	Chr1	COG0548	nag kinase	Amino acid transport and metabolism	E	METABOLISM
gene2327	Chr1	COG0548	nag kinase	Amino acid transport and metabolism	E	METABOLISM
gene0208	Chr1	COG0137	Citrulline--aspartate ligase	Amino acid transport and metabolism	E	METABOLISM
gene0209	Chr1	COG0165	argininosuccinate lyase	Amino acid transport and metabolism	E	METABOLISM
gene0212	Chr1	COG1249	dihydrolipoyl dehydrogenase	Energy production and conversion	C	METABOLISM
gene0440	Chr1	COG1249	dihydrolipoyl dehydrogenase	Energy production and conversion	C	METABOLISM
gene2890	Chr1	COG1249	dihydrolipoyl dehydrogenase	Energy production and conversion	C	METABOLISM
gene2973	Chr1	COG1249	dihydrolipoyl dehydrogenase	Energy production and conversion	C	METABOLISM
gene0213	Chr1	COG0678	peroxiredoxin	Post-translational modification, protein turnover, chaperones	O	CELLULAR PROCESSES AND SIGNALING
gene1571	Chr1	COG0695	Glutaredoxin	Post-translational modification, protein turnover, chaperones	O	CELLULAR PROCESSES AND SIGNALING
gene1656	Chr1	COG0695	Glutaredoxin	Post-translational modification, protein turnover, chaperones	O	CELLULAR PROCESSES AND SIGNALING
gene0214	Chr1	ENOG410XNR2	Transcriptional regulator	Transcription	K	INFORMATION STORAGE AND PROCESSING
gene2369	Chr1	ENOG410XNR2	Transcriptional regulator	Transcription	K	INFORMATION STORAGE AND PROCESSING
gene2695	Chr1	ENOG410XNR2	Transcriptional regulator	Transcription	K	INFORMATION STORAGE AND PROCESSING
gene0215	Chr1	COG5009	penicillin-binding protein 1A	Cell wall/membrane/envelope biogenesis	M	CELLULAR PROCESSES AND SIGNALING
gene0216	Chr1	COG4972	type IV pilus assembly protein pilm	Cell motility; Intracellular trafficking, secretion, and vesicular transport	N;U	CELLULAR PROCESSES AND SIGNALING;CELLULAR PROCESSES AND SIGNALING
gene0217	Chr1	COG3166	Fimbrial assembly family protein	Intracellular trafficking, secretion, and vesicular transport	U	CELLULAR PROCESSES AND SIGNALING
gene0218	Chr1	COG3167	pilus assembly protein pilo	Intracellular trafficking, secretion, and vesicular transport	U	CELLULAR PROCESSES AND SIGNALING
gene0219	Chr1	COG3168	Pilus assembly protein	Cell motility; Intracellular trafficking, secretion, and vesicular transport	N;U	CELLULAR PROCESSES AND SIGNALING;CELLULAR PROCESSES AND SIGNALING
gene0220	Chr1	COG4796	Type II and III secretion system protein	Intracellular trafficking, secretion, and vesicular transport	U	CELLULAR PROCESSES AND SIGNALING
gene0221	Chr1	COG0703	Catalyzes the specific phosphorylation of the 3-hydroxyl group of shikimic acid using ATP as a cosubstrate (By similarity)	Amino acid transport and metabolism	E	METABOLISM
gene0222	Chr1	COG0337	3-dehydroquinate synthase	Amino acid transport and metabolism	E	METABOLISM
gene0223	Chr1	COG3267	General secretion pathway protein	Intracellular trafficking, secretion, and vesicular transport	U	CELLULAR PROCESSES AND SIGNALING
gene0371	Chr1	COG3267	General secretion pathway protein	Intracellular trafficking, secretion, and vesicular transport	U	CELLULAR PROCESSES AND SIGNALING
gene2530	Chr1	COG3267	General secretion pathway protein	Intracellular trafficking, secretion, and vesicular transport	U	CELLULAR PROCESSES AND SIGNALING
gene0224	Chr1	COG0338	site-specific DNA-methyltransferase (adenine-specific) activity	Replication, recombination and repair	L	INFORMATION STORAGE AND PROCESSING
gene0225	Chr1	COG0036	ribulose-phosphate 3-epimerase activity	Carbohydrate transport and metabolism	G	METABOLISM
gene0226	Chr1	COG0546	had-superfamily hydrolase, subfamily ia, variant	Function unknown	S	POORLY CHARACTERIZED
gene0227	Chr1	COG0180	tryptophanyltRNA synthetase	Translation, ribosomal structure and biogenesis	J	INFORMATION STORAGE AND PROCESSING
gene0228	Chr1	COG0512	anthranilate synthase	Amino acid transport and metabolism	E	METABOLISM
gene1224	Chr1	COG0512	anthranilate synthase	Amino acid transport and metabolism	E	METABOLISM
gene0229	Chr1	COG4992	Acetylornithine aminotransferase	Amino acid transport and metabolism	E	METABOLISM
gene1262	Chr1	COG4992	Acetylornithine aminotransferase	Amino acid transport and metabolism	E	METABOLISM
gene0230	Chr1	COG3138	arginine	Amino acid transport and metabolism	E	METABOLISM
gene0231	Chr1	COG1012	Dehydrogenase	Energy production and conversion	C	METABOLISM
gene0919	Chr1	COG1012	Dehydrogenase	Energy production and conversion	C	METABOLISM
gene1794	Chr1	COG1012	Dehydrogenase	Energy production and conversion	C	METABOLISM
gene0232	Chr1	ENOG410Z3E0	DUF1338	Function unknown	S	POORLY CHARACTERIZED
gene0233	Chr1	COG0664	transcriptional regulator, crp fnr family	Signal transduction mechanisms	T	CELLULAR PROCESSES AND SIGNALING
gene0282	Chr1	COG0664	transcriptional regulator, crp fnr family	Signal transduction mechanisms	T	CELLULAR PROCESSES AND SIGNALING
gene1491	Chr1	COG0664	transcriptional regulator, crp fnr family	Signal transduction mechanisms	T	CELLULAR PROCESSES AND SIGNALING
gene0234	Chr1	COG3954	phosphoribulokinase (EC 2.7.1.19)	Energy production and conversion	C	METABOLISM
gene0235	Chr1	COG3089	UPF0270 protein	Function unknown	S	POORLY CHARACTERIZED
gene0236	Chr1	COG0429	Alpha beta hydrolase	Function unknown	S	POORLY CHARACTERIZED
gene0237	Chr1	COG5589	Protein of unknown function (DUF2390)	Function unknown	S	POORLY CHARACTERIZED
gene0238	Chr1	COG0488	(ABC) transporter	Function unknown	S	POORLY CHARACTERIZED
gene0566	Chr1	COG0488	(ABC) transporter	Function unknown	S	POORLY CHARACTERIZED
gene1467	Chr1	COG0488	(ABC) transporter	Function unknown	S	POORLY CHARACTERIZED
gene1519	Chr1	COG0488	(ABC) transporter	Function unknown	S	POORLY CHARACTERIZED
gene0239	Chr1	COG2249	(NAD(P)H dehydrogenase) (Quinone)	Function unknown	S	POORLY CHARACTERIZED
gene1259	Chr1	COG2249	(NAD(P)H dehydrogenase) (Quinone)	Function unknown	S	POORLY CHARACTERIZED
gene0240	Chr1	COG0475	Sodium hydrogen exchanger	Inorganic ion transport and metabolism	P	METABOLISM
gene0917	Chr1	COG1226	PotAssium voltage-gated channel	Inorganic ion transport and metabolism	P	METABOLISM
gene1254	Chr1	COG1226	PotAssium voltage-gated channel	Inorganic ion transport and metabolism	P	METABOLISM
gene1978	Chr1	COG1226	PotAssium voltage-gated channel	Inorganic ion transport and metabolism	P	METABOLISM
gene2231	Chr1	COG1226	PotAssium voltage-gated channel	Inorganic ion transport and metabolism	P	METABOLISM
gene2524	Chr1	COG1226	PotAssium voltage-gated channel	Inorganic ion transport and metabolism	P	METABOLISM
gene0241	Chr1	COG3529	nucleic-acid-binding protein	Function unknown	S	POORLY CHARACTERIZED
gene0242	Chr1	COG1047	peptidylprolyl cistrans isomerase	Post-translational modification, protein turnover, chaperones	O	CELLULAR PROCESSES AND SIGNALING
gene0554	Chr1	COG1047	peptidylprolyl cistrans isomerase	Post-translational modification, protein turnover, chaperones	O	CELLULAR PROCESSES AND SIGNALING
gene0243	Chr1	COG1446	asparaginase	Amino acid transport and metabolism	E	METABOLISM
gene2660	Chr1	COG1446	asparaginase	Amino acid transport and metabolism	E	METABOLISM
gene0244	Chr1	COG0104	Plays an important role in the de novo pathway of purine nucleotide biosynthesis	Nucleotide transport and metabolism	F	METABOLISM
gene1432	Chr1	COG0104	Plays an important role in the de novo pathway of purine nucleotide biosynthesis	Nucleotide transport and metabolism	F	METABOLISM
gene0245	Chr1	COG0790	Sel1 domain protein repeat-containing protein	Function unknown	S	POORLY CHARACTERIZED
gene1634	Chr1	COG0790	Sel1 domain protein repeat-containing protein	Function unknown	S	POORLY CHARACTERIZED
gene2134	Chr1	COG0790	Sel1 domain protein repeat-containing protein	Function unknown	S	POORLY CHARACTERIZED
gene0246	Chr1	COG0402	deaminase	Nucleotide transport and metabolism	F	METABOLISM
gene1956	Chr1	COG0402	deaminase	Nucleotide transport and metabolism	F	METABOLISM
gene2297	Chr1	COG0402	deaminase	Nucleotide transport and metabolism	F	METABOLISM
gene0247	Chr1	COG0557	3'-5' exoribonuclease that releases 5'-nucleoside monophosphates and is involved in maturation of structured RNAs (By similarity)	Transcription	K	INFORMATION STORAGE AND PROCESSING
gene0249	Chr1	COG0051	tRNA binding	Translation, ribosomal structure and biogenesis	J	INFORMATION STORAGE AND PROCESSING
gene0250	Chr1	COG0087	One of the primary rRNA binding proteins, it binds directly near the 3'-end of the 23S rRNA, where it nucleates assembly of the 50S subunit (By similarity)	Translation, ribosomal structure and biogenesis	J	INFORMATION STORAGE AND PROCESSING
gene0251	Chr1	COG0088	One of the primary rRNA binding proteins, this protein initially binds near the 5'-end of the 23S rRNA. It is important during the early stages of 50S assembly. It makes multiple contacts with different domains of the 23S rRNA in the assembled 50S subunit and ribosome (By similarity)	Translation, ribosomal structure and biogenesis	J	INFORMATION STORAGE AND PROCESSING
gene0252	Chr1	COG0089	One of the early assembly proteins it binds 23S rRNA. One of the proteins that surrounds the polypeptide exit tunnel on the outside of the ribosome. Forms the main docking site for trigger factor binding to the ribosome (By similarity)	Translation, ribosomal structure and biogenesis	J	INFORMATION STORAGE AND PROCESSING
gene0253	Chr1	COG0090	One of the primary rRNA binding proteins. Required for association of the 30S and 50S subunits to form the 70S ribosome, for tRNA binding and peptide bond formation. It has been suggested to have peptidyltransferase activity	Translation, ribosomal structure and biogenesis	J	INFORMATION STORAGE AND PROCESSING
gene0254	Chr1	COG0185	Protein S19 forms a complex with S13 that binds strongly to the 16S ribosomal RNA (By similarity)	Translation, ribosomal structure and biogenesis	J	INFORMATION STORAGE AND PROCESSING
gene0255	Chr1	COG0091	The globular domain of the protein is located near the polypeptide exit tunnel on the outside of the subunit, while an extended beta-hairpin is found that lines the wall of the exit tunnel in the center of the 70S ribosome (By similarity)	Translation, ribosomal structure and biogenesis	J	INFORMATION STORAGE AND PROCESSING
gene0256	Chr1	COG0092	Binds the lower part of the 30S subunit head. Binds mRNA in the 70S ribosome, positioning it for translation (By similarity)	Translation, ribosomal structure and biogenesis	J	INFORMATION STORAGE AND PROCESSING
gene0257	Chr1	COG0197	Binds 23S rRNA and is also seen to make contacts with the A and possibly P site tRNAs (By similarity)	Translation, ribosomal structure and biogenesis	J	INFORMATION STORAGE AND PROCESSING
gene0258	Chr1	COG0255	50s ribosomal protein l29	Translation, ribosomal structure and biogenesis	J	INFORMATION STORAGE AND PROCESSING
gene0259	Chr1	COG0186	One of the primary rRNA binding proteins, it binds specifically to the 5'-end of 16S ribosomal	Translation, ribosomal structure and biogenesis	J	INFORMATION STORAGE AND PROCESSING
gene0260	Chr1	COG0093	Binds to 23S rRNA. Forms part of two intersubunit bridges in the 70S ribosome (By similarity)	Translation, ribosomal structure and biogenesis	J	INFORMATION STORAGE AND PROCESSING
gene0261	Chr1	COG0198	One of the proteins that surrounds the polypeptide exit tunnel on the outside of the subunit (By similarity)	Translation, ribosomal structure and biogenesis	J	INFORMATION STORAGE AND PROCESSING
gene0262	Chr1	COG0094	This is 1 of the proteins that binds and probably mediates the attachment of the 5S RNA into the large ribosomal subunit, where it forms part of the central protuberance. In the 70S ribosome it contacts protein S13 of the 30S subunit (bridge B1b), connecting the 2 subunits	Translation, ribosomal structure and biogenesis	J	INFORMATION STORAGE AND PROCESSING
gene0263	Chr1	COG0199	Binds 16S rRNA, required for the assembly of 30S particles and may also be responsible for determining the conformation of the 16S rRNA at the A site (By similarity)	Translation, ribosomal structure and biogenesis	J	INFORMATION STORAGE AND PROCESSING
gene0264	Chr1	COG0096	One of the primary rRNA binding proteins, it binds directly to 16S rRNA central domain where it helps coordinate assembly of the platform of the 30S subunit (By similarity)	Translation, ribosomal structure and biogenesis	J	INFORMATION STORAGE AND PROCESSING
gene0265	Chr1	COG0097	This protein binds to the 23S rRNA, and is important in its secondary structure. It is located near the subunit interface in the base of the L7 L12 stalk, and near the tRNA binding site of the peptidyltransferase center (By similarity)	Translation, ribosomal structure and biogenesis	J	INFORMATION STORAGE AND PROCESSING
gene0266	Chr1	COG0256	This is one of the proteins that binds and probably mediates the attachment of the 5S RNA into the large ribosomal subunit, where it forms part of the central protuberance (By similarity)	Translation, ribosomal structure and biogenesis	J	INFORMATION STORAGE AND PROCESSING
gene0267	Chr1	COG0098	Located at the back of the 30S subunit body where it stabilizes the conformation of the head with respect to the body (By similarity)	Translation, ribosomal structure and biogenesis	J	INFORMATION STORAGE AND PROCESSING
gene0268	Chr1	COG1841	ribosomal large subunit biogenesis	Translation, ribosomal structure and biogenesis	J	INFORMATION STORAGE AND PROCESSING
gene0269	Chr1	COG0200	Binds to the 23S rRNA (By similarity)	Translation, ribosomal structure and biogenesis	J	INFORMATION STORAGE AND PROCESSING
gene0270	Chr1	COG0201	The central subunit of the protein translocation channel SecYEG. Consists of two halves formed by TMs 1-5 and 6-10. These two domains form a lateral gate at the front which open onto the bilayer between TMs 2 and 7, and are clamped together by SecE at the back. The channel is closed by both a pore ring composed of hydrophobic SecY resides and a short helix (helix 2A) on the extracellular side of …	Intracellular trafficking, secretion, and vesicular transport	U	CELLULAR PROCESSES AND SIGNALING
gene0271	Chr1	COG0257	50S ribosomal protein L36	Translation, ribosomal structure and biogenesis	J	INFORMATION STORAGE AND PROCESSING
gene0678	Chr1	COG0257	50S ribosomal protein L36	Translation, ribosomal structure and biogenesis	J	INFORMATION STORAGE AND PROCESSING
gene0272	Chr1	COG0099	Located at the top of the head of the 30S subunit, it contacts several helices of the 16S rRNA. In the 70S ribosome it contacts the 23S rRNA (bridge B1a) and protein L5 of the 50S subunit (bridge B1b), connecting the 2 subunits	Translation, ribosomal structure and biogenesis	J	INFORMATION STORAGE AND PROCESSING
gene0273	Chr1	COG0100	Located on the platform of the 30S subunit, it bridges several disparate RNA helices of the 16S rRNA. Forms part of the Shine-Dalgarno cleft in the 70S ribosome (By similarity)	Translation, ribosomal structure and biogenesis	J	INFORMATION STORAGE AND PROCESSING
gene0274	Chr1	COG0522	One of the primary rRNA binding proteins, it binds directly to 16S rRNA where it nucleates assembly of the body of the 30S subunit (By similarity)	Translation, ribosomal structure and biogenesis	J	INFORMATION STORAGE AND PROCESSING
gene0275	Chr1	COG0202	DNA-dependent RNA polymerase catalyzes the transcription of DNA into RNA using the four ribonucleoside triphosphates as substrates (By similarity)	Transcription	K	INFORMATION STORAGE AND PROCESSING
gene0276	Chr1	COG0203	50S ribosomal protein l17	Translation, ribosomal structure and biogenesis	J	INFORMATION STORAGE AND PROCESSING
gene0278	Chr1	COG0545	Peptidyl-prolyl cis-trans isomerase	Post-translational modification, protein turnover, chaperones	O	CELLULAR PROCESSES AND SIGNALING
gene2760	Chr1	COG0545	Peptidyl-prolyl cis-trans isomerase	Post-translational modification, protein turnover, chaperones	O	CELLULAR PROCESSES AND SIGNALING
gene0279	Chr1	COG3061	opacity-associated protein	Cell wall/membrane/envelope biogenesis	M	CELLULAR PROCESSES AND SIGNALING
gene0280	Chr1	COG0697	membrane	Amino acid transport and metabolism; Carbohydrate transport and metabolism	E;G	METABOLISM;METABOLISM
gene1019	Chr1	COG0697	membrane	Amino acid transport and metabolism; Carbohydrate transport and metabolism	E;G	METABOLISM;METABOLISM
gene1677	Chr1	COG0697	membrane	Amino acid transport and metabolism; Carbohydrate transport and metabolism	E;G	METABOLISM;METABOLISM
gene1761	Chr1	COG0697	membrane	Amino acid transport and metabolism; Carbohydrate transport and metabolism	E;G	METABOLISM;METABOLISM
gene1762	Chr1	COG0697	membrane	Amino acid transport and metabolism; Carbohydrate transport and metabolism	E;G	METABOLISM;METABOLISM
gene2789	Chr1	COG0697	membrane	Amino acid transport and metabolism; Carbohydrate transport and metabolism	E;G	METABOLISM;METABOLISM
gene3017	Chr1	COG0697	membrane	Amino acid transport and metabolism; Carbohydrate transport and metabolism	E;G	METABOLISM;METABOLISM
gene3027	Chr1	COG0697	membrane	Amino acid transport and metabolism; Carbohydrate transport and metabolism	E;G	METABOLISM;METABOLISM
gene0281	Chr1	COG2153	-acetyltransferase	Function unknown	S	POORLY CHARACTERIZED
gene0283	Chr1	COG0737	5-Nucleotidase	Nucleotide transport and metabolism	F	METABOLISM
gene0800	Chr1	COG0737	5-Nucleotidase	Nucleotide transport and metabolism	F	METABOLISM
gene0284	Chr1	COG0007	Multifunctional enzyme that catalyzes the SAM-dependent methylation of uroporphyrinogen III at position C-2 and C-7 to form precorrin-2 and then position C-12 or C-18 to form trimethylpyrrocorphin 2. It also catalyzes the conversion of precorrin-2 into siroheme. This reaction consists of the NAD- dependent oxidation of precorrin-2 into sirohydrochlorin and its subsequent ferrochelation into siroh…	Coenzyme transport and metabolism	H	METABOLISM
gene1539	Chr1	COG0007	Multifunctional enzyme that catalyzes the SAM-dependent methylation of uroporphyrinogen III at position C-2 and C-7 to form precorrin-2 and then position C-12 or C-18 to form trimethylpyrrocorphin 2. It also catalyzes the conversion of precorrin-2 into siroheme. This reaction consists of the NAD- dependent oxidation of precorrin-2 into sirohydrochlorin and its subsequent ferrochelation into siroh…	Coenzyme transport and metabolism	H	METABOLISM
gene0285	Chr1	COG0175	Reduction of activated sulfate into sulfite (By similarity)	Inorganic ion transport and metabolism	P	METABOLISM
gene0298	Chr1	COG0175	Reduction of activated sulfate into sulfite (By similarity)	Inorganic ion transport and metabolism	P	METABOLISM
gene0286	Chr1	COG2895	may be the GTPase, regulating ATP sulfurylase activity (By similarity)	Inorganic ion transport and metabolism	P	METABOLISM
gene0287	Chr1	COG0471	Transporter	Inorganic ion transport and metabolism	P	METABOLISM
gene1601	Chr1	COG0471	Transporter	Inorganic ion transport and metabolism	P	METABOLISM
gene2788	Chr1	COG0471	Transporter	Inorganic ion transport and metabolism	P	METABOLISM
gene0288	Chr1	COG0529	Catalyzes the synthesis of activated sulfate (By similarity)	Inorganic ion transport and metabolism	P	METABOLISM
gene0290	Chr1	COG1406	chemotaxis protein	Cell motility	N	CELLULAR PROCESSES AND SIGNALING
gene0291	Chr1	COG0735	Ferric uptake regulator, Fur family	Transcription	K	INFORMATION STORAGE AND PROCESSING
gene2226	Chr1	COG0735	Ferric uptake regulator, Fur family	Transcription	K	INFORMATION STORAGE AND PROCESSING
gene0292	Chr1	COG0042	Catalyzes the synthesis of dihydrouridine a modified base found in the D-loop of most tRNAs (By similarity)	Translation, ribosomal structure and biogenesis	J	INFORMATION STORAGE AND PROCESSING
gene1012	Chr1	COG0042	Catalyzes the synthesis of dihydrouridine a modified base found in the D-loop of most tRNAs (By similarity)	Translation, ribosomal structure and biogenesis	J	INFORMATION STORAGE AND PROCESSING
gene2851	Chr1	COG0042	Catalyzes the synthesis of dihydrouridine a modified base found in the D-loop of most tRNAs (By similarity)	Translation, ribosomal structure and biogenesis	J	INFORMATION STORAGE AND PROCESSING
gene0296	Chr1	COG0369	Component of the sulfite reductase complex that catalyzes the 6-electron reduction of sulfite to sulfide. This is one of several activities required for the biosynthesis of L- cysteine from sulfate. The flavoprotein component catalyzes the electron flow from NADPH - FAD - FMN to the hemoprotein component (By similarity)	Inorganic ion transport and metabolism	P	METABOLISM
gene0297	Chr1	COG0155	Component of the sulfite reductase complex that catalyzes the 6-electron reduction of sulfite to sulfide. This is one of several activities required for the biosynthesis of L- cysteine from sulfate (By similarity)	Energy production and conversion	C	METABOLISM
gene0309	Chr1	COG0586	SNARE associated Golgi	Function unknown	S	POORLY CHARACTERIZED
gene0310	Chr1	COG0025	Sodium hydrogen exchanger	Inorganic ion transport and metabolism	P	METABOLISM
gene0311	Chr1	COG0646	homocysteine S-methyltransferase activity	Amino acid transport and metabolism	E	METABOLISM
gene0313	Chr1	COG2239	magnesium ion transmembrane transporter activity	Inorganic ion transport and metabolism	P	METABOLISM
gene0496	Chr1	COG2239	magnesium ion transmembrane transporter activity	Inorganic ion transport and metabolism	P	METABOLISM
gene0314	Chr1	COG1925	phosphocarrier protein (HPr)	Carbohydrate transport and metabolism	G	METABOLISM
gene0710	Chr1	COG1925	phosphocarrier protein (HPr)	Carbohydrate transport and metabolism	G	METABOLISM
gene0315	Chr1	COG1660	Displays ATPase and GTPase activities (By similarity)	Function unknown	S	POORLY CHARACTERIZED
gene0316	Chr1	COG1762	PTS System	Carbohydrate transport and metabolism	G	METABOLISM
gene0897	Chr1	COG1762	PTS System	Carbohydrate transport and metabolism	G	METABOLISM
gene0317	Chr1	COG1544	sigma 54 modulation protein ribosomal protein S30ea	Translation, ribosomal structure and biogenesis	J	INFORMATION STORAGE AND PROCESSING
gene0573	Chr1	COG1544	sigma 54 modulation protein ribosomal protein S30ea	Translation, ribosomal structure and biogenesis	J	INFORMATION STORAGE AND PROCESSING
gene0318	Chr1	COG1508	Sigma factors are initiation factors that promote the attachment of RNA polymerase to specific initiation sites and are then released (By similarity)	Transcription	K	INFORMATION STORAGE AND PROCESSING
gene0319	Chr1	COG1137	(ABC) transporter	Function unknown	S	POORLY CHARACTERIZED
gene0320	Chr1	COG1934	lipopolysaccharide transport periplasmic protein lptA	Function unknown	S	POORLY CHARACTERIZED
gene0321	Chr1	COG3117	Required for the translocation of lipopolysaccharide (LPS) from the inner membrane to the outer membrane (By similarity)	Function unknown	S	POORLY CHARACTERIZED
gene0322	Chr1	COG1778	3-deoxy-d-manno-octulosonate 8-phosphate phosphatase	Function unknown	S	POORLY CHARACTERIZED
gene0323	Chr1	COG0517	Catalyzes the conversion of inosine 5'-phosphate (IMP) to xanthosine 5'-phosphate (XMP), the first committed and rate- limiting step in the de novo synthesis of guanine nucleotides, and therefore plays an important role in the regulation of cell growth (By similarity)	Function unknown	S	POORLY CHARACTERIZED
gene0728	Chr1	COG0517	Catalyzes the conversion of inosine 5'-phosphate (IMP) to xanthosine 5'-phosphate (XMP), the first committed and rate- limiting step in the de novo synthesis of guanine nucleotides, and therefore plays an important role in the regulation of cell growth (By similarity)	Function unknown	S	POORLY CHARACTERIZED
gene0858	Chr1	COG0517	Catalyzes the conversion of inosine 5'-phosphate (IMP) to xanthosine 5'-phosphate (XMP), the first committed and rate- limiting step in the de novo synthesis of guanine nucleotides, and therefore plays an important role in the regulation of cell growth (By similarity)	Function unknown	S	POORLY CHARACTERIZED
gene2311	Chr1	COG0517	Catalyzes the conversion of inosine 5'-phosphate (IMP) to xanthosine 5'-phosphate (XMP), the first committed and rate- limiting step in the de novo synthesis of guanine nucleotides, and therefore plays an important role in the regulation of cell growth (By similarity)	Function unknown	S	POORLY CHARACTERIZED
gene2365	Chr1	COG0517	Catalyzes the conversion of inosine 5'-phosphate (IMP) to xanthosine 5'-phosphate (XMP), the first committed and rate- limiting step in the de novo synthesis of guanine nucleotides, and therefore plays an important role in the regulation of cell growth (By similarity)	Function unknown	S	POORLY CHARACTERIZED
gene0324	Chr1	COG0530	exchanger	Inorganic ion transport and metabolism	P	METABOLISM
gene0325	Chr1	COG1127	lipid transport	Secondary metabolites biosynthesis, transport and catabolism	Q	METABOLISM
gene0326	Chr1	COG0767	ABC transporter (permease)	Secondary metabolites biosynthesis, transport and catabolism	Q	METABOLISM
gene0327	Chr1	COG1463	Mammalian cell entry related domain protein	Secondary metabolites biosynthesis, transport and catabolism	Q	METABOLISM
gene0328	Chr1	COG2854	Toluene tolerance family protein	Secondary metabolites biosynthesis, transport and catabolism	Q	METABOLISM
gene0329	Chr1	ENOG410XZER	antagonist	Function unknown	S	POORLY CHARACTERIZED
gene0330	Chr1	COG5007	BolA family	Transcription	K	INFORMATION STORAGE AND PROCESSING
gene0331	Chr1	COG0766	Cell wall formation. Adds enolpyruvyl to UDP-N- acetylglucosamine (By similarity)	Cell wall/membrane/envelope biogenesis	M	CELLULAR PROCESSES AND SIGNALING
gene0332	Chr1	COG0204	Acyltransferase	Lipid transport and metabolism	I	METABOLISM
gene0333	Chr1	COG1680	Beta-lactamase	Defense mechanisms	V	CELLULAR PROCESSES AND SIGNALING
gene1590	Chr1	COG1680	Beta-lactamase	Defense mechanisms	V	CELLULAR PROCESSES AND SIGNALING
gene0344	Chr1	COG0741	transglycosylase	Cell wall/membrane/envelope biogenesis	M	CELLULAR PROCESSES AND SIGNALING
gene0567	Chr1	COG0741	transglycosylase	Cell wall/membrane/envelope biogenesis	M	CELLULAR PROCESSES AND SIGNALING
gene0666	Chr1	COG0741	transglycosylase	Cell wall/membrane/envelope biogenesis	M	CELLULAR PROCESSES AND SIGNALING
gene1687	Chr1	COG0741	transglycosylase	Cell wall/membrane/envelope biogenesis	M	CELLULAR PROCESSES AND SIGNALING
gene2374	Chr1	COG0741	transglycosylase	Cell wall/membrane/envelope biogenesis	M	CELLULAR PROCESSES AND SIGNALING
gene0345	Chr1	COG2924	Could be a mediator in iron transactions between iron acquisition and iron-requiring processes, such as synthesis and or repair of Fe-S clusters in biosynthetic enzymes (By similarity)	Inorganic ion transport and metabolism	P	METABOLISM
gene0346	Chr1	COG1194	a g-specific adenine glycosylase	Replication, recombination and repair	L	INFORMATION STORAGE AND PROCESSING
gene0347	Chr1	COG0220	Catalyzes the formation of N(7)-methylguanine at position 46 (m7G46) in tRNA (By similarity)	Function unknown	S	POORLY CHARACTERIZED
gene0348	Chr1	COG2066	Glutaminase	Amino acid transport and metabolism	E	METABOLISM
gene0349	Chr1	COG0635	Coproporphyrinogen III oxidase	Coenzyme transport and metabolism	H	METABOLISM
gene0986	Chr1	COG0635	Coproporphyrinogen III oxidase	Coenzyme transport and metabolism	H	METABOLISM
gene3000	Chr1	COG0635	Coproporphyrinogen III oxidase	Coenzyme transport and metabolism	H	METABOLISM
gene0350	Chr1	COG0127	Pyrophosphatase that hydrolyzes non-canonical purine nucleotides such as XTP and ITP dITP to their respective monophosphate derivatives. Might exclude non-canonical purines from DNA precursor pool, thus preventing their incorporation into DNA and avoiding chromosomal lesions (By similarity)	Nucleotide transport and metabolism	F	METABOLISM
gene0351	Chr1	ENOG4111WE5	-	Function unknown	S	POORLY CHARACTERIZED
gene0352	Chr1	COG1872	UPF0235 protein	Function unknown	S	POORLY CHARACTERIZED
gene0353	Chr1	COG0762	integral membrane protein	Function unknown	S	POORLY CHARACTERIZED
gene0354	Chr1	COG0345	pyrroline-5-carboxylate reductase activity	Amino acid transport and metabolism	E	METABOLISM
gene0355	Chr1	COG0325	alanine racemase domain protein	Function unknown	S	POORLY CHARACTERIZED
gene0356	Chr1	COG2805	twitching motility protein	Cell motility; Intracellular trafficking, secretion, and vesicular transport	N;U	CELLULAR PROCESSES AND SIGNALING;CELLULAR PROCESSES AND SIGNALING
gene0357	Chr1	COG5008	twitching motility protein	Cell motility; Intracellular trafficking, secretion, and vesicular transport	N;U	CELLULAR PROCESSES AND SIGNALING;CELLULAR PROCESSES AND SIGNALING
gene0359	Chr1	COG0075	aminotransferase	Amino acid transport and metabolism	E	METABOLISM
gene0360	Chr1	COG3307	O-Antigen Polymerase	Cell wall/membrane/envelope biogenesis	M	CELLULAR PROCESSES AND SIGNALING
gene0361	Chr1	COG0178	The UvrABC repair system catalyzes the recognition and processing of DNA lesions. UvrA is an ATPase and a DNA-binding protein. A damage recognition complex composed of 2 UvrA and 2 UvrB subunits scans DNA for abnormalities. When the presence of a lesion has been verified by UvrB, the UvrA molecules dissociate (By similarity)	Replication, recombination and repair	L	INFORMATION STORAGE AND PROCESSING
gene0362	Chr1	COG1210	utp--glucose-1-phosphate uridylyltransferase	Cell wall/membrane/envelope biogenesis	M	CELLULAR PROCESSES AND SIGNALING
gene0363	Chr1	COG2771	Transcriptional regulator, luxr family	Transcription	K	INFORMATION STORAGE AND PROCESSING
gene2673	Chr1	COG2771	Transcriptional regulator, luxr family	Transcription	K	INFORMATION STORAGE AND PROCESSING
gene0364	Chr1	COG0629	single-stranded DNA-binding protein	Replication, recombination and repair	L	INFORMATION STORAGE AND PROCESSING
gene0365	Chr1	COG2200	Diguanylate cyclase phosphodiesterase	Signal transduction mechanisms	T	CELLULAR PROCESSES AND SIGNALING
gene0570	Chr1	COG2200	Diguanylate cyclase phosphodiesterase	Signal transduction mechanisms	T	CELLULAR PROCESSES AND SIGNALING
gene1110	Chr1	COG2200	Diguanylate cyclase phosphodiesterase	Signal transduction mechanisms	T	CELLULAR PROCESSES AND SIGNALING
gene2500	Chr1	COG2200	Diguanylate cyclase phosphodiesterase	Signal transduction mechanisms	T	CELLULAR PROCESSES AND SIGNALING
gene3029	Chr1	COG2200	Diguanylate cyclase phosphodiesterase	Signal transduction mechanisms	T	CELLULAR PROCESSES AND SIGNALING
gene1398	Chr1	COG2199	Diguanylate cyclase	Signal transduction mechanisms	T	CELLULAR PROCESSES AND SIGNALING
gene1842	Chr1	COG2199	Diguanylate cyclase	Signal transduction mechanisms	T	CELLULAR PROCESSES AND SIGNALING
gene2652	Chr1	COG2199	Diguanylate cyclase	Signal transduction mechanisms	T	CELLULAR PROCESSES AND SIGNALING
gene2854	Chr1	COG2199	Diguanylate cyclase	Signal transduction mechanisms	T	CELLULAR PROCESSES AND SIGNALING
gene0366	Chr1	ENOG41129G1	(MSHA) biogenesis protein MshI	Function unknown	S	POORLY CHARACTERIZED
gene0367	Chr1	ENOG41122XY	msha biogenesis protein mshj	Function unknown	S	POORLY CHARACTERIZED
gene0368	Chr1	ENOG410Y2BN	(MSHA) biogenesis protein MshK	Function unknown	S	POORLY CHARACTERIZED
gene0372	Chr1	ENOG41123VK	(MSHA) biogenesis protein MshN	Function unknown	S	POORLY CHARACTERIZED
gene0376	Chr1	ENOG4112A1T	-	Function unknown	S	POORLY CHARACTERIZED
gene0377	Chr1	ENOG41124XR	MSHA pilin protein, MshA	Intracellular trafficking, secretion, and vesicular transport	U	CELLULAR PROCESSES AND SIGNALING
gene0378	Chr1	ENOG410Y0QV	MSHA pilin protein MshC	Function unknown	S	POORLY CHARACTERIZED
gene0381	Chr1	ENOG410XUV0	(MSHA) biogenesis protein MshP	Function unknown	S	POORLY CHARACTERIZED
gene0382	Chr1	ENOG410XNQH	MSHA biogenesis protein MshQ	Function unknown	S	POORLY CHARACTERIZED
gene0383	Chr1	COG1077	Rod shape-determining protein, MreB	Cell cycle control, cell division, chromosome partitioning	D	CELLULAR PROCESSES AND SIGNALING
gene0384	Chr1	COG1792	regulation of cell shape	Cell wall/membrane/envelope biogenesis	M	CELLULAR PROCESSES AND SIGNALING
gene0385	Chr1	COG2891	Rod shape-determining protein MreD	Cell wall/membrane/envelope biogenesis	M	CELLULAR PROCESSES AND SIGNALING
gene0386	Chr1	COG0424	Maf-like protein	Cell cycle control, cell division, chromosome partitioning	D	CELLULAR PROCESSES AND SIGNALING
gene1040	Chr1	COG0424	Maf-like protein	Cell cycle control, cell division, chromosome partitioning	D	CELLULAR PROCESSES AND SIGNALING
gene0387	Chr1	COG1530	ribonuclease	Translation, ribosomal structure and biogenesis	J	INFORMATION STORAGE AND PROCESSING
gene1038	Chr1	COG1530	ribonuclease	Translation, ribosomal structure and biogenesis	J	INFORMATION STORAGE AND PROCESSING
gene0388	Chr1	COG3164	exported protein	Function unknown	S	POORLY CHARACTERIZED
gene0389	Chr1	COG0388	nitrilase cyanide hydratase and apolipoprotein n-acyltransferase	Function unknown	S	POORLY CHARACTERIZED
gene2299	Chr1	COG0388	nitrilase cyanide hydratase and apolipoprotein n-acyltransferase	Function unknown	S	POORLY CHARACTERIZED
gene0390	Chr1	COG0312	peptidase U62 modulator of DNA gyrase	Function unknown	S	POORLY CHARACTERIZED
gene2719	Chr1	COG0312	peptidase U62 modulator of DNA gyrase	Function unknown	S	POORLY CHARACTERIZED
gene0391	Chr1	COG2235	Arginine dihydrolase	Amino acid transport and metabolism	E	METABOLISM
gene0392	Chr1	COG3076	Globally modulates RNA abundance by binding to RNase E (Rne) and regulating its endonucleolytic activity. Can modulate Rne action in a substrate-dependent manner by altering the composition of the degradosome (By similarity)	Function unknown	S	POORLY CHARACTERIZED
gene0394	Chr1	COG3205	Membrane	Function unknown	S	POORLY CHARACTERIZED
gene0395	Chr1	COG0589	Universal stress protein	Signal transduction mechanisms	T	CELLULAR PROCESSES AND SIGNALING
gene1490	Chr1	COG0589	Universal stress protein	Signal transduction mechanisms	T	CELLULAR PROCESSES AND SIGNALING
gene3026	Chr1	COG0589	Universal stress protein	Signal transduction mechanisms	T	CELLULAR PROCESSES AND SIGNALING
gene0396	Chr1	COG4666	trap transporter, 4tm 12tm fusion protein	Function unknown	S	POORLY CHARACTERIZED
gene1377	Chr1	COG4666	trap transporter, 4tm 12tm fusion protein	Function unknown	S	POORLY CHARACTERIZED
gene0397	Chr1	COG2358	TRAP transporter, solute receptor (TAXI family	Inorganic ion transport and metabolism	P	METABOLISM
gene1376	Chr1	COG2358	TRAP transporter, solute receptor (TAXI family	Inorganic ion transport and metabolism	P	METABOLISM
gene0398	Chr1	COG1438	Regulates arginine biosynthesis genes (By similarity)	Transcription	K	INFORMATION STORAGE AND PROCESSING
gene0399	Chr1	COG0039	Catalyzes the reversible oxidation of malate to oxaloacetate (By similarity)	Energy production and conversion	C	METABOLISM
gene0401	Chr1	COG0142	synthase	Coenzyme transport and metabolism	H	METABOLISM
gene2202	Chr1	COG0142	synthase	Coenzyme transport and metabolism	H	METABOLISM
gene0402	Chr1	COG0261	This protein binds to 23S rRNA in the presence of protein L20 (By similarity)	Translation, ribosomal structure and biogenesis	J	INFORMATION STORAGE AND PROCESSING
gene0403	Chr1	COG0211	50S ribosomal protein l27	Translation, ribosomal structure and biogenesis	J	INFORMATION STORAGE AND PROCESSING
gene0404	Chr1	COG0536	An essential GTPase which binds GTP, GDP and possibly (p)ppGpp with moderate affinity, with high nucleotide exchange rates and a fairly low GTP hydrolysis rate (By similarity). It may play a role in control of the cell cycle, stress response, ribosome biogenesis and in those bacteria that undergo differentiation, in morphogenesis control	Function unknown	S	POORLY CHARACTERIZED
gene0405	Chr1	COG2966	Membrane	Function unknown	S	POORLY CHARACTERIZED
gene0406	Chr1	COG3610	Membrane	Function unknown	S	POORLY CHARACTERIZED
gene0407	Chr1	COG0262	dihydrofolate reductase activity	Coenzyme transport and metabolism	H	METABOLISM
gene0408	Chr1	COG0639	serine threonine-protein phosphatase	Signal transduction mechanisms	T	CELLULAR PROCESSES AND SIGNALING
gene0409	Chr1	COG2967	ApaG protein	Inorganic ion transport and metabolism	P	METABOLISM
gene0410	Chr1	COG0030	Specifically dimethylates two adjacent adenosines (A1518 and A1519) in the loop of a conserved hairpin near the 3'-end of 16S rRNA in the 30S particle. May play a critical role in biogenesis of 30S subunits (By similarity)	Translation, ribosomal structure and biogenesis	J	INFORMATION STORAGE AND PROCESSING
gene0411	Chr1	COG1995	Catalyzes the NAD(P)-dependent oxidation of 4- (phosphohydroxy)-L-threonine (HTP) into 2-amino-3-oxo-4- (phosphohydroxy)butyric acid which spontaneously decarboxylates to form 3-amino-2-oxopropyl phosphate (AHAP) (By similarity)	Coenzyme transport and metabolism	H	METABOLISM
gene0412	Chr1	COG0760	peptidyl-prolyl cis-trans isomerase	Post-translational modification, protein turnover, chaperones	O	CELLULAR PROCESSES AND SIGNALING
gene0997	Chr1	COG0760	peptidyl-prolyl cis-trans isomerase	Post-translational modification, protein turnover, chaperones	O	CELLULAR PROCESSES AND SIGNALING
gene0413	Chr1	COG1452	involved in the assembly of LPS in the outer leaflet of the outer membrane. Determines N-hexane tolerance and is involved in outer membrane permeability. Essential for envelope biogenesis (By similarity)	Cell wall/membrane/envelope biogenesis	M	CELLULAR PROCESSES AND SIGNALING
gene0414	Chr1	COG1076	protein oligomerization	Post-translational modification, protein turnover, chaperones	O	CELLULAR PROCESSES AND SIGNALING
gene0593	Chr1	COG1076	protein oligomerization	Post-translational modification, protein turnover, chaperones	O	CELLULAR PROCESSES AND SIGNALING
gene0415	Chr1	COG0251	Endoribonuclease LPSP	Translation, ribosomal structure and biogenesis	J	INFORMATION STORAGE AND PROCESSING
gene0901	Chr1	COG0251	Endoribonuclease LPSP	Translation, ribosomal structure and biogenesis	J	INFORMATION STORAGE AND PROCESSING
gene1795	Chr1	COG0251	Endoribonuclease LPSP	Translation, ribosomal structure and biogenesis	J	INFORMATION STORAGE AND PROCESSING
gene2977	Chr1	COG0251	Endoribonuclease LPSP	Translation, ribosomal structure and biogenesis	J	INFORMATION STORAGE AND PROCESSING
gene0416	Chr1	COG1781	Involved in allosteric regulation of aspartate carbamoyltransferase (By similarity)	Nucleotide transport and metabolism	F	METABOLISM
gene0417	Chr1	COG0540	aspartate transcarbamylase	Nucleotide transport and metabolism	F	METABOLISM
gene0418	Chr1	COG0078	ornithine carbamoyltransferase	Amino acid transport and metabolism	E	METABOLISM
gene0419	Chr1	COG1875	Phoh family	Signal transduction mechanisms	T	CELLULAR PROCESSES AND SIGNALING
gene0420	Chr1	COG0553	helicase	Replication, recombination and repair	L	INFORMATION STORAGE AND PROCESSING
gene0421	Chr1	COG1914	H( )-stimulated, divalent metal cation uptake system (By similarity)	Inorganic ion transport and metabolism	P	METABOLISM
gene1573	Chr1	COG1914	H( )-stimulated, divalent metal cation uptake system (By similarity)	Inorganic ion transport and metabolism	P	METABOLISM
gene1736	Chr1	COG1914	H( )-stimulated, divalent metal cation uptake system (By similarity)	Inorganic ion transport and metabolism	P	METABOLISM
gene0422	Chr1	COG0564	pseudouridine synthase activity	Translation, ribosomal structure and biogenesis	J	INFORMATION STORAGE AND PROCESSING
gene0576	Chr1	COG0564	pseudouridine synthase activity	Translation, ribosomal structure and biogenesis	J	INFORMATION STORAGE AND PROCESSING
gene1039	Chr1	COG0564	pseudouridine synthase activity	Translation, ribosomal structure and biogenesis	J	INFORMATION STORAGE AND PROCESSING
gene1876	Chr1	COG0564	pseudouridine synthase activity	Translation, ribosomal structure and biogenesis	J	INFORMATION STORAGE AND PROCESSING
gene2204	Chr1	COG0564	pseudouridine synthase activity	Translation, ribosomal structure and biogenesis	J	INFORMATION STORAGE AND PROCESSING
gene0423	Chr1	COG1052	Dehydrogenase	Energy production and conversion	C	METABOLISM
gene0424	Chr1	COG0525	amino acids such as threonine, to avoid such errors, it has a posttransfer editing activity that hydrolyzes mischarged Thr-tRNA(Val) in a tRNA-dependent manner (By similarity)	Translation, ribosomal structure and biogenesis	J	INFORMATION STORAGE AND PROCESSING
gene0425	Chr1	COG2927	dna polymerase III (Chi subunit)	Replication, recombination and repair	L	INFORMATION STORAGE AND PROCESSING
gene0426	Chr1	COG0260	Presumably involved in the processing and regular turnover of intracellular proteins. Catalyzes the removal of unsubstituted N-terminal amino acids from various peptides (By similarity)	Amino acid transport and metabolism	E	METABOLISM
gene0597	Chr1	COG0260	Presumably involved in the processing and regular turnover of intracellular proteins. Catalyzes the removal of unsubstituted N-terminal amino acids from various peptides (By similarity)	Amino acid transport and metabolism	E	METABOLISM
gene0427	Chr1	COG0795	Permease yjgp yjgq family	Function unknown	S	POORLY CHARACTERIZED
gene0428	Chr1	COG0795	Permease yjgp yjgq family	Function unknown	S	POORLY CHARACTERIZED
gene0430	Chr1	COG0157	nicotinate-nucleotide diphosphorylase (carboxylating) activity	Coenzyme transport and metabolism	H	METABOLISM
gene0431	Chr1	COG3023	n-acetylmuramoyl-l-alanine amidase	Cell wall/membrane/envelope biogenesis	M	CELLULAR PROCESSES AND SIGNALING
gene0432	Chr1	COG0716	Low-potential electron donor to a number of redox enzymes (By similarity)	Energy production and conversion	C	METABOLISM
gene2224	Chr1	COG0716	Low-potential electron donor to a number of redox enzymes (By similarity)	Energy production and conversion	C	METABOLISM
gene3077	Chr1	COG0716	Low-potential electron donor to a number of redox enzymes (By similarity)	Energy production and conversion	C	METABOLISM
gene0433	Chr1	COG4974	Site-specific tyrosine recombinase, which acts by catalyzing the cutting and rejoining of the recombining DNA molecules. The XerC-XerD complex is essential to convert dimers of the bacterial chromosome into monomers to permit their segregation at cell division. It also contributes to the segregational stability of plasmids (By similarity)	Replication, recombination and repair	L	INFORMATION STORAGE AND PROCESSING
gene0434	Chr1	COG1651	Thiol disulfide interchange protein	Post-translational modification, protein turnover, chaperones	O	CELLULAR PROCESSES AND SIGNALING
gene3204	Chr2	COG1651	Thiol disulfide interchange protein	Post-translational modification, protein turnover, chaperones	O	CELLULAR PROCESSES AND SIGNALING
gene0435	Chr1	COG0608	Single-stranded-DNA-specific exonuclease (RecJ)	Replication, recombination and repair	L	INFORMATION STORAGE AND PROCESSING
gene0437	Chr1	COG2186	GntR family transcriptional regulator	Transcription	K	INFORMATION STORAGE AND PROCESSING
gene1149	Chr1	COG2186	GntR family transcriptional regulator	Transcription	K	INFORMATION STORAGE AND PROCESSING
gene0438	Chr1	COG2609	Component of the pyruvate dehydrogenase (PDH) complex, that catalyzes the overall conversion of pyruvate to acetyl-CoA and CO(2) (By similarity)	Energy production and conversion	C	METABOLISM
gene0439	Chr1	COG0508	Dehydrogenase	Energy production and conversion	C	METABOLISM
gene2211	Chr1	COG0508	Dehydrogenase	Energy production and conversion	C	METABOLISM
gene0441	Chr1	ENOG410XUF9	TetR family transcriptional Regulator	Transcription	K	INFORMATION STORAGE AND PROCESSING
gene0443	Chr1	COG0288	carbonic anhydrase	Inorganic ion transport and metabolism	P	METABOLISM
gene0444	Chr1	COG0659	sulfate transporter	Inorganic ion transport and metabolism	P	METABOLISM
gene1037	Chr1	COG0659	sulfate transporter	Inorganic ion transport and metabolism	P	METABOLISM
gene0445	Chr1	COG1131	(ABC) transporter	Defense mechanisms	V	CELLULAR PROCESSES AND SIGNALING
gene0446	Chr1	COG0842	(ABC) transporter	Defense mechanisms	V	CELLULAR PROCESSES AND SIGNALING
gene1564	Chr1	COG0842	(ABC) transporter	Defense mechanisms	V	CELLULAR PROCESSES AND SIGNALING
gene1565	Chr1	COG0842	(ABC) transporter	Defense mechanisms	V	CELLULAR PROCESSES AND SIGNALING
gene0447	Chr1	COG0414	Catalyzes the condensation of pantoate with beta-alanine in an ATP-dependent reaction via a pantoyl-adenylate intermediate (By similarity)	Coenzyme transport and metabolism	H	METABOLISM
gene0448	Chr1	COG0413	Catalyzes the reversible reaction in which hydroxymethyl group from 5,10-methylenetetrahydrofolate is tranferred onto alpha-ketoisovalerate to form ketopantoate (By similarity)	Coenzyme transport and metabolism	H	METABOLISM
gene0449	Chr1	COG0801	2-Amino-4-hydroxy-6-hydroxymethyldihydropteridine pyrophosphokinase	Coenzyme transport and metabolism	H	METABOLISM
gene2640	Chr1	COG0801	2-Amino-4-hydroxy-6-hydroxymethyldihydropteridine pyrophosphokinase	Coenzyme transport and metabolism	H	METABOLISM
gene0450	Chr1	COG0617	Catalyzes the addition and repair of the essential 3'- terminal CCA sequence in tRNAs without using a nucleic acid template. Adds these three nucleotides in the order of C, C, and A to the tRNA nucleotide-73, using CTP and ATP as substrates and producing inorganic pyrophosphate	Translation, ribosomal structure and biogenesis	J	INFORMATION STORAGE AND PROCESSING
gene0451	Chr1	COG0617	Catalyzes the addition and repair of the essential 3'- terminal CCA sequence in tRNAs without using a nucleic acid template. Adds these three nucleotides in the order of C, C, and A to the tRNA nucleotide-73, using CTP and ATP as substrates and producing inorganic pyrophosphate	Translation, ribosomal structure and biogenesis	J	INFORMATION STORAGE AND PROCESSING
gene2531	Chr1	COG0617	Catalyzes the addition and repair of the essential 3'- terminal CCA sequence in tRNAs without using a nucleic acid template. Adds these three nucleotides in the order of C, C, and A to the tRNA nucleotide-73, using CTP and ATP as substrates and producing inorganic pyrophosphate	Translation, ribosomal structure and biogenesis	J	INFORMATION STORAGE AND PROCESSING
gene0452	Chr1	COG0008	Catalyzes the attachment of glutamate to tRNA(Glu) in a two-step reaction glutamate is first activated by ATP to form Glu-AMP and then transferred to the acceptor end of tRNA(Glu) (By similarity)	Translation, ribosomal structure and biogenesis	J	INFORMATION STORAGE AND PROCESSING
gene0743	Chr1	COG0008	Catalyzes the attachment of glutamate to tRNA(Glu) in a two-step reaction glutamate is first activated by ATP to form Glu-AMP and then transferred to the acceptor end of tRNA(Glu) (By similarity)	Translation, ribosomal structure and biogenesis	J	INFORMATION STORAGE AND PROCESSING
gene2227	Chr1	COG0008	Catalyzes the attachment of glutamate to tRNA(Glu) in a two-step reaction glutamate is first activated by ATP to form Glu-AMP and then transferred to the acceptor end of tRNA(Glu) (By similarity)	Translation, ribosomal structure and biogenesis	J	INFORMATION STORAGE AND PROCESSING
gene0453	Chr1	COG1734	Transcription factor that acts by binding directly to the RNA polymerase (RNAP). Required for negative regulation of rRNA expression and positive regulation of several amino acid biosynthesis promoters	Signal transduction mechanisms	T	CELLULAR PROCESSES AND SIGNALING
gene0454	Chr1	COG1489	Sugar fermentation stimulation protein homolog	Function unknown	S	POORLY CHARACTERIZED
gene0455	Chr1	COG1643	helicase	Replication, recombination and repair	L	INFORMATION STORAGE AND PROCESSING
gene1216	Chr1	COG1643	helicase	Replication, recombination and repair	L	INFORMATION STORAGE AND PROCESSING
gene1276	Chr1	COG1643	helicase	Replication, recombination and repair	L	INFORMATION STORAGE AND PROCESSING
gene0456	Chr1	COG0744	penicillin-binding protein	Cell wall/membrane/envelope biogenesis	M	CELLULAR PROCESSES AND SIGNALING
gene0457	Chr1	COG0729	Surface Antigen	Cell wall/membrane/envelope biogenesis	M	CELLULAR PROCESSES AND SIGNALING
gene2731	Chr1	COG0729	Surface Antigen	Cell wall/membrane/envelope biogenesis	M	CELLULAR PROCESSES AND SIGNALING
gene1769	Chr1	COG1752	K07001 NTE family protein	Function unknown	S	POORLY CHARACTERIZED
gene0458	Chr1	COG1049	Aconitate hydratase 2	Energy production and conversion	C	METABOLISM
gene0459	Chr1	COG1929	Glycerate kinase	Carbohydrate transport and metabolism	G	METABOLISM
gene0460	Chr1	COG2610	Gluconate	Amino acid transport and metabolism; Carbohydrate transport and metabolism	E;G	METABOLISM;METABOLISM
gene3019	Chr1	COG2610	Gluconate	Amino acid transport and metabolism; Carbohydrate transport and metabolism	E;G	METABOLISM;METABOLISM
gene0461	Chr1	COG3835	regulatoR	Transcription	K	INFORMATION STORAGE AND PROCESSING
gene0464	Chr1	ENOG411242W	Histidine kinase	Signal transduction mechanisms	T	CELLULAR PROCESSES AND SIGNALING
gene0465	Chr1	COG3112	UPF0231 protein	Function unknown	S	POORLY CHARACTERIZED
gene0467	Chr1	COG0347	Nitrogen regulatory protein pii	Amino acid transport and metabolism	E	METABOLISM
gene0663	Chr1	COG0347	Nitrogen regulatory protein pii	Amino acid transport and metabolism	E	METABOLISM
gene0469	Chr1	COG1840	extracellular solute-binding protein, family 1	Inorganic ion transport and metabolism	P	METABOLISM
gene0470	Chr1	COG1178	ABC transporter (permease)	Inorganic ion transport and metabolism	P	METABOLISM
gene2722	Chr1	COG1178	ABC transporter (permease)	Inorganic ion transport and metabolism	P	METABOLISM
gene0471	Chr1	COG3842	Part of the ABC transporter complex PotABCD involved in spermidine putrescine import. Responsible for energy coupling to the transport system (By similarity)	Amino acid transport and metabolism	E	METABOLISM
gene1485	Chr1	COG3842	Part of the ABC transporter complex PotABCD involved in spermidine putrescine import. Responsible for energy coupling to the transport system (By similarity)	Amino acid transport and metabolism	E	METABOLISM
gene0472	Chr1	COG4321	arylsulfate sulfotransferase-like protein	Function unknown	S	POORLY CHARACTERIZED
gene0473	Chr1	COG0693	PfpI family	Function unknown	S	POORLY CHARACTERIZED
gene0600	Chr1	COG0693	PfpI family	Function unknown	S	POORLY CHARACTERIZED
gene0474	Chr1	COG1109	Catalyzes the conversion of glucosamine-6-phosphate to glucosamine-1-phosphate (By similarity)	Carbohydrate transport and metabolism	G	METABOLISM
gene0505	Chr1	COG1109	Catalyzes the conversion of glucosamine-6-phosphate to glucosamine-1-phosphate (By similarity)	Carbohydrate transport and metabolism	G	METABOLISM
gene3118	Chr2	COG1109	Catalyzes the conversion of glucosamine-6-phosphate to glucosamine-1-phosphate (By similarity)	Carbohydrate transport and metabolism	G	METABOLISM
gene0475	Chr1	COG3459	Glycosyltransferase 36	Carbohydrate transport and metabolism	G	METABOLISM
gene0477	Chr1	COG2971	BadF BadG BcrA BcrD	Carbohydrate transport and metabolism	G	METABOLISM
gene0478	Chr1	ENOG410XSBI	endoglucanase-related protein	Function unknown	S	POORLY CHARACTERIZED
gene0479	Chr1	COG4608	(ABC) transporter	Amino acid transport and metabolism	E	METABOLISM
gene1119	Chr1	COG4608	(ABC) transporter	Amino acid transport and metabolism	E	METABOLISM
gene0480	Chr1	COG0444	(ABC) transporter	Amino acid transport and metabolism; Inorganic ion transport and metabolism	E;P	METABOLISM;METABOLISM
gene1118	Chr1	COG0444	(ABC) transporter	Amino acid transport and metabolism; Inorganic ion transport and metabolism	E;P	METABOLISM;METABOLISM
gene0481	Chr1	COG1173	Binding-protein-dependent transport systems inner membrane component	Inorganic ion transport and metabolism	P	METABOLISM
gene1117	Chr1	COG1173	Binding-protein-dependent transport systems inner membrane component	Inorganic ion transport and metabolism	P	METABOLISM
gene2983	Chr1	COG1173	Binding-protein-dependent transport systems inner membrane component	Inorganic ion transport and metabolism	P	METABOLISM
gene0482	Chr1	COG0601	Binding-protein-dependent transport systems inner membrane component	Inorganic ion transport and metabolism	P	METABOLISM
gene1116	Chr1	COG0601	Binding-protein-dependent transport systems inner membrane component	Inorganic ion transport and metabolism	P	METABOLISM
gene2984	Chr1	COG0601	Binding-protein-dependent transport systems inner membrane component	Inorganic ion transport and metabolism	P	METABOLISM
gene0484	Chr1	COG0784	response regulator	Signal transduction mechanisms	T	CELLULAR PROCESSES AND SIGNALING
gene0486	Chr1	COG0784	response regulator	Signal transduction mechanisms	T	CELLULAR PROCESSES AND SIGNALING
gene1597	Chr1	COG0784	response regulator	Signal transduction mechanisms	T	CELLULAR PROCESSES AND SIGNALING
gene1666	Chr1	COG0784	response regulator	Signal transduction mechanisms	T	CELLULAR PROCESSES AND SIGNALING
gene2076	Chr1	COG0784	response regulator	Signal transduction mechanisms	T	CELLULAR PROCESSES AND SIGNALING
gene2102	Chr1	COG0784	response regulator	Signal transduction mechanisms	T	CELLULAR PROCESSES AND SIGNALING
gene2840	Chr1	COG0784	response regulator	Signal transduction mechanisms	T	CELLULAR PROCESSES AND SIGNALING
gene2842	Chr1	COG0784	response regulator	Signal transduction mechanisms	T	CELLULAR PROCESSES AND SIGNALING
gene0747	Chr1	COG0642	Histidine kinase	Signal transduction mechanisms	T	CELLULAR PROCESSES AND SIGNALING
gene1335	Chr1	COG0642	Histidine kinase	Signal transduction mechanisms	T	CELLULAR PROCESSES AND SIGNALING
gene1379	Chr1	COG0642	Histidine kinase	Signal transduction mechanisms	T	CELLULAR PROCESSES AND SIGNALING
gene0485	Chr1	ENOG410XQBA	Transposase	Replication, recombination and repair	L	INFORMATION STORAGE AND PROCESSING
gene0532	Chr1	ENOG410XQBA	Transposase	Replication, recombination and repair	L	INFORMATION STORAGE AND PROCESSING
gene0721	Chr1	ENOG410XQBA	Transposase	Replication, recombination and repair	L	INFORMATION STORAGE AND PROCESSING
gene0891	Chr1	ENOG410XQBA	Transposase	Replication, recombination and repair	L	INFORMATION STORAGE AND PROCESSING
gene0967	Chr1	ENOG410XQBA	Transposase	Replication, recombination and repair	L	INFORMATION STORAGE AND PROCESSING
gene1107	Chr1	ENOG410XQBA	Transposase	Replication, recombination and repair	L	INFORMATION STORAGE AND PROCESSING
gene1126	Chr1	ENOG410XQBA	Transposase	Replication, recombination and repair	L	INFORMATION STORAGE AND PROCESSING
gene1245	Chr1	ENOG410XQBA	Transposase	Replication, recombination and repair	L	INFORMATION STORAGE AND PROCESSING
gene1511	Chr1	ENOG410XQBA	Transposase	Replication, recombination and repair	L	INFORMATION STORAGE AND PROCESSING
gene1599	Chr1	ENOG410XQBA	Transposase	Replication, recombination and repair	L	INFORMATION STORAGE AND PROCESSING
gene1621	Chr1	ENOG410XQBA	Transposase	Replication, recombination and repair	L	INFORMATION STORAGE AND PROCESSING
gene1627	Chr1	ENOG410XQBA	Transposase	Replication, recombination and repair	L	INFORMATION STORAGE AND PROCESSING
gene1628	Chr1	ENOG410XQBA	Transposase	Replication, recombination and repair	L	INFORMATION STORAGE AND PROCESSING
gene1675	Chr1	ENOG410XQBA	Transposase	Replication, recombination and repair	L	INFORMATION STORAGE AND PROCESSING
gene1698	Chr1	ENOG410XQBA	Transposase	Replication, recombination and repair	L	INFORMATION STORAGE AND PROCESSING
gene1703	Chr1	ENOG410XQBA	Transposase	Replication, recombination and repair	L	INFORMATION STORAGE AND PROCESSING
gene1755	Chr1	ENOG410XQBA	Transposase	Replication, recombination and repair	L	INFORMATION STORAGE AND PROCESSING
gene1774	Chr1	ENOG410XQBA	Transposase	Replication, recombination and repair	L	INFORMATION STORAGE AND PROCESSING
gene1823	Chr1	ENOG410XQBA	Transposase	Replication, recombination and repair	L	INFORMATION STORAGE AND PROCESSING
gene1826	Chr1	ENOG410XQBA	Transposase	Replication, recombination and repair	L	INFORMATION STORAGE AND PROCESSING
gene1873	Chr1	ENOG410XQBA	Transposase	Replication, recombination and repair	L	INFORMATION STORAGE AND PROCESSING
gene1909	Chr1	ENOG410XQBA	Transposase	Replication, recombination and repair	L	INFORMATION STORAGE AND PROCESSING
gene1968	Chr1	ENOG410XQBA	Transposase	Replication, recombination and repair	L	INFORMATION STORAGE AND PROCESSING
gene2281	Chr1	ENOG410XQBA	Transposase	Replication, recombination and repair	L	INFORMATION STORAGE AND PROCESSING
gene2654	Chr1	ENOG410XQBA	Transposase	Replication, recombination and repair	L	INFORMATION STORAGE AND PROCESSING
gene2813	Chr1	ENOG410XQBA	Transposase	Replication, recombination and repair	L	INFORMATION STORAGE AND PROCESSING
gene3201	Chr2	ENOG410XQBA	Transposase	Replication, recombination and repair	L	INFORMATION STORAGE AND PROCESSING
gene0487	Chr1	COG2813	Specifically methylates the guanine in position 1207 of 16S rRNA in the 30S particle (By similarity)	Translation, ribosomal structure and biogenesis	J	INFORMATION STORAGE AND PROCESSING
gene0609	Chr1	COG2813	Specifically methylates the guanine in position 1207 of 16S rRNA in the 30S particle (By similarity)	Translation, ribosomal structure and biogenesis	J	INFORMATION STORAGE AND PROCESSING
gene0488	Chr1	COG0628	Membrane	Function unknown	S	POORLY CHARACTERIZED
gene0809	Chr1	COG0628	Membrane	Function unknown	S	POORLY CHARACTERIZED
gene0490	Chr1	COG0001	Glutamate-1-semialdehyde aminotransferase	Coenzyme transport and metabolism	H	METABOLISM
gene0492	Chr1	COG0845	Efflux transporter rnd family, mfp subunit	Cell wall/membrane/envelope biogenesis	M	CELLULAR PROCESSES AND SIGNALING
gene1137	Chr1	COG0845	Efflux transporter rnd family, mfp subunit	Cell wall/membrane/envelope biogenesis	M	CELLULAR PROCESSES AND SIGNALING
gene1563	Chr1	COG0845	Efflux transporter rnd family, mfp subunit	Cell wall/membrane/envelope biogenesis	M	CELLULAR PROCESSES AND SIGNALING
gene1883	Chr1	COG0845	Efflux transporter rnd family, mfp subunit	Cell wall/membrane/envelope biogenesis	M	CELLULAR PROCESSES AND SIGNALING
gene2337	Chr1	COG0845	Efflux transporter rnd family, mfp subunit	Cell wall/membrane/envelope biogenesis	M	CELLULAR PROCESSES AND SIGNALING
gene2995	Chr1	COG0845	Efflux transporter rnd family, mfp subunit	Cell wall/membrane/envelope biogenesis	M	CELLULAR PROCESSES AND SIGNALING
gene0493	Chr1	COG0841	acriflavin resistance protein	Inorganic ion transport and metabolism	P	METABOLISM
gene1138	Chr1	COG0841	acriflavin resistance protein	Inorganic ion transport and metabolism	P	METABOLISM
gene1882	Chr1	COG0841	acriflavin resistance protein	Inorganic ion transport and metabolism	P	METABOLISM
gene2336	Chr1	COG0841	acriflavin resistance protein	Inorganic ion transport and metabolism	P	METABOLISM
gene2996	Chr1	COG0841	acriflavin resistance protein	Inorganic ion transport and metabolism	P	METABOLISM
gene0494	Chr1	COG0739	peptidase'	Cell wall/membrane/envelope biogenesis	M	CELLULAR PROCESSES AND SIGNALING
gene0564	Chr1	COG0739	peptidase'	Cell wall/membrane/envelope biogenesis	M	CELLULAR PROCESSES AND SIGNALING
gene2632	Chr1	COG0739	peptidase'	Cell wall/membrane/envelope biogenesis	M	CELLULAR PROCESSES AND SIGNALING
gene0495	Chr1	COG0162	Catalyzes the attachment of tyrosine to tRNA(Tyr) in a two-step reaction tyrosine is first activated by ATP to form Tyr- AMP and then transferred to the acceptor end of tRNA(Tyr) (By similarity)	Translation, ribosomal structure and biogenesis	J	INFORMATION STORAGE AND PROCESSING
gene0497	Chr1	COG2027	D-alanyl-D-alanine carboxypeptidase	Cell wall/membrane/envelope biogenesis	M	CELLULAR PROCESSES AND SIGNALING
gene0498	Chr1	COG3203	Membrane	Cell wall/membrane/envelope biogenesis	M	CELLULAR PROCESSES AND SIGNALING
gene0715	Chr1	COG3203	Membrane	Cell wall/membrane/envelope biogenesis	M	CELLULAR PROCESSES AND SIGNALING
gene0741	Chr1	COG3203	Membrane	Cell wall/membrane/envelope biogenesis	M	CELLULAR PROCESSES AND SIGNALING
gene0501	Chr1	COG1534	Rna-binding protein	Translation, ribosomal structure and biogenesis	J	INFORMATION STORAGE AND PROCESSING
gene0502	Chr1	COG0293	Specifically methylates the uridine in position 2552 of 23S rRNA at the 2'-O position of the ribose in the fully assembled 50S ribosomal subunit (By similarity)	Translation, ribosomal structure and biogenesis	J	INFORMATION STORAGE AND PROCESSING
gene0503	Chr1	COG0465	Acts as a processive, ATP-dependent zinc metallopeptidase for both cytoplasmic and membrane proteins. Plays a role in the quality control of integral membrane proteins (By similarity)	Post-translational modification, protein turnover, chaperones	O	CELLULAR PROCESSES AND SIGNALING
gene0504	Chr1	COG0294	dihydropteroate synthase	Coenzyme transport and metabolism	H	METABOLISM
gene3095	Chr2	COG0294	dihydropteroate synthase	Coenzyme transport and metabolism	H	METABOLISM
gene3119	Chr2	COG0294	dihydropteroate synthase	Coenzyme transport and metabolism	H	METABOLISM
gene0506	Chr1	COG1314	Preprotein translocase, subunit SecG	Intracellular trafficking, secretion, and vesicular transport	U	CELLULAR PROCESSES AND SIGNALING
gene0509	Chr1	COG0779	Required for maturation of 30S ribosomal subunits (By similarity)	Function unknown	S	POORLY CHARACTERIZED
gene0510	Chr1	COG0195	Transcription elongation factor NusA	Transcription	K	INFORMATION STORAGE AND PROCESSING
gene0511	Chr1	COG0532	One of the essential components for the initiation of protein synthesis. Protects formylmethionyl-tRNA from spontaneous hydrolysis and promotes its binding to the 30S ribosomal subunits. Also involved in the hydrolysis of GTP during the formation of the 70S ribosomal complex (By similarity)	Translation, ribosomal structure and biogenesis	J	INFORMATION STORAGE AND PROCESSING
gene0512	Chr1	COG0858	Associates with free 30S ribosomal subunits (but not with 30S subunits that are part of 70S ribosomes or polysomes). Essential for efficient processing of 16S rRNA. May interact with the 5'-terminal helix region of 16S rRNA (By similarity)	Translation, ribosomal structure and biogenesis	J	INFORMATION STORAGE AND PROCESSING
gene0513	Chr1	COG0130	Responsible for synthesis of pseudouridine from uracil- 55 in the psi GC loop of transfer RNAs (By similarity)	Translation, ribosomal structure and biogenesis	J	INFORMATION STORAGE AND PROCESSING
gene0514	Chr1	COG4446	Protein of unknown function (DUF1499)	Function unknown	S	POORLY CHARACTERIZED
gene0515	Chr1	COG0493	metal cluster binding	Amino acid transport and metabolism	E	METABOLISM
gene1716	Chr1	COG0493	metal cluster binding	Amino acid transport and metabolism	E	METABOLISM
gene0516	Chr1	COG0070	glutamate synthase	Amino acid transport and metabolism	E	METABOLISM
gene0517	Chr1	COG1242	radical SAM protein	Function unknown	S	POORLY CHARACTERIZED
gene0523	Chr1	COG0667	Aldo keto reductase	Energy production and conversion	C	METABOLISM
gene0525	Chr1	COG3066	Sequence-specific endonuclease that cleaves unmethylated GATC sequences. It is involved in DNA mismatch repair (By similarity)	Replication, recombination and repair	L	INFORMATION STORAGE AND PROCESSING
gene0527	Chr1	COG3605	phosphoenolpyruvate--protein phosphotransferase	Signal transduction mechanisms	T	CELLULAR PROCESSES AND SIGNALING
gene0528	Chr1	COG0730	Membrane	Function unknown	S	POORLY CHARACTERIZED
gene1935	Chr1	COG0730	Membrane	Function unknown	S	POORLY CHARACTERIZED
gene2419	Chr1	COG0730	Membrane	Function unknown	S	POORLY CHARACTERIZED
gene0529	Chr1	COG0682	Transfers the N-acyl diglyceride group on what will become the N-terminal cysteine of membrane lipoproteins (By similarity)	Cell wall/membrane/envelope biogenesis	M	CELLULAR PROCESSES AND SIGNALING
gene0530	Chr1	COG0207	Provides the sole de novo source of dTMP for DNA biosynthesis (By similarity)	Nucleotide transport and metabolism	F	METABOLISM
gene0545	Chr1	COG0207	Provides the sole de novo source of dTMP for DNA biosynthesis (By similarity)	Nucleotide transport and metabolism	F	METABOLISM
gene0537	Chr1	COG0207	Provides the sole de novo source of dTMP for DNA biosynthesis (By similarity)	Nucleotide transport and metabolism	F	METABOLISM
gene0538	Chr1	COG1961	Resolvase	Replication, recombination and repair	L	INFORMATION STORAGE AND PROCESSING
gene2277	Chr1	COG1961	Resolvase	Replication, recombination and repair	L	INFORMATION STORAGE AND PROCESSING
gene0539	Chr1	ENOG41124DV	-	Function unknown	S	POORLY CHARACTERIZED
gene0932	Chr1	ENOG41124DV	-	Function unknown	S	POORLY CHARACTERIZED
gene0540	Chr1	COG0507	exodeoxyribonuclease v alpha	Replication, recombination and repair	L	INFORMATION STORAGE AND PROCESSING
gene0933	Chr1	COG0507	exodeoxyribonuclease v alpha	Replication, recombination and repair	L	INFORMATION STORAGE AND PROCESSING
gene2329	Chr1	COG0507	exodeoxyribonuclease v alpha	Replication, recombination and repair	L	INFORMATION STORAGE AND PROCESSING
gene0542	Chr1	COG0286	type I restriction-modification system	Defense mechanisms	V	CELLULAR PROCESSES AND SIGNALING
gene0817	Chr1	COG0286	type I restriction-modification system	Defense mechanisms	V	CELLULAR PROCESSES AND SIGNALING
gene2272	Chr1	COG0286	type I restriction-modification system	Defense mechanisms	V	CELLULAR PROCESSES AND SIGNALING
gene0543	Chr1	COG0732	Restriction modification system DNA (Specificity	Defense mechanisms	V	CELLULAR PROCESSES AND SIGNALING
gene0816	Chr1	COG0732	Restriction modification system DNA (Specificity	Defense mechanisms	V	CELLULAR PROCESSES AND SIGNALING
gene2273	Chr1	COG0732	Restriction modification system DNA (Specificity	Defense mechanisms	V	CELLULAR PROCESSES AND SIGNALING
gene0544	Chr1	COG0610	Type I site-specific deoxyribonuclease	Defense mechanisms	V	CELLULAR PROCESSES AND SIGNALING
gene0814	Chr1	COG0610	Type I site-specific deoxyribonuclease	Defense mechanisms	V	CELLULAR PROCESSES AND SIGNALING
gene2274	Chr1	COG0610	Type I site-specific deoxyribonuclease	Defense mechanisms	V	CELLULAR PROCESSES AND SIGNALING
gene0546	Chr1	COG1283	Na Pi-cotransporter	Inorganic ion transport and metabolism	P	METABOLISM
gene0547	Chr1	COG0583	Transcriptional regulator	Transcription	K	INFORMATION STORAGE AND PROCESSING
gene2379	Chr1	COG0583	Transcriptional regulator	Transcription	K	INFORMATION STORAGE AND PROCESSING
gene2702	Chr1	COG0583	Transcriptional regulator	Transcription	K	INFORMATION STORAGE AND PROCESSING
gene2999	Chr1	COG0583	Transcriptional regulator	Transcription	K	INFORMATION STORAGE AND PROCESSING
gene3033	Chr1	COG0583	Transcriptional regulator	Transcription	K	INFORMATION STORAGE AND PROCESSING
gene0548	Chr1	COG0640	Transcriptional regulator, arsr family	Transcription	K	INFORMATION STORAGE AND PROCESSING
gene2918	Chr1	COG0640	Transcriptional regulator, arsr family	Transcription	K	INFORMATION STORAGE AND PROCESSING
gene0549	Chr1	COG0268	Binds directly to 16S ribosomal RNA (By similarity)	Translation, ribosomal structure and biogenesis	J	INFORMATION STORAGE AND PROCESSING
gene0550	Chr1	COG0728	Integral membrane protein (MviN	Function unknown	S	POORLY CHARACTERIZED
gene0551	Chr1	COG0196	riboflavin biosynthesis protein ribF	Coenzyme transport and metabolism	H	METABOLISM
gene0552	Chr1	COG0060	amino acids such as valine, to avoid such errors it has two additional distinct tRNA(Ile)-dependent editing activities. One activity is designated as 'pretransfer' editing and involves the hydrolysis of activated Val-AMP. The other activity is designated 'posttransfer' editing and involves deacylation of mischarged Val-tRNA(Ile) (By similarity)	Translation, ribosomal structure and biogenesis	J	INFORMATION STORAGE AND PROCESSING
gene0553	Chr1	COG0597	This protein specifically catalyzes the removal of signal peptides from prolipoproteins (By similarity)	Cell wall/membrane/envelope biogenesis; Intracellular trafficking, secretion, and vesicular transport	M;U	CELLULAR PROCESSES AND SIGNALING;CELLULAR PROCESSES AND SIGNALING
gene0555	Chr1	COG0761	Converts 1-hydroxy-2-methyl-2-(E)-butenyl 4-diphosphate into isopentenyl diphosphate (IPP) and dimethylallyl diphosphate (DMAPP) (By similarity)	Lipid transport and metabolism	I	METABOLISM
gene0556	Chr1	COG1966	carbon starvation protein	Signal transduction mechanisms	T	CELLULAR PROCESSES AND SIGNALING
gene0557	Chr1	ENOG4111Z38	Protein of unknown function (DUF2799)	Function unknown	S	POORLY CHARACTERIZED
gene0558	Chr1	COG2377	Catalyzes the specific phosphorylation of 1,6-anhydro-N- acetylmuramic acid (anhMurNAc) with the simultaneous cleavage of the 1,6-anhydro ring, generating MurNAc-6-P. Is required for the utilization of anhMurNAc either imported from the medium or derived from its own cell wall murein, and thus plays a role in cell wall recycling (By similarity)	Post-translational modification, protein turnover, chaperones	O	CELLULAR PROCESSES AND SIGNALING
gene0559	Chr1	COG1472	hydrolase family 3	Carbohydrate transport and metabolism	G	METABOLISM
gene0560	Chr1	COG3279	Regulator	Signal transduction mechanisms	T	CELLULAR PROCESSES AND SIGNALING
gene1191	Chr1	COG3279	Regulator	Signal transduction mechanisms	T	CELLULAR PROCESSES AND SIGNALING
gene0561	Chr1	COG3275	Histidine kinase	Signal transduction mechanisms	T	CELLULAR PROCESSES AND SIGNALING
gene0562	Chr1	COG0722	Stereospecific condensation of phosphoenolpyruvate (PEP) and D-erythrose-4-phosphate (E4P) giving rise to 3-deoxy-D- arabino-heptulosonate-7-phosphate (DAHP) (By similarity)	Amino acid transport and metabolism	E	METABOLISM
gene1537	Chr1	COG0722	Stereospecific condensation of phosphoenolpyruvate (PEP) and D-erythrose-4-phosphate (E4P) giving rise to 3-deoxy-D- arabino-heptulosonate-7-phosphate (DAHP) (By similarity)	Amino acid transport and metabolism	E	METABOLISM
gene0563	Chr1	COG1605	Chorismate mutase	Amino acid transport and metabolism	E	METABOLISM
gene0572	Chr1	COG1605	Chorismate mutase	Amino acid transport and metabolism	E	METABOLISM
gene0565	Chr1	ENOG41121X5	type IV pilus assembly pilz	Function unknown	S	POORLY CHARACTERIZED
gene0568	Chr1	COG2973	This protein is an aporepressor. When complexed with L- tryptophan it binds the operator region of the trp operon (5'- ACTAGT-'3') and prevents the initiation of transcription. The complex also regulates trp repressor biosynthesis by binding to its regulatory region (By similarity)	Transcription	K	INFORMATION STORAGE AND PROCESSING
gene0569	Chr1	COG1986	Phosphatase that hydrolyzes non-canonical purine nucleotides such as XTP and ITP to their respective diphosphate derivatives. Probably excludes non-canonical purines from DNA precursor pool, thus preventing their incorporation into DNA and avoiding chromosomal lesions	Function unknown	S	POORLY CHARACTERIZED
gene0571	Chr1	COG0687	polyamine binding	Amino acid transport and metabolism	E	METABOLISM
gene1120	Chr1	COG0687	polyamine binding	Amino acid transport and metabolism	E	METABOLISM
gene1481	Chr1	COG0687	polyamine binding	Amino acid transport and metabolism	E	METABOLISM
gene1482	Chr1	COG0687	polyamine binding	Amino acid transport and metabolism	E	METABOLISM
gene0574	Chr1	COG4623	Murein-degrading enzyme that degrades murein glycan strands and insoluble, high-molecular weight murein sacculi, with the concomitant formation of a 1,6-anhydromuramoyl product. Lytic transglycosylases (LTs) play an integral role in the metabolism of the peptidoglycan (PG) sacculus. Their lytic action creates space within the PG sacculus to allow for its expansion as well as for the insertion of …	Cell wall/membrane/envelope biogenesis	M	CELLULAR PROCESSES AND SIGNALING
gene2247	Chr1	COG4623	Murein-degrading enzyme that degrades murein glycan strands and insoluble, high-molecular weight murein sacculi, with the concomitant formation of a 1,6-anhydromuramoyl product. Lytic transglycosylases (LTs) play an integral role in the metabolism of the peptidoglycan (PG) sacculus. Their lytic action creates space within the PG sacculus to allow for its expansion as well as for the insertion of …	Cell wall/membrane/envelope biogenesis	M	CELLULAR PROCESSES AND SIGNALING
gene0575	Chr1	COG4105	Part of the outer membrane protein assembly complex, which is involved in assembly and insertion of beta-barrel proteins into the outer membrane	Cell wall/membrane/envelope biogenesis	M	CELLULAR PROCESSES AND SIGNALING
gene0577	Chr1	COG1496	Multi-copper polyphenol oxidoreductase laccase	Function unknown	S	POORLY CHARACTERIZED
gene0578	Chr1	COG0542	ATP-dependent CLP protease ATP-binding subunit	Post-translational modification, protein turnover, chaperones	O	CELLULAR PROCESSES AND SIGNALING
gene2006	Chr1	COG0542	ATP-dependent CLP protease ATP-binding subunit	Post-translational modification, protein turnover, chaperones	O	CELLULAR PROCESSES AND SIGNALING
gene0587	Chr1	COG0483	inositol monophosphatase	Carbohydrate transport and metabolism	G	METABOLISM
gene0588	Chr1	COG0565	RNA methyltransferase TrmH family, group 1	Translation, ribosomal structure and biogenesis	J	INFORMATION STORAGE AND PROCESSING
gene0589	Chr1	COG1959	Transcriptional regulator, BadM Rrf2 family	Transcription	K	INFORMATION STORAGE AND PROCESSING
gene0590	Chr1	COG1104	cysteine desulfurase	Amino acid transport and metabolism	E	METABOLISM
gene0591	Chr1	COG0822	sUF system Fes assembly protein, NifU family	Energy production and conversion	C	METABOLISM
gene2371	Chr1	COG0822	sUF system Fes assembly protein, NifU family	Energy production and conversion	C	METABOLISM
gene0594	Chr1	COG0443	Heat shock protein	Post-translational modification, protein turnover, chaperones	O	CELLULAR PROCESSES AND SIGNALING
gene0971	Chr1	COG0443	Heat shock protein	Post-translational modification, protein turnover, chaperones	O	CELLULAR PROCESSES AND SIGNALING
gene1207	Chr1	COG0443	Heat shock protein	Post-translational modification, protein turnover, chaperones	O	CELLULAR PROCESSES AND SIGNALING
gene1208	Chr1	COG0443	Heat shock protein	Post-translational modification, protein turnover, chaperones	O	CELLULAR PROCESSES AND SIGNALING
gene1725	Chr1	COG0443	Heat shock protein	Post-translational modification, protein turnover, chaperones	O	CELLULAR PROCESSES AND SIGNALING
gene2258	Chr1	COG0443	Heat shock protein	Post-translational modification, protein turnover, chaperones	O	CELLULAR PROCESSES AND SIGNALING
gene0595	Chr1	COG0633	Ferredoxin	Energy production and conversion	C	METABOLISM
gene1362	Chr1	COG0633	Ferredoxin	Energy production and conversion	C	METABOLISM
gene0596	Chr1	COG2975	Fe-S assembly protein IscX	Function unknown	S	POORLY CHARACTERIZED
gene0598	Chr1	COG0105	Major role in the synthesis of nucleoside triphosphates other than ATP. The ATP gamma phosphate is transferred to the NDP beta phosphate via a ping-pong mechanism, using a phosphorylated active-site intermediate (By similarity)	Nucleotide transport and metabolism	F	METABOLISM
gene0599	Chr1	COG0520	cysteine desulfurase	Amino acid transport and metabolism	E	METABOLISM
gene1270	Chr1	COG0520	cysteine desulfurase	Amino acid transport and metabolism	E	METABOLISM
gene0601	Chr1	COG1893	Catalyzes the NADPH-dependent reduction of ketopantoate into pantoic acid (By similarity)	Coenzyme transport and metabolism	H	METABOLISM
gene0602	Chr1	COG3248	nucleoside-specific channel-forming protein	Cell wall/membrane/envelope biogenesis	M	CELLULAR PROCESSES AND SIGNALING
gene0603	Chr1	COG2802	Peptidase S16, lon domain protein	Post-translational modification, protein turnover, chaperones	O	CELLULAR PROCESSES AND SIGNALING
gene0604	Chr1	COG1595	RNA Polymerase	Transcription	K	INFORMATION STORAGE AND PROCESSING
gene2081	Chr1	COG1595	RNA Polymerase	Transcription	K	INFORMATION STORAGE AND PROCESSING
gene2548	Chr1	COG1595	RNA Polymerase	Transcription	K	INFORMATION STORAGE AND PROCESSING
gene0605	Chr1	COG3806	Factor ChrR	Transcription	K	INFORMATION STORAGE AND PROCESSING
gene0606	Chr1	COG0477	major facilitator Superfamily	Carbohydrate transport and metabolism	G	METABOLISM
gene1334	Chr1	COG0477	major facilitator Superfamily	Carbohydrate transport and metabolism	G	METABOLISM
gene1733	Chr1	COG0477	major facilitator Superfamily	Carbohydrate transport and metabolism	G	METABOLISM
gene2915	Chr1	COG0477	major facilitator Superfamily	Carbohydrate transport and metabolism	G	METABOLISM
gene0607	Chr1	COG0652	peptidyl-prolyl cis-trans isomerase activity	Post-translational modification, protein turnover, chaperones	O	CELLULAR PROCESSES AND SIGNALING
gene2045	Chr1	COG0652	peptidyl-prolyl cis-trans isomerase activity	Post-translational modification, protein turnover, chaperones	O	CELLULAR PROCESSES AND SIGNALING
gene0608	Chr1	COG3056	(LipO)protein	Cell wall/membrane/envelope biogenesis	M	CELLULAR PROCESSES AND SIGNALING
gene0610	Chr1	COG0271	Bola-like protein	Signal transduction mechanisms	T	CELLULAR PROCESSES AND SIGNALING
gene0611	Chr1	COG1726	NQR complex catalyzes the reduction of ubiquinone-1 to ubiquinol by two successive reactions, coupled with the transport of Na( ) ions from the cytoplasm to the periplasm. NqrA to NqrE are probably involved in the second step, the conversion of ubisemiquinone to ubiquinol (By similarity)	Energy production and conversion	C	METABOLISM
gene0612	Chr1	COG1805	NQR complex catalyzes the reduction of ubiquinone-1 to ubiquinol by two successive reactions, coupled with the transport of Na( ) ions from the cytoplasm to the periplasm. NqrA to NqrE are probably involved in the second step, the conversion of ubisemiquinone to ubiquinol (By similarity)	Energy production and conversion	C	METABOLISM
gene0613	Chr1	COG2869	NQR complex catalyzes the reduction of ubiquinone-1 to ubiquinol by two successive reactions, coupled with the transport of Na( ) ions from the cytoplasm to the periplasm. NqrA to NqrE are probably involved in the second step, the conversion of ubisemiquinone to ubiquinol (By similarity)	Energy production and conversion	C	METABOLISM
gene0614	Chr1	COG1347	NQR complex catalyzes the reduction of ubiquinone-1 to ubiquinol by two successive reactions, coupled with the transport of Na( ) ions from the cytoplasm to the periplasm. NqrA to NqrE are probably involved in the second step, the conversion of ubisemiquinone to ubiquinol (By similarity)	Energy production and conversion	C	METABOLISM
gene0615	Chr1	COG2209	NQR complex catalyzes the reduction of ubiquinone-1 to ubiquinol by two successive reactions, coupled with the transport of Na( ) ions from the cytoplasm to the periplasm. NqrA to NqrE are probably involved in the second step, the conversion of ubisemiquinone to ubiquinol (By similarity)	Energy production and conversion	C	METABOLISM
gene0616	Chr1	COG2871	2 iron, 2 sulfur cluster binding	Energy production and conversion	C	METABOLISM
gene0617	Chr1	COG1477	(LipO)protein	Coenzyme transport and metabolism	H	METABOLISM
gene0618	Chr1	COG2991	Periplasmic Protein	Function unknown	S	POORLY CHARACTERIZED
gene0620	Chr1	COG0389	Poorly processive error-prone DNA polymerase involved in untargeted mutagenesis. Copies undamaged DNA at stalled replication forks which arise in vivo from mismatched or misaligned primer ends. These misaligned primers can be extended by polIV. Exhibits no 3-5 exonuclease (proofreading) activity. May be involved in translesional synthesis in conjunction with the beta clamp from polIII (By similar…	Replication, recombination and repair	L	INFORMATION STORAGE AND PROCESSING
gene1062	Chr1	COG0389	Poorly processive error-prone DNA polymerase involved in untargeted mutagenesis. Copies undamaged DNA at stalled replication forks which arise in vivo from mismatched or misaligned primer ends. These misaligned primers can be extended by polIV. Exhibits no 3-5 exonuclease (proofreading) activity. May be involved in translesional synthesis in conjunction with the beta clamp from polIII (By similar…	Replication, recombination and repair	L	INFORMATION STORAGE AND PROCESSING
gene3121	Chr2	COG0389	Poorly processive error-prone DNA polymerase involved in untargeted mutagenesis. Copies undamaged DNA at stalled replication forks which arise in vivo from mismatched or misaligned primer ends. These misaligned primers can be extended by polIV. Exhibits no 3-5 exonuclease (proofreading) activity. May be involved in translesional synthesis in conjunction with the beta clamp from polIII (By similar…	Replication, recombination and repair	L	INFORMATION STORAGE AND PROCESSING
gene0622	Chr1	ENOG411221H	methyl-accepting chemotaxis protein	Function unknown	S	POORLY CHARACTERIZED
gene0623	Chr1	COG0733	Transporter	Inorganic ion transport and metabolism	P	METABOLISM
gene1056	Chr1	COG0733	Transporter	Inorganic ion transport and metabolism	P	METABOLISM
gene1878	Chr1	COG0733	Transporter	Inorganic ion transport and metabolism	P	METABOLISM
gene0624	Chr1	COG3608	succinylglutamate desuccinylase aspartoacylase	Function unknown	S	POORLY CHARACTERIZED
gene0625	Chr1	COG0189	Responsible for the addition of glutamate residues to the C-terminus of ribosomal protein S6 (By similarity)	Coenzyme transport and metabolism; Translation, ribosomal structure and biogenesis	H;J	METABOLISM;INFORMATION STORAGE AND PROCESSING
gene2716	Chr1	COG0189	Responsible for the addition of glutamate residues to the C-terminus of ribosomal protein S6 (By similarity)	Coenzyme transport and metabolism; Translation, ribosomal structure and biogenesis	H;J	METABOLISM;INFORMATION STORAGE AND PROCESSING
gene0626	Chr1	COG4067	ribosomal protein S6 modification protein	Post-translational modification, protein turnover, chaperones	O	CELLULAR PROCESSES AND SIGNALING
gene2018	Chr1	COG4067	ribosomal protein S6 modification protein	Post-translational modification, protein turnover, chaperones	O	CELLULAR PROCESSES AND SIGNALING
gene0627	Chr1	COG2195	Cleaves the N-terminal amino acid of tripeptides (By similarity)	Amino acid transport and metabolism	E	METABOLISM
gene1640	Chr1	COG2195	Cleaves the N-terminal amino acid of tripeptides (By similarity)	Amino acid transport and metabolism	E	METABOLISM
gene0629	Chr1	COG0503	Catalyzes a salvage reaction resulting in the formation of AMP, that is energically less costly than de novo synthesis (By similarity)	Nucleotide transport and metabolism	F	METABOLISM
gene2073	Chr1	COG0503	Catalyzes a salvage reaction resulting in the formation of AMP, that is energically less costly than de novo synthesis (By similarity)	Nucleotide transport and metabolism	F	METABOLISM
gene0630	Chr1	COG1073	Hydrolase	Function unknown	S	POORLY CHARACTERIZED
gene0631	Chr1	ENOG4111IQF	Binds to the sigma-S subunit of RNA polymerase, activating expression of sigma-S-regulated genes. Stimulates RNA polymerase holoenzyme formation and may bind to several other sigma factors, such as sigma-70 and sigma-32 (By similarity)	Transcription	K	INFORMATION STORAGE AND PROCESSING
gene0632	Chr1	COG0263	Catalyzes the transfer of a phosphate group to glutamate to form glutamate 5-phosphate which rapidly cyclizes to 5- oxoproline (By similarity)	Amino acid transport and metabolism	E	METABOLISM
gene0633	Chr1	COG0014	Catalyzes the NADPH dependent reduction of L-gamma- glutamyl 5-phosphate into L-glutamate 5-semialdehyde and phosphate. The product spontaneously undergoes cyclization to form 1-pyrroline-5-carboxylate (By similarity)	Amino acid transport and metabolism	E	METABOLISM
gene0634	Chr1	COG1327	Negatively regulates transcription of bacterial ribonucleotide reductase nrd genes and operons by binding to NrdR- boxes (By similarity)	Transcription	K	INFORMATION STORAGE AND PROCESSING
gene0635	Chr1	COG0117	Converts 2,5-diamino-6-(ribosylamino)-4(3h)-pyrimidinone 5'-phosphate into 5-amino-6-(ribosylamino)-2,4(1h,3h)- pyrimidinedione 5'-phosphate (By similarity)	Coenzyme transport and metabolism	H	METABOLISM
gene0636	Chr1	COG0307	riboflavin synthase, subunit alpha	Coenzyme transport and metabolism	H	METABOLISM
gene1444	Chr1	COG0307	riboflavin synthase, subunit alpha	Coenzyme transport and metabolism	H	METABOLISM
gene0637	Chr1	COG0108	Catalyzes the conversion of D-ribulose 5-phosphate to formate and 3,4-dihydroxy-2-butanone 4-phosphate (By similarity)	Coenzyme transport and metabolism	H	METABOLISM
gene1433	Chr1	COG0108	Catalyzes the conversion of D-ribulose 5-phosphate to formate and 3,4-dihydroxy-2-butanone 4-phosphate (By similarity)	Coenzyme transport and metabolism	H	METABOLISM
gene1302	Chr1	COG0807	Catalyzes the conversion of D-ribulose 5-phosphate to formate and 3,4-dihydroxy-2-butanone 4-phosphate (By similarity)	Coenzyme transport and metabolism	H	METABOLISM
gene0638	Chr1	COG0054	Catalyzes the formation of 6,7-dimethyl-8- ribityllumazine by condensation of 5-amino-6-(D- ribitylamino)uracil with 3,4-dihydroxy-2-butanone 4-phosphate. This is the penultimate step in the biosynthesis of riboflavin (By similarity)	Coenzyme transport and metabolism	H	METABOLISM
gene0639	Chr1	COG0781	DNA-dependent transcription, termination	Transcription	K	INFORMATION STORAGE AND PROCESSING
gene0640	Chr1	COG0611	Catalyzes the ATP-dependent phosphorylation of thiamine- monophosphate (TMP) to form thiamine-pyrophosphate (TPP), the active form of vitamin B1 (By similarity)	Coenzyme transport and metabolism	H	METABOLISM
gene0641	Chr1	COG1267	phosphatidylglycerophosphatase a	Lipid transport and metabolism	I	METABOLISM
gene0642	Chr1	ENOG4111GD2	UPF0325 protein	Function unknown	S	POORLY CHARACTERIZED
gene0643	Chr1	COG2844	Modifies, by uridylylation or deuridylylation the PII (GlnB) regulatory protein (By similarity)	Post-translational modification, protein turnover, chaperones	O	CELLULAR PROCESSES AND SIGNALING
gene0644	Chr1	COG0024	Removes the N-terminal methionine from nascent proteins (By similarity)	Translation, ribosomal structure and biogenesis	J	INFORMATION STORAGE AND PROCESSING
gene0645	Chr1	COG0052	30S ribosomal protein S2	Translation, ribosomal structure and biogenesis	J	INFORMATION STORAGE AND PROCESSING
gene0646	Chr1	COG0264	Associates with the EF-Tu.GDP complex and induces the exchange of GDP to GTP. It remains bound to the aminoacyl-tRNA.EF- Tu.GTP complex up to the GTP hydrolysis stage on the ribosome (By similarity)	Translation, ribosomal structure and biogenesis	J	INFORMATION STORAGE AND PROCESSING
gene0647	Chr1	COG0528	UMP kinase activity	Nucleotide transport and metabolism	F	METABOLISM
gene0648	Chr1	COG0233	Responsible for the release of ribosomes from messenger RNA at the termination of protein biosynthesis. May increase the efficiency of translation by recycling ribosomes from one round of translation to another (By similarity)	Translation, ribosomal structure and biogenesis	J	INFORMATION STORAGE AND PROCESSING
gene0649	Chr1	COG0020	Catalyzes the condensation of isopentenyl diphosphate (IPP) with allylic pyrophosphates generating different type of terpenoids (By similarity)	Lipid transport and metabolism	I	METABOLISM
gene0650	Chr1	COG0575	phosphatidate Cytidylyltransferase	Lipid transport and metabolism	I	METABOLISM
gene0651	Chr1	COG0743	Catalyzes the NADP-dependent rearrangement and reduction of 1-deoxy-D-xylulose-5-phosphate (DXP) to 2-C-methyl-D-erythritol 4-phosphate (MEP) (By similarity)	Lipid transport and metabolism	I	METABOLISM
gene0652	Chr1	COG0750	Membrane-associated zinc metalloprotease	Cell wall/membrane/envelope biogenesis	M	CELLULAR PROCESSES AND SIGNALING
gene0653	Chr1	COG4775	Gram-negative-bacterium-type cell outer membrane assembly	Cell wall/membrane/envelope biogenesis	M	CELLULAR PROCESSES AND SIGNALING
gene0654	Chr1	COG2825	Molecular chaperone that interacts specifically with outer membrane proteins, thus maintaining the solubility of early folding intermediates during passage through the periplasm (By similarity)	Cell wall/membrane/envelope biogenesis	M	CELLULAR PROCESSES AND SIGNALING
gene0655	Chr1	COG1044	Catalyzes the N-acylation of UDP-3-O-acylglucosamine using 3-hydroxyacyl-ACP as the acyl donor. Is involved in the biosynthesis of lipid A, a phosphorylated glycolipid that anchors the lipopolysaccharide to the outer membrane of the cell (By similarity)	Cell wall/membrane/envelope biogenesis	M	CELLULAR PROCESSES AND SIGNALING
gene0656	Chr1	COG0764	Involved in unsaturated fatty acids biosynthesis. Catalyzes the dehydration of short chain beta-hydroxyacyl-ACPs and long chain saturated and unsaturated beta-hydroxyacyl-ACPs (By similarity)	Lipid transport and metabolism	I	METABOLISM
gene1516	Chr1	COG0764	Involved in unsaturated fatty acids biosynthesis. Catalyzes the dehydration of short chain beta-hydroxyacyl-ACPs and long chain saturated and unsaturated beta-hydroxyacyl-ACPs (By similarity)	Lipid transport and metabolism	I	METABOLISM
gene0657	Chr1	COG1043	Involved in the biosynthesis of lipid A, a phosphorylated glycolipid that anchors the lipopolysaccharide to the outer membrane of the cell (By similarity)	Cell wall/membrane/envelope biogenesis	M	CELLULAR PROCESSES AND SIGNALING
gene0658	Chr1	COG0763	Condensation of UDP-2,3-diacylglucosamine and 2,3- diacylglucosamine-1-phosphate to form lipid A disaccharide, a precursor of lipid A, a phosphorylated glycolipid that anchors the lipopolysaccharide to the outer membrane of the cell (By similarity)	Cell wall/membrane/envelope biogenesis	M	CELLULAR PROCESSES AND SIGNALING
gene0659	Chr1	COG0164	Endonuclease that specifically degrades the RNA of RNA- DNA hybrids (By similarity)	Replication, recombination and repair	L	INFORMATION STORAGE AND PROCESSING
gene0660	Chr1	COG0587	DNA polymerase III (alpha subunit)	Replication, recombination and repair	L	INFORMATION STORAGE AND PROCESSING
gene1061	Chr1	COG0587	DNA polymerase III (alpha subunit)	Replication, recombination and repair	L	INFORMATION STORAGE AND PROCESSING
gene0661	Chr1	COG0825	Component of the acetyl coenzyme A carboxylase (ACC) complex. First, biotin carboxylase catalyzes the carboxylation of biotin on its carrier protein (BCCP) and then the CO(2) group is transferred by the carboxyltransferase to acetyl-CoA to form malonyl-CoA (By similarity)	Lipid transport and metabolism	I	METABOLISM
gene0662	Chr1	COG0037	Ligates lysine onto the cytidine present at position 34 of the AUA codon-specific tRNA(Ile) that contains the anticodon CAU, in an ATP-dependent manner. Cytidine is converted to lysidine, thus changing the amino acid specificity of the tRNA from methionine to isoleucine (By similarity)	Cell cycle control, cell division, chromosome partitioning	D	CELLULAR PROCESSES AND SIGNALING
gene1489	Chr1	COG0037	Ligates lysine onto the cytidine present at position 34 of the AUA codon-specific tRNA(Ile) that contains the anticodon CAU, in an ATP-dependent manner. Cytidine is converted to lysidine, thus changing the amino acid specificity of the tRNA from methionine to isoleucine (By similarity)	Cell cycle control, cell division, chromosome partitioning	D	CELLULAR PROCESSES AND SIGNALING
gene0664	Chr1	COG3021	endonuclease exonuclease phosphatase	Function unknown	S	POORLY CHARACTERIZED
gene0665	Chr1	ENOG41129G7	Protein of unknown function (DUF1282)	Function unknown	S	POORLY CHARACTERIZED
gene0667	Chr1	COG0491	Beta-lactamase domain protein	Function unknown	S	POORLY CHARACTERIZED
gene1310	Chr1	COG0491	Beta-lactamase domain protein	Function unknown	S	POORLY CHARACTERIZED
gene0668	Chr1	COG0500	Methyltransferase	Secondary metabolites biosynthesis, transport and catabolism	Q	METABOLISM
gene1800	Chr1	COG0500	Methyltransferase	Secondary metabolites biosynthesis, transport and catabolism	Q	METABOLISM
gene1926	Chr1	COG0500	Methyltransferase	Secondary metabolites biosynthesis, transport and catabolism	Q	METABOLISM
gene2016	Chr1	COG0500	Methyltransferase	Secondary metabolites biosynthesis, transport and catabolism	Q	METABOLISM
gene2017	Chr1	COG0500	Methyltransferase	Secondary metabolites biosynthesis, transport and catabolism	Q	METABOLISM
gene2024	Chr1	COG0500	Methyltransferase	Secondary metabolites biosynthesis, transport and catabolism	Q	METABOLISM
gene2054	Chr1	COG0500	Methyltransferase	Secondary metabolites biosynthesis, transport and catabolism	Q	METABOLISM
gene0669	Chr1	COG0328	ribonuclease H activity	Replication, recombination and repair	L	INFORMATION STORAGE AND PROCESSING
gene1760	Chr1	COG0328	ribonuclease H activity	Replication, recombination and repair	L	INFORMATION STORAGE AND PROCESSING
gene0670	Chr1	COG0847	DNA polymerase iii	Replication, recombination and repair	L	INFORMATION STORAGE AND PROCESSING
gene0834	Chr1	COG0847	DNA polymerase iii	Replication, recombination and repair	L	INFORMATION STORAGE AND PROCESSING
gene2845	Chr1	COG0847	DNA polymerase iii	Replication, recombination and repair	L	INFORMATION STORAGE AND PROCESSING
gene0671	Chr1	ENOG4111PY3	von Willebrand factor type A	Function unknown	S	POORLY CHARACTERIZED
gene0672	Chr1	COG3385	transposase	Replication, recombination and repair	L	INFORMATION STORAGE AND PROCESSING
gene1720	Chr1	COG3385	transposase	Replication, recombination and repair	L	INFORMATION STORAGE AND PROCESSING
gene2933	Chr1	COG3385	transposase	Replication, recombination and repair	L	INFORMATION STORAGE AND PROCESSING
gene0673	Chr1	COG1960	acyl-CoA dehydrogenase	Lipid transport and metabolism	I	METABOLISM
gene1944	Chr1	COG1960	acyl-CoA dehydrogenase	Lipid transport and metabolism	I	METABOLISM
gene0674	Chr1	COG0279	D-glycero-D-manno-heptose 7-phosphate metabolic process	Carbohydrate transport and metabolism	G	METABOLISM
gene2445	Chr1	COG0279	D-glycero-D-manno-heptose 7-phosphate metabolic process	Carbohydrate transport and metabolism	G	METABOLISM
gene0675	Chr1	COG0121	Glutamine amidotransferase	Function unknown	S	POORLY CHARACTERIZED
gene0676	Chr1	COG0442	Catalyzes the attachment of proline to tRNA(Pro) in a two-step reaction proline is first activated by ATP to form Pro- AMP and then transferred to the acceptor end of tRNA(Pro). As ProRS can inadvertently accommodate and process non-cognate amino acids such as alanine and cysteine, to avoid such errors it has two additional distinct editing activities against alanine. One activity is designated a…	Translation, ribosomal structure and biogenesis	J	INFORMATION STORAGE AND PROCESSING
gene0677	Chr1	COG1720	family UPF0066	Function unknown	S	POORLY CHARACTERIZED
gene0679	Chr1	COG1464	(Lipo)protein	Inorganic ion transport and metabolism	P	METABOLISM
gene0680	Chr1	COG2011	ABC transporter (permease)	Inorganic ion transport and metabolism	P	METABOLISM
gene0681	Chr1	COG1135	Part of the ABC transporter complex MetNIQ involved in methionine import. Responsible for energy coupling to the transport system (By similarity)	Inorganic ion transport and metabolism	P	METABOLISM
gene0682	Chr1	COG0241	histidinol-phosphatase activity	Amino acid transport and metabolism	E	METABOLISM
gene1902	Chr1	COG0241	histidinol-phosphatase activity	Amino acid transport and metabolism	E	METABOLISM
gene0683	Chr1	ENOG410Y0XP	Membrane-bound lysozyme-inhibitor of c-type lysozyme	Function unknown	S	POORLY CHARACTERIZED
gene0685	Chr1	COG1284	membrane	Function unknown	S	POORLY CHARACTERIZED
gene0686	Chr1	COG0112	Catalyzes the reversible interconversion of serine and glycine with tetrahydrofolate (THF) serving as the one-carbon carrier. This reaction serves as the major source of one-carbon groups required for the biosynthesis of purines, thymidylate, methionine, and other important biomolecules. Also exhibits THF- independent aldolase activity toward beta-hydroxyamino acids, producing glycine and aldehyd…	Amino acid transport and metabolism	E	METABOLISM
gene0688	Chr1	COG0320	Catalyzes the radical-mediated insertion of two sulfur atoms into the C-6 and C-8 positions of the octanoyl moiety bound to the lipoyl domains of lipoate-dependent enzymes, thereby converting the octanoylated domains into lipoylated derivatives (By similarity)	Coenzyme transport and metabolism	H	METABOLISM
gene0689	Chr1	COG0321	Catalyzes the transfer of endogenously produced octanoic acid from octanoyl-acyl-carrier-protein onto the lipoyl domains of lipoate-dependent enzymes. Lipoyl-ACP can also act as a substrate although octanoyl-ACP is likely to be the physiological substrate (By similarity)	Coenzyme transport and metabolism	H	METABOLISM
gene0690	Chr1	COG2921	UPF0250 protein	Function unknown	S	POORLY CHARACTERIZED
gene0692	Chr1	COG1686	Carboxypeptidase	Cell wall/membrane/envelope biogenesis	M	CELLULAR PROCESSES AND SIGNALING
gene0693	Chr1	COG0797	rare lipoprotein A	Cell wall/membrane/envelope biogenesis	M	CELLULAR PROCESSES AND SIGNALING
gene0694	Chr1	COG0772	Cell Division Protein	Cell cycle control, cell division, chromosome partitioning	D	CELLULAR PROCESSES AND SIGNALING
gene2432	Chr1	COG0772	Cell Division Protein	Cell cycle control, cell division, chromosome partitioning	D	CELLULAR PROCESSES AND SIGNALING
gene0695	Chr1	COG0768	penicillin-binding protein	Cell wall/membrane/envelope biogenesis	M	CELLULAR PROCESSES AND SIGNALING
gene2437	Chr1	COG0768	penicillin-binding protein	Cell wall/membrane/envelope biogenesis	M	CELLULAR PROCESSES AND SIGNALING
gene0696	Chr1	COG1576	rRNA processing	Function unknown	S	POORLY CHARACTERIZED
gene0697	Chr1	COG0799	Functions as a ribosomal silencing factor. Interacts with ribosomal protein L14 (rplN), blocking formation of intersubunit bridge B8. Prevents association of the 30S and 50S ribosomal subunits and the formation of functional ribosomes, thus repressing translation (By similarity)	Function unknown	S	POORLY CHARACTERIZED
gene0698	Chr1	COG1466	DNA polymerase III (delta' subunit)	Replication, recombination and repair	L	INFORMATION STORAGE AND PROCESSING
gene0699	Chr1	COG2980	Rare lipoprotein B	Cell wall/membrane/envelope biogenesis	M	CELLULAR PROCESSES AND SIGNALING
gene0700	Chr1	COG0495	Leucyl-trna synthetase	Translation, ribosomal structure and biogenesis	J	INFORMATION STORAGE AND PROCESSING
gene0701	Chr1	ENOG4111W9T	Protein of unknown function (DUF1451)	Function unknown	S	POORLY CHARACTERIZED
gene0702	Chr1	COG0815	Transfers the fatty acyl group on membrane lipoproteins (By similarity)	Cell wall/membrane/envelope biogenesis	M	CELLULAR PROCESSES AND SIGNALING
gene0703	Chr1	COG4535	Magnesium and cobalt efflux protein	Inorganic ion transport and metabolism	P	METABOLISM
gene0704	Chr1	COG0319	metalloendopeptidase activity	Function unknown	S	POORLY CHARACTERIZED
gene0705	Chr1	COG1702	Phoh family	Signal transduction mechanisms	T	CELLULAR PROCESSES AND SIGNALING
gene0706	Chr1	COG0621	Catalyzes the methylthiolation of N6- (dimethylallyl)adenosine (i(6)A), leading to the formation of 2- methylthio-N6-(dimethylallyl)adenosine (ms(2)i(6)A) at position 37 in tRNAs that read codons beginning with uridine (By similarity)	Translation, ribosomal structure and biogenesis	J	INFORMATION STORAGE AND PROCESSING
gene0707	Chr1	COG0654	oxidoreductase activity, acting on paired donors, with incorporation or reduction of molecular oxygen, NAD(P)H as one donor, and incorporation of one atom of oxygen	Energy production and conversion; Coenzyme transport and metabolism	C;H	METABOLISM;METABOLISM
gene2556	Chr1	COG0654	oxidoreductase activity, acting on paired donors, with incorporation or reduction of molecular oxygen, NAD(P)H as one donor, and incorporation of one atom of oxygen	Energy production and conversion; Coenzyme transport and metabolism	C;H	METABOLISM;METABOLISM
gene2557	Chr1	COG0654	oxidoreductase activity, acting on paired donors, with incorporation or reduction of molecular oxygen, NAD(P)H as one donor, and incorporation of one atom of oxygen	Energy production and conversion; Coenzyme transport and metabolism	C;H	METABOLISM;METABOLISM
gene0708	Chr1	COG2190	pts system	Carbohydrate transport and metabolism	G	METABOLISM
gene0709	Chr1	COG1080	General (non sugar-specific) component of the phosphoenolpyruvate-dependent sugar phosphotransferase system (sugar PTS). This major carbohydrate active-transport system catalyzes the phosphorylation of incoming sugar substrates concomitantly with their translocation across the cell membrane. Enzyme I transfers the phosphoryl group from phosphoenolpyruvate (PEP) to the phosphoryl carrier protein (…	Carbohydrate transport and metabolism	G	METABOLISM
gene0711	Chr1	COG0031	cysteine biosynthetic process from serine	Amino acid transport and metabolism	E	METABOLISM
gene1097	Chr1	COG0031	cysteine biosynthetic process from serine	Amino acid transport and metabolism	E	METABOLISM
gene0712	Chr1	COG2981	Sulfate transport protein CysZ	Amino acid transport and metabolism	E	METABOLISM
gene0713	Chr1	COG3115	receptor for the septal ring structure, may anchor it to the inner-membrane (By similarity)	Cell cycle control, cell division, chromosome partitioning	D	CELLULAR PROCESSES AND SIGNALING
gene0714	Chr1	COG0272	DNA ligase (NAD+) activity	Replication, recombination and repair	L	INFORMATION STORAGE AND PROCESSING
gene0718	Chr1	COG1585	Membrane	Post-translational modification, protein turnover, chaperones; Intracellular trafficking, secretion, and vesicular transport	O;U	CELLULAR PROCESSES AND SIGNALING;CELLULAR PROCESSES AND SIGNALING
gene0719	Chr1	COG0330	Band 7 protein	Post-translational modification, protein turnover, chaperones	O	CELLULAR PROCESSES AND SIGNALING
gene2764	Chr1	COG0330	Band 7 protein	Post-translational modification, protein turnover, chaperones	O	CELLULAR PROCESSES AND SIGNALING
gene2765	Chr1	COG0330	Band 7 protein	Post-translational modification, protein turnover, chaperones	O	CELLULAR PROCESSES AND SIGNALING
gene0720	Chr1	COG3118	Thioredoxin	Post-translational modification, protein turnover, chaperones	O	CELLULAR PROCESSES AND SIGNALING
gene0722	Chr1	COG3118	Thioredoxin	Post-translational modification, protein turnover, chaperones	O	CELLULAR PROCESSES AND SIGNALING
gene0724	Chr1	COG1090	Epimerase	Function unknown	S	POORLY CHARACTERIZED
gene0725	Chr1	ENOG410XPGN	Membrane	Function unknown	S	POORLY CHARACTERIZED
gene0726	Chr1	ENOG410XPGN	Membrane	Function unknown	S	POORLY CHARACTERIZED
gene0727	Chr1	ENOG4111PAT	Nitrogen regulatory protein pii	Function unknown	S	POORLY CHARACTERIZED
gene0729	Chr1	COG0622	Phosphodiesterase, mj0936 family	Function unknown	S	POORLY CHARACTERIZED
gene0730	Chr1	COG3526	selenoprotein	Post-translational modification, protein turnover, chaperones	O	CELLULAR PROCESSES AND SIGNALING
gene0731	Chr1	ENOG410XPA2	permease	Function unknown	S	POORLY CHARACTERIZED
gene0733	Chr1	COG3710	Transcriptional regulator	Transcription	K	INFORMATION STORAGE AND PROCESSING
gene0734	Chr1	COG0326	Molecular chaperone. Has ATPase activity (By similarity)	Post-translational modification, protein turnover, chaperones	O	CELLULAR PROCESSES AND SIGNALING
gene0735	Chr1	COG0563	Catalyzes the reversible transfer of the terminal phosphate group between ATP and AMP. Plays an important role in cellular energy homeostasis and in adenine nucleotide metabolism (By similarity)	Nucleotide transport and metabolism	F	METABOLISM
gene0736	Chr1	COG0276	Catalyzes the ferrous insertion into protoporphyrin IX (By similarity)	Coenzyme transport and metabolism	H	METABOLISM
gene0738	Chr1	COG3019	metal-binding protein	Function unknown	S	POORLY CHARACTERIZED
gene0739	Chr1	COG2217	p-type ATPase	Inorganic ion transport and metabolism	P	METABOLISM
gene0860	Chr1	COG2217	p-type ATPase	Inorganic ion transport and metabolism	P	METABOLISM
gene1494	Chr1	COG2217	p-type ATPase	Inorganic ion transport and metabolism	P	METABOLISM
gene0742	Chr1	ENOG410XVZS	UPF0319 protein	Function unknown	S	POORLY CHARACTERIZED
gene0744	Chr1	COG2885	Ompa motb domain protein	Cell wall/membrane/envelope biogenesis	M	CELLULAR PROCESSES AND SIGNALING
gene0835	Chr1	COG2885	Ompa motb domain protein	Cell wall/membrane/envelope biogenesis	M	CELLULAR PROCESSES AND SIGNALING
gene1351	Chr1	COG2885	Ompa motb domain protein	Cell wall/membrane/envelope biogenesis	M	CELLULAR PROCESSES AND SIGNALING
gene1417	Chr1	COG2885	Ompa motb domain protein	Cell wall/membrane/envelope biogenesis	M	CELLULAR PROCESSES AND SIGNALING
gene1552	Chr1	COG2885	Ompa motb domain protein	Cell wall/membrane/envelope biogenesis	M	CELLULAR PROCESSES AND SIGNALING
gene1633	Chr1	COG2885	Ompa motb domain protein	Cell wall/membrane/envelope biogenesis	M	CELLULAR PROCESSES AND SIGNALING
gene1981	Chr1	COG2885	Ompa motb domain protein	Cell wall/membrane/envelope biogenesis	M	CELLULAR PROCESSES AND SIGNALING
gene0746	Chr1	COG1263	PTS System	Carbohydrate transport and metabolism	G	METABOLISM
gene1054	Chr1	COG1263	PTS System	Carbohydrate transport and metabolism	G	METABOLISM
gene1089	Chr1	COG1263	PTS System	Carbohydrate transport and metabolism	G	METABOLISM
gene1422	Chr1	COG1263	PTS System	Carbohydrate transport and metabolism	G	METABOLISM
gene1750	Chr1	COG1263	PTS System	Carbohydrate transport and metabolism	G	METABOLISM
gene2066	Chr1	COG1263	PTS System	Carbohydrate transport and metabolism	G	METABOLISM
gene2228	Chr1	COG1263	PTS System	Carbohydrate transport and metabolism	G	METABOLISM
gene2303	Chr1	COG1263	PTS System	Carbohydrate transport and metabolism	G	METABOLISM
gene0750	Chr1	ENOG4111P5E	-	Function unknown	S	POORLY CHARACTERIZED
gene0751	Chr1	COG5616	Adenylate cyclase	Function unknown	S	POORLY CHARACTERIZED
gene0752	Chr1	COG3018	(LipO)protein	Function unknown	S	POORLY CHARACTERIZED
gene0753	Chr1	COG3418	Flagella synthesis protein FlgN	Cell motility	N	CELLULAR PROCESSES AND SIGNALING
gene0754	Chr1	COG2747	Negative regulator of flagellin synthesis	Transcription	K	INFORMATION STORAGE AND PROCESSING
gene0755	Chr1	COG1261	basal body p-ring	Cell motility	N	CELLULAR PROCESSES AND SIGNALING
gene0756	Chr1	COG0835	chew protein	Cell motility; Signal transduction mechanisms	N;T	CELLULAR PROCESSES AND SIGNALING;CELLULAR PROCESSES AND SIGNALING
gene1060	Chr1	COG0835	chew protein	Cell motility; Signal transduction mechanisms	N;T	CELLULAR PROCESSES AND SIGNALING;CELLULAR PROCESSES AND SIGNALING
gene2096	Chr1	COG0835	chew protein	Cell motility; Signal transduction mechanisms	N;T	CELLULAR PROCESSES AND SIGNALING;CELLULAR PROCESSES AND SIGNALING
gene0759	Chr1	COG1815	Structural component of flagellum, the bacterial motility apparatus. Part of the rod structure of flagellar basal body (By similarity)	Cell motility	N	CELLULAR PROCESSES AND SIGNALING
gene0760	Chr1	COG1558	flagellar basal-body rod protein flgc	Cell motility	N	CELLULAR PROCESSES AND SIGNALING
gene0761	Chr1	COG1843	Flagellar hook capping protein	Cell motility	N	CELLULAR PROCESSES AND SIGNALING
gene0762	Chr1	COG1749	flagellar hook protein, FlgE	Cell motility	N	CELLULAR PROCESSES AND SIGNALING
gene0763	Chr1	COG4787	Flagellar basal-body rod protein FlgF	Cell motility	N	CELLULAR PROCESSES AND SIGNALING
gene0764	Chr1	COG4786	flagellar basal-body rod protein	Cell motility	N	CELLULAR PROCESSES AND SIGNALING
gene0765	Chr1	COG2063	Assembles around the rod to form the L-ring and probably protects the motor basal body from shearing forces during rotation (By similarity)	Cell motility	N	CELLULAR PROCESSES AND SIGNALING
gene0766	Chr1	COG1706	Assembles around the rod to form the L-ring and probably protects the motor basal body from shearing forces during rotation (By similarity)	Cell motility	N	CELLULAR PROCESSES AND SIGNALING
gene0767	Chr1	COG1705	flagellar rod assembly protein muramidase flgj	Cell motility; Intracellular trafficking, secretion, and vesicular transport	N;U	CELLULAR PROCESSES AND SIGNALING;CELLULAR PROCESSES AND SIGNALING
gene0769	Chr1	COG1256	ciliary or bacterial-type flagellar motility	Cell motility	N	CELLULAR PROCESSES AND SIGNALING
gene0770	Chr1	COG1344	Flagellin	Cell motility	N	CELLULAR PROCESSES AND SIGNALING
gene0771	Chr1	COG1344	Flagellin	Cell motility	N	CELLULAR PROCESSES AND SIGNALING
gene0772	Chr1	COG1344	Flagellin	Cell motility	N	CELLULAR PROCESSES AND SIGNALING
gene2166	Chr1	COG1344	Flagellin	Cell motility	N	CELLULAR PROCESSES AND SIGNALING
gene2167	Chr1	COG1344	Flagellin	Cell motility	N	CELLULAR PROCESSES AND SIGNALING
gene2168	Chr1	COG1344	Flagellin	Cell motility	N	CELLULAR PROCESSES AND SIGNALING
gene0789	Chr1	COG0012	gtp-binding protein	Translation, ribosomal structure and biogenesis	J	INFORMATION STORAGE AND PROCESSING
gene0790	Chr1	COG0193	The natural substrate for this enzyme may be peptidyl- tRNAs which drop off the ribosome during protein synthesis (By similarity)	Translation, ribosomal structure and biogenesis	J	INFORMATION STORAGE AND PROCESSING
gene0791	Chr1	COG0462	Phosphoribosyl pyrophosphate synthase	Nucleotide transport and metabolism	F	METABOLISM
gene0792	Chr1	COG1947	Catalyzes the phosphorylation of the position 2 hydroxy group of 4-diphosphocytidyl-2C-methyl-D-erythritol (By similarity)	Lipid transport and metabolism	I	METABOLISM
gene0793	Chr1	COG3017	protein transporter activity	Cell wall/membrane/envelope biogenesis	M	CELLULAR PROCESSES AND SIGNALING
gene0794	Chr1	COG0373	Catalyzes the NADPH-dependent reduction of glutamyl- tRNA(Glu) to glutamate 1-semialdehyde (GSA) (By similarity)	Coenzyme transport and metabolism	H	METABOLISM
gene0795	Chr1	COG0216	Peptide chain release factor 1 directs the termination of translation in response to the peptide chain termination codons UAG and UAA (By similarity)	Translation, ribosomal structure and biogenesis	J	INFORMATION STORAGE AND PROCESSING
gene0796	Chr1	COG2890	Methylates the class 1 translation termination release factors RF1 PrfA and RF2 PrfB on the glutamine residue of the universally conserved GGQ motif (By similarity)	Translation, ribosomal structure and biogenesis	J	INFORMATION STORAGE AND PROCESSING
gene2141	Chr1	COG2890	Methylates the class 1 translation termination release factors RF1 PrfA and RF2 PrfB on the glutamine residue of the universally conserved GGQ motif (By similarity)	Translation, ribosomal structure and biogenesis	J	INFORMATION STORAGE AND PROCESSING
gene2142	Chr1	COG2890	Methylates the class 1 translation termination release factors RF1 PrfA and RF2 PrfB on the glutamine residue of the universally conserved GGQ motif (By similarity)	Translation, ribosomal structure and biogenesis	J	INFORMATION STORAGE AND PROCESSING
gene0797	Chr1	COG3094	Invasion gene expression up-regulator SirB	Function unknown	S	POORLY CHARACTERIZED
gene0798	Chr1	COG2912	F-box protein 21	Function unknown	S	POORLY CHARACTERIZED
gene0799	Chr1	COG2877	Phospho-2-dehydro-3-deoxyoctonate aldolase	Cell wall/membrane/envelope biogenesis	M	CELLULAR PROCESSES AND SIGNALING
gene0801	Chr1	COG2606	YbaK ebsC protein	Function unknown	S	POORLY CHARACTERIZED
gene0802	Chr1	COG2233	permease	Nucleotide transport and metabolism	F	METABOLISM
gene0803	Chr1	COG3249	Uncharacterized protein conserved in bacteria (DUF2066)	Function unknown	S	POORLY CHARACTERIZED
gene0804	Chr1	COG3308	membrAne	Function unknown	S	POORLY CHARACTERIZED
gene0805	Chr1	COG0655	Nadph-dependent fmn reductase	Function unknown	S	POORLY CHARACTERIZED
gene0806	Chr1	COG1393	arsenate reductase (glutaredoxin) activity	Inorganic ion transport and metabolism	P	METABOLISM
gene2182	Chr1	COG1393	arsenate reductase (glutaredoxin) activity	Inorganic ion transport and metabolism	P	METABOLISM
gene0807	Chr1	COG4783	peptidase m48, ste24p	Post-translational modification, protein turnover, chaperones	O	CELLULAR PROCESSES AND SIGNALING
gene0811	Chr1	COG1225	alkyl hydroperoxide reductase Thiol specific antioxidant Mal allergen	Post-translational modification, protein turnover, chaperones	O	CELLULAR PROCESSES AND SIGNALING
gene0828	Chr1	COG1225	alkyl hydroperoxide reductase Thiol specific antioxidant Mal allergen	Post-translational modification, protein turnover, chaperones	O	CELLULAR PROCESSES AND SIGNALING
gene0823	Chr1	COG1225	alkyl hydroperoxide reductase Thiol specific antioxidant Mal allergen	Post-translational modification, protein turnover, chaperones	O	CELLULAR PROCESSES AND SIGNALING
gene0813	Chr1	COG1451	metaL-dependent hydrolase	Function unknown	S	POORLY CHARACTERIZED
gene1570	Chr1	COG1451	metaL-dependent hydrolase	Function unknown	S	POORLY CHARACTERIZED
gene2275	Chr1	COG1451	metaL-dependent hydrolase	Function unknown	S	POORLY CHARACTERIZED
gene0815	Chr1	ENOG411271S	-	Function unknown	S	POORLY CHARACTERIZED
gene0818	Chr1	ENOG4111G1F	Nucleotidyl transferase of unknown function (DUF1814)	Function unknown	S	POORLY CHARACTERIZED
gene0819	Chr1	ENOG4111US5	-	Function unknown	S	POORLY CHARACTERIZED
gene0820	Chr1	COG0582	Integrase	Replication, recombination and repair	L	INFORMATION STORAGE AND PROCESSING
gene2269	Chr1	COG0582	Integrase	Replication, recombination and repair	L	INFORMATION STORAGE AND PROCESSING
gene0821	Chr1	ENOG410XPD4	Integrase catalytic subunit	Replication, recombination and repair	L	INFORMATION STORAGE AND PROCESSING
gene0825	Chr1	ENOG4111M82	Phage integrase family	Function unknown	S	POORLY CHARACTERIZED
gene0827	Chr1	ENOG410Y57P	Integrase	Replication, recombination and repair	L	INFORMATION STORAGE AND PROCESSING
gene0829	Chr1	COG2716	glycine cleavage system transcriptional repressor	Amino acid transport and metabolism	E	METABOLISM
gene1357	Chr1	COG2716	glycine cleavage system transcriptional repressor	Amino acid transport and metabolism	E	METABOLISM
gene0831	Chr1	COG0329	Catalyzes the condensation of (S)-aspartate-beta- semialdehyde (S)-ASA and pyruvate to 4-hydroxy- tetrahydrodipicolinate (HTPA) (By similarity)	Amino acid transport and metabolism	E	METABOLISM
gene0832	Chr1	COG3317	Part of the outer membrane protein assembly complex, which is involved in assembly and insertion of beta-barrel proteins into the outer membrane (By similarity)	Cell wall/membrane/envelope biogenesis	M	CELLULAR PROCESSES AND SIGNALING
gene0833	Chr1	COG2056	Na H antiporter	Function unknown	S	POORLY CHARACTERIZED
gene0836	Chr1	ENOG410YRW0	Protein of unknown function (DUF2753)	Function unknown	S	POORLY CHARACTERIZED
gene0837	Chr1	COG0346	glyoxalase bleomycin resistance protein dioxygenase	Amino acid transport and metabolism	E	METABOLISM
gene0838	Chr1	COG0177	endonuclease III	Replication, recombination and repair	L	INFORMATION STORAGE AND PROCESSING
gene0839	Chr1	COG4660	Electron transport complex	Energy production and conversion	C	METABOLISM
gene0840	Chr1	COG4659	Electron transport complex	Energy production and conversion	C	METABOLISM
gene0841	Chr1	COG4658	Electron transport complex	Energy production and conversion	C	METABOLISM
gene0842	Chr1	COG4656	Required for nitrogen fixation. May be part of a membrane complex functioning as an intermediate in the electron transport to nitrogenase (By similarity)	Energy production and conversion	C	METABOLISM
gene0843	Chr1	COG4656	Required for nitrogen fixation. May be part of a membrane complex functioning as an intermediate in the electron transport to nitrogenase (By similarity)	Energy production and conversion	C	METABOLISM
gene0844	Chr1	COG2878	Electron transport complex	Energy production and conversion	C	METABOLISM
gene0845	Chr1	COG4657	Electron transport complex	Energy production and conversion	C	METABOLISM
gene0846	Chr1	COG2704	Anaerobic C4-dicarboxylate transporter	Function unknown	S	POORLY CHARACTERIZED
gene2823	Chr1	COG2704	Anaerobic C4-dicarboxylate transporter	Function unknown	S	POORLY CHARACTERIZED
gene2833	Chr1	COG2704	Anaerobic C4-dicarboxylate transporter	Function unknown	S	POORLY CHARACTERIZED
gene0848	Chr1	COG0556	damaged site, the DNA wraps around one UvrB monomer. DNA wrap is dependent on ATP binding by UvrB and probably causes local melting of the DNA helix, facilitating insertion of UvrB beta-hairpin between the DNA strands. Then UvrB probes one DNA strand for the presence of a lesion. If a lesion is found the UvrA subunits dissociate and the UvrB-DNA preincision complex is formed. This complex is subs…	Replication, recombination and repair	L	INFORMATION STORAGE AND PROCESSING
gene0852	Chr1	COG0391	Catalyzes the transfer of the 2-phospholactate moiety from lactyl (2) diphospho-(5')guanosine (LPPG) to 7,8-didemethyl- 8-hydroxy-5-deazariboflavin (FO) with the formation of the L- lactyl phosphodiester of 7,8-didemethyl-8-hydroxy-5- deazariboflavin (F420-0) and GMP (By similarity)	Function unknown	S	POORLY CHARACTERIZED
gene0853	Chr1	COG2896	Catalyzes, together with MoaC, the conversion of 5'-GTP to cyclic pyranopterin monophosphate (cPMP or molybdopterin precursor Z) (By similarity)	Coenzyme transport and metabolism	H	METABOLISM
gene0854	Chr1	COG0521	molybdenum cofactor biosynthesis protein	Coenzyme transport and metabolism	H	METABOLISM
gene0855	Chr1	COG0315	Together with MoaA, is involved in the conversion of 5'- GTP to cyclic pyranopterin monophosphate (cPMP or molybdopterin precursor Z) (By similarity)	Coenzyme transport and metabolism	H	METABOLISM
gene0856	Chr1	COG1977	Molybdopterin converting factor (Subunit 1)	Coenzyme transport and metabolism	H	METABOLISM
gene0857	Chr1	COG0314	Molybdopterin	Coenzyme transport and metabolism	H	METABOLISM
gene0859	Chr1	COG0534	Mate efflux family protein	Defense mechanisms	V	CELLULAR PROCESSES AND SIGNALING
gene1346	Chr1	COG0534	Mate efflux family protein	Defense mechanisms	V	CELLULAR PROCESSES AND SIGNALING
gene1443	Chr1	COG0534	Mate efflux family protein	Defense mechanisms	V	CELLULAR PROCESSES AND SIGNALING
gene1816	Chr1	COG0534	Mate efflux family protein	Defense mechanisms	V	CELLULAR PROCESSES AND SIGNALING
gene2377	Chr1	COG0534	Mate efflux family protein	Defense mechanisms	V	CELLULAR PROCESSES AND SIGNALING
gene2503	Chr1	COG0534	Mate efflux family protein	Defense mechanisms	V	CELLULAR PROCESSES AND SIGNALING
gene2816	Chr1	COG0534	Mate efflux family protein	Defense mechanisms	V	CELLULAR PROCESSES AND SIGNALING
gene2891	Chr1	COG0534	Mate efflux family protein	Defense mechanisms	V	CELLULAR PROCESSES AND SIGNALING
gene0861	Chr1	COG2820	Uridine phosphorylase	Nucleotide transport and metabolism	F	METABOLISM
gene0862	Chr1	COG0143	Is required not only for elongation of protein synthesis but also for the initiation of all mRNA translation through initiator tRNA(fMet) aminoacylation (By similarity)	Translation, ribosomal structure and biogenesis	J	INFORMATION STORAGE AND PROCESSING
gene1834	Chr1	COG0073	Is required not only for elongation of protein synthesis but also for the initiation of all mRNA translation through initiator tRNA(fMet) aminoacylation (By similarity)	Translation, ribosomal structure and biogenesis	J	INFORMATION STORAGE AND PROCESSING
gene0863	Chr1	COG0489	ATP-binding protein	Cell cycle control, cell division, chromosome partitioning	D	CELLULAR PROCESSES AND SIGNALING
gene1415	Chr1	COG0489	ATP-binding protein	Cell cycle control, cell division, chromosome partitioning	D	CELLULAR PROCESSES AND SIGNALING
gene0864	Chr1	COG0572	uridine kinase	Nucleotide transport and metabolism	F	METABOLISM
gene0865	Chr1	COG2982	asmA family	Cell wall/membrane/envelope biogenesis	M	CELLULAR PROCESSES AND SIGNALING
gene0866	Chr1	ENOG4111SQE	-	Function unknown	S	POORLY CHARACTERIZED
gene1200	Chr1	ENOG4111SQE	-	Function unknown	S	POORLY CHARACTERIZED
gene0867	Chr1	COG2109	Cob-I-yrinic acid a,c-diamide adenosyltransferase	Coenzyme transport and metabolism	H	METABOLISM
gene0869	Chr1	COG0356	it plays a direct role in the translocation of protons across the membrane (By similarity)	Energy production and conversion	C	METABOLISM
gene3071	Chr1	COG0356	it plays a direct role in the translocation of protons across the membrane (By similarity)	Energy production and conversion	C	METABOLISM
gene0870	Chr1	COG0636	F(1)F(0) ATP synthase produces ATP from ADP in the presence of a proton or sodium gradient. F-type ATPases consist of two structural domains, F(1) containing the extramembraneous catalytic core and F(0) containing the membrane proton channel, linked together by a central stalk and a peripheral stalk. During catalysis, ATP synthesis in the catalytic domain of F(1) is coupled via a rotary mechanism…	Energy production and conversion	C	METABOLISM
gene3070	Chr1	COG0636	F(1)F(0) ATP synthase produces ATP from ADP in the presence of a proton or sodium gradient. F-type ATPases consist of two structural domains, F(1) containing the extramembraneous catalytic core and F(0) containing the membrane proton channel, linked together by a central stalk and a peripheral stalk. During catalysis, ATP synthesis in the catalytic domain of F(1) is coupled via a rotary mechanism…	Energy production and conversion	C	METABOLISM
gene0871	Chr1	COG0711	F(1)F(0) ATP synthase produces ATP from ADP in the presence of a proton or sodium gradient. F-type ATPases consist of two structural domains, F(1) containing the extramembraneous catalytic core and F(0) containing the membrane proton channel, linked together by a central stalk and a peripheral stalk. During catalysis, ATP synthesis in the catalytic domain of F(1) is coupled via a rotary mechanism…	Energy production and conversion	C	METABOLISM
gene3069	Chr1	COG0711	F(1)F(0) ATP synthase produces ATP from ADP in the presence of a proton or sodium gradient. F-type ATPases consist of two structural domains, F(1) containing the extramembraneous catalytic core and F(0) containing the membrane proton channel, linked together by a central stalk and a peripheral stalk. During catalysis, ATP synthesis in the catalytic domain of F(1) is coupled via a rotary mechanism…	Energy production and conversion	C	METABOLISM
gene0872	Chr1	COG0712	F(1)F(0) ATP synthase produces ATP from ADP in the presence of a proton or sodium gradient. F-type ATPases consist of two structural domains, F(1) containing the extramembraneous catalytic core and F(0) containing the membrane proton channel, linked together by a central stalk and a peripheral stalk. During catalysis, ATP synthesis in the catalytic domain of F(1) is coupled via a rotary mechanism…	Energy production and conversion	C	METABOLISM
gene3068	Chr1	COG0712	F(1)F(0) ATP synthase produces ATP from ADP in the presence of a proton or sodium gradient. F-type ATPases consist of two structural domains, F(1) containing the extramembraneous catalytic core and F(0) containing the membrane proton channel, linked together by a central stalk and a peripheral stalk. During catalysis, ATP synthesis in the catalytic domain of F(1) is coupled via a rotary mechanism…	Energy production and conversion	C	METABOLISM
gene0873	Chr1	COG0056	Produces ATP from ADP in the presence of a proton gradient across the membrane. The alpha chain is a regulatory subunit (By similarity)	Energy production and conversion	C	METABOLISM
gene3067	Chr1	COG0056	Produces ATP from ADP in the presence of a proton gradient across the membrane. The alpha chain is a regulatory subunit (By similarity)	Energy production and conversion	C	METABOLISM
gene0874	Chr1	COG0224	Produces ATP from ADP in the presence of a proton gradient across the membrane. The gamma chain is believed to be important in regulating ATPase activity and the flow of protons through the CF(0) complex (By similarity)	Energy production and conversion	C	METABOLISM
gene3066	Chr1	COG0224	Produces ATP from ADP in the presence of a proton gradient across the membrane. The gamma chain is believed to be important in regulating ATPase activity and the flow of protons through the CF(0) complex (By similarity)	Energy production and conversion	C	METABOLISM
gene0875	Chr1	COG0055	Produces ATP from ADP in the presence of a proton gradient across the membrane. The catalytic sites are hosted primarily by the beta subunits (By similarity)	Energy production and conversion	C	METABOLISM
gene3065	Chr1	COG0055	Produces ATP from ADP in the presence of a proton gradient across the membrane. The catalytic sites are hosted primarily by the beta subunits (By similarity)	Energy production and conversion	C	METABOLISM
gene0876	Chr1	COG0355	Produces ATP from ADP in the presence of a proton gradient across the membrane (By similarity)	Energy production and conversion	C	METABOLISM
gene3064	Chr1	COG0355	Produces ATP from ADP in the presence of a proton gradient across the membrane (By similarity)	Energy production and conversion	C	METABOLISM
gene0877	Chr1	COG0394	PHOsphatase	Signal transduction mechanisms	T	CELLULAR PROCESSES AND SIGNALING
gene0879	Chr1	ENOG410Y032	Ribosomal S4P (gammaproteobacterial)	Function unknown	S	POORLY CHARACTERIZED
gene0880	Chr1	COG0605	Destroys radicals which are normally produced within the cells and which are toxic to biological systems (By similarity)	Inorganic ion transport and metabolism	P	METABOLISM
gene2829	Chr1	COG0605	Destroys radicals which are normally produced within the cells and which are toxic to biological systems (By similarity)	Inorganic ion transport and metabolism	P	METABOLISM
gene0881	Chr1	COG0278	Glutaredoxin	Post-translational modification, protein turnover, chaperones	O	CELLULAR PROCESSES AND SIGNALING
gene0882	Chr1	COG0550	Releases the supercoiling and torsional tension of DNA, which is introduced during the DNA replication and transcription, by transiently cleaving and rejoining one strand of the DNA duplex. Introduces a single-strand break via transesterification at a target site in duplex DNA. The scissile phosphodiester is attacked by the catalytic tyrosine of the enzyme, resulting in the formation of a DNA-(5'…	Replication, recombination and repair	L	INFORMATION STORAGE AND PROCESSING
gene0883	Chr1	ENOG410Y3B2	-	Function unknown	S	POORLY CHARACTERIZED
gene0885	Chr1	COG0123	Histone deacetylase	Chromatin structure and dynamics; Secondary metabolites biosynthesis, transport and catabolism	B;Q	INFORMATION STORAGE AND PROCESSING;METABOLISM
gene1121	Chr1	COG0123	Histone deacetylase	Chromatin structure and dynamics; Secondary metabolites biosynthesis, transport and catabolism	B;Q	INFORMATION STORAGE AND PROCESSING;METABOLISM
gene0887	Chr1	ENOG4111R11	Acyltransferase family	Function unknown	S	POORLY CHARACTERIZED
gene0888	Chr1	COG1757	Na H antiporter	Energy production and conversion	C	METABOLISM
gene0913	Chr1	COG1757	Na H antiporter	Energy production and conversion	C	METABOLISM
gene1906	Chr1	COG1757	Na H antiporter	Energy production and conversion	C	METABOLISM
gene2309	Chr1	COG1757	Na H antiporter	Energy production and conversion	C	METABOLISM
gene0890	Chr1	COG2992	BAX protein	Function unknown	S	POORLY CHARACTERIZED
gene1487	Chr1	COG2992	BAX protein	Function unknown	S	POORLY CHARACTERIZED
gene0892	Chr1	COG2188	GntR family transcriptional regulator	Transcription	K	INFORMATION STORAGE AND PROCESSING
gene1607	Chr1	COG2188	GntR family transcriptional regulator	Transcription	K	INFORMATION STORAGE AND PROCESSING
gene1810	Chr1	COG2188	GntR family transcriptional regulator	Transcription	K	INFORMATION STORAGE AND PROCESSING
gene2067	Chr1	COG2188	GntR family transcriptional regulator	Transcription	K	INFORMATION STORAGE AND PROCESSING
gene0893	Chr1	COG3958	Transketolase	Carbohydrate transport and metabolism	G	METABOLISM
gene0894	Chr1	COG3959	Transketolase	Carbohydrate transport and metabolism	G	METABOLISM
gene0895	Chr1	COG3037	PTS system ascorbate-specific transporter subunit IIC	Carbohydrate transport and metabolism	G	METABOLISM
gene0896	Chr1	COG3414	PTS System	Carbohydrate transport and metabolism	G	METABOLISM
gene0898	Chr1	COG3700	class B acid phosphatase	Function unknown	S	POORLY CHARACTERIZED
gene0899	Chr1	COG0446	pyridine nucleotide-disulfide oxidoreductase	Function unknown	S	POORLY CHARACTERIZED
gene1023	Chr1	COG0446	pyridine nucleotide-disulfide oxidoreductase	Function unknown	S	POORLY CHARACTERIZED
gene0900	Chr1	COG1823	sodium dicarboxylate symporter	Function unknown	S	POORLY CHARACTERIZED
gene0902	Chr1	COG2964	YheO domain protein	Function unknown	S	POORLY CHARACTERIZED
gene2759	Chr1	COG2964	YheO domain protein	Function unknown	S	POORLY CHARACTERIZED
gene2974	Chr1	COG2964	YheO domain protein	Function unknown	S	POORLY CHARACTERIZED
gene0903	Chr1	COG1288	c4-dicarboxylate anaerobic carrier	Function unknown	S	POORLY CHARACTERIZED
gene0904	Chr1	ENOG410XS3N	NAD NADP octopine nopaline dehydrogenase	Energy production and conversion	C	METABOLISM
gene0905	Chr1	ENOG410XT7K	LysR family transcriptional Regulator	Transcription	K	INFORMATION STORAGE AND PROCESSING
gene0908	Chr1	COG3083	Sulfatase	Function unknown	S	POORLY CHARACTERIZED
gene0909	Chr1	COG3082	UPF0352 protein	Function unknown	S	POORLY CHARACTERIZED
gene0910	Chr1	COG3081	Nucleoid-associated protein	Function unknown	S	POORLY CHARACTERIZED
gene0911	Chr1	COG2198	Histidine kinase	Signal transduction mechanisms	T	CELLULAR PROCESSES AND SIGNALING
gene2537	Chr1	COG2198	Histidine kinase	Signal transduction mechanisms	T	CELLULAR PROCESSES AND SIGNALING
gene0912	Chr1	ENOG4111SBG	methyl-accepting chemotaxis protein	Function unknown	S	POORLY CHARACTERIZED
gene0914	Chr1	COG0136	Catalyzes the NADPH-dependent formation of L-aspartate- semialdehyde (L-ASA) by the reductive dephosphorylation of L- aspartyl-4-phosphate (By similarity)	Amino acid transport and metabolism	E	METABOLISM
gene2128	Chr1	COG0136	Catalyzes the NADPH-dependent formation of L-aspartate- semialdehyde (L-ASA) by the reductive dephosphorylation of L- aspartyl-4-phosphate (By similarity)	Amino acid transport and metabolism	E	METABOLISM
gene0915	Chr1	COG1802	GntR Family Transcriptional Regulator	Transcription	K	INFORMATION STORAGE AND PROCESSING
gene0916	Chr1	ENOG4111YIB	methylation site containing protein	Function unknown	S	POORLY CHARACTERIZED
gene0918	Chr1	COG2095	multiple antibiotic resistance (MarC)-related protein	Intracellular trafficking, secretion, and vesicular transport	U	CELLULAR PROCESSES AND SIGNALING
gene2836	Chr1	COG2095	multiple antibiotic resistance (MarC)-related protein	Intracellular trafficking, secretion, and vesicular transport	U	CELLULAR PROCESSES AND SIGNALING
gene2908	Chr1	COG2095	multiple antibiotic resistance (MarC)-related protein	Intracellular trafficking, secretion, and vesicular transport	U	CELLULAR PROCESSES AND SIGNALING
gene1654	Chr1	COG1454	alcohol dehydrogenase	Energy production and conversion	C	METABOLISM
gene2667	Chr1	COG1454	alcohol dehydrogenase	Energy production and conversion	C	METABOLISM
gene0920	Chr1	COG0851	Prevents the cell division inhibition by proteins MinC and MinD at internal division sites while permitting inhibition at polar sites. This ensures cell division at the proper site by restricting the formation of a division septum at the midpoint of the long axis of the cell (By similarity)	Cell cycle control, cell division, chromosome partitioning	D	CELLULAR PROCESSES AND SIGNALING
gene0921	Chr1	COG2894	site-determining protein	Cell cycle control, cell division, chromosome partitioning	D	CELLULAR PROCESSES AND SIGNALING
gene0922	Chr1	COG0850	Cell division inhibitor that blocks the formation of polar Z ring septums. Rapidly oscillates between the poles of the cell to destabilize FtsZ filaments that have formed before they mature into polar Z rings. Prevents FtsZ polymerization (By similarity)	Cell cycle control, cell division, chromosome partitioning	D	CELLULAR PROCESSES AND SIGNALING
gene0923	Chr1	COG3100	YcgL domain	Function unknown	S	POORLY CHARACTERIZED
gene0924	Chr1	COG2951	Lytic murein transglycosylase	Cell wall/membrane/envelope biogenesis	M	CELLULAR PROCESSES AND SIGNALING
gene0925	Chr1	ENOG410XRV0	LysR family (Transcriptional regulator	Transcription	K	INFORMATION STORAGE AND PROCESSING
gene0926	Chr1	COG1972	)-nucleoside	Nucleotide transport and metabolism	F	METABOLISM
gene2407	Chr1	COG1972	)-nucleoside	Nucleotide transport and metabolism	F	METABOLISM
gene0928	Chr1	COG0190	Catalyzes the oxidation of 5,10- methylenetetrahydrofolate to 5,10-methenyltetrahydrofolate and then the hydrolysis of 5,10-methenyltetrahydrofolate to 10- formyltetrahydrofolate (By similarity)	Coenzyme transport and metabolism	H	METABOLISM
gene0929	Chr1	ENOG4111XV6	Phage integrase family	Replication, recombination and repair	L	INFORMATION STORAGE AND PROCESSING
gene0930	Chr1	ENOG410YHFD	-	Function unknown	S	POORLY CHARACTERIZED
gene0935	Chr1	ENOG410ZBY4	-	Function unknown	S	POORLY CHARACTERIZED
gene0936	Chr1	COG2206	Metal Dependent Phosphohydrolase	Signal transduction mechanisms	T	CELLULAR PROCESSES AND SIGNALING
gene1560	Chr1	COG2206	Metal Dependent Phosphohydrolase	Signal transduction mechanisms	T	CELLULAR PROCESSES AND SIGNALING
gene1561	Chr1	COG2206	Metal Dependent Phosphohydrolase	Signal transduction mechanisms	T	CELLULAR PROCESSES AND SIGNALING
gene1596	Chr1	COG2206	Metal Dependent Phosphohydrolase	Signal transduction mechanisms	T	CELLULAR PROCESSES AND SIGNALING
gene2581	Chr1	COG2206	Metal Dependent Phosphohydrolase	Signal transduction mechanisms	T	CELLULAR PROCESSES AND SIGNALING
gene0937	Chr1	ENOG4111FDW	-	Function unknown	S	POORLY CHARACTERIZED
gene0939	Chr1	COG1168	Aminotransferase	Amino acid transport and metabolism	E	METABOLISM
gene0941	Chr1	COG1447	IIa component	Carbohydrate transport and metabolism	G	METABOLISM
gene1319	Chr1	COG1447	IIa component	Carbohydrate transport and metabolism	G	METABOLISM
gene2586	Chr1	COG1447	IIa component	Carbohydrate transport and metabolism	G	METABOLISM
gene2658	Chr1	COG1447	IIa component	Carbohydrate transport and metabolism	G	METABOLISM
gene0943	Chr1	COG1440	protein-N(PI)-phosphohistidine-sugar phosphotransferase activity	Carbohydrate transport and metabolism	G	METABOLISM
gene1321	Chr1	COG1440	protein-N(PI)-phosphohistidine-sugar phosphotransferase activity	Carbohydrate transport and metabolism	G	METABOLISM
gene2588	Chr1	COG1440	protein-N(PI)-phosphohistidine-sugar phosphotransferase activity	Carbohydrate transport and metabolism	G	METABOLISM
gene2659	Chr1	COG1440	protein-N(PI)-phosphohistidine-sugar phosphotransferase activity	Carbohydrate transport and metabolism	G	METABOLISM
gene0944	Chr1	COG1455	pts system	Carbohydrate transport and metabolism	G	METABOLISM
gene1320	Chr1	COG1455	pts system	Carbohydrate transport and metabolism	G	METABOLISM
gene1854	Chr1	COG1455	pts system	Carbohydrate transport and metabolism	G	METABOLISM
gene2587	Chr1	COG1455	pts system	Carbohydrate transport and metabolism	G	METABOLISM
gene2661	Chr1	COG1455	pts system	Carbohydrate transport and metabolism	G	METABOLISM
gene0945	Chr1	COG0006	peptidase M24	Amino acid transport and metabolism	E	METABOLISM
gene1265	Chr1	COG0006	peptidase M24	Amino acid transport and metabolism	E	METABOLISM
gene3034	Chr1	COG0006	peptidase M24	Amino acid transport and metabolism	E	METABOLISM
gene0946	Chr1	COG1363	Peptidase m42 family protein	Amino acid transport and metabolism	E	METABOLISM
gene0948	Chr1	ENOG41127IU	Transcriptional regulator	Transcription	K	INFORMATION STORAGE AND PROCESSING
gene0950	Chr1	ENOG41127IU	Transcriptional regulator	Transcription	K	INFORMATION STORAGE AND PROCESSING
gene0949	Chr1	COG3335	transposase	Replication, recombination and repair	L	INFORMATION STORAGE AND PROCESSING
gene1134	Chr1	COG3335	transposase	Replication, recombination and repair	L	INFORMATION STORAGE AND PROCESSING
gene2368	Chr1	COG3335	transposase	Replication, recombination and repair	L	INFORMATION STORAGE AND PROCESSING
gene2841	Chr1	COG3335	transposase	Replication, recombination and repair	L	INFORMATION STORAGE AND PROCESSING
gene2866	Chr1	COG3335	transposase	Replication, recombination and repair	L	INFORMATION STORAGE AND PROCESSING
gene0951	Chr1	COG3444	pts system	Carbohydrate transport and metabolism	G	METABOLISM
gene1071	Chr1	COG3444	pts system	Carbohydrate transport and metabolism	G	METABOLISM
gene0952	Chr1	COG3715	PTS System	Carbohydrate transport and metabolism	G	METABOLISM
gene1070	Chr1	COG3715	PTS System	Carbohydrate transport and metabolism	G	METABOLISM
gene0953	Chr1	COG3716	PTS system mannose fructose sorbose family iid component	Carbohydrate transport and metabolism	G	METABOLISM
gene1069	Chr1	COG3716	PTS system mannose fructose sorbose family iid component	Carbohydrate transport and metabolism	G	METABOLISM
gene0954	Chr1	COG2893	pts system	Carbohydrate transport and metabolism	G	METABOLISM
gene1068	Chr1	COG2893	pts system	Carbohydrate transport and metabolism	G	METABOLISM
gene0955	Chr1	COG4225	Glycosyl Hydrolase Family 88	Function unknown	S	POORLY CHARACTERIZED
gene0956	Chr1	COG0698	Isomerase	Carbohydrate transport and metabolism	G	METABOLISM
gene0957	Chr1	COG4289	conserved protein	Function unknown	S	POORLY CHARACTERIZED
gene0958	Chr1	COG1414	Iclr family transcriptional regulator	Transcription	K	INFORMATION STORAGE AND PROCESSING
gene0964	Chr1	COG1414	Iclr family transcriptional regulator	Transcription	K	INFORMATION STORAGE AND PROCESSING
gene0959	Chr1	ENOG410XNW1	)-reductase	Function unknown	S	POORLY CHARACTERIZED
gene1046	Chr1	ENOG410XNW1	)-reductase	Function unknown	S	POORLY CHARACTERIZED
gene1728	Chr1	ENOG410XNW1	)-reductase	Function unknown	S	POORLY CHARACTERIZED
gene0961	Chr1	COG0524	pfkb domain protein	Carbohydrate transport and metabolism	G	METABOLISM
gene1908	Chr1	COG0524	pfkb domain protein	Carbohydrate transport and metabolism	G	METABOLISM
gene1910	Chr1	COG0524	pfkb domain protein	Carbohydrate transport and metabolism	G	METABOLISM
gene0962	Chr1	COG0800	Aldolase	Carbohydrate transport and metabolism	G	METABOLISM
gene3018	Chr1	COG0800	Aldolase	Carbohydrate transport and metabolism	G	METABOLISM
gene0963	Chr1	COG2731	YhcH YjgK YiaL family protein	Carbohydrate transport and metabolism	G	METABOLISM
gene0965	Chr1	COG1593	trap dicarboxylate transporter dctm subunit	Carbohydrate transport and metabolism	G	METABOLISM
gene0978	Chr1	COG1593	trap dicarboxylate transporter dctm subunit	Carbohydrate transport and metabolism	G	METABOLISM
gene0966	Chr1	COG3090	Tripartite ATP-independent periplasmic transporter dctq component	Carbohydrate transport and metabolism	G	METABOLISM
gene0968	Chr1	COG3090	Tripartite ATP-independent periplasmic transporter dctq component	Carbohydrate transport and metabolism	G	METABOLISM
gene0977	Chr1	COG3090	Tripartite ATP-independent periplasmic transporter dctq component	Carbohydrate transport and metabolism	G	METABOLISM
gene0969	Chr1	COG1638	Trap dicarboxylate transporter, dctp subunit	Carbohydrate transport and metabolism	G	METABOLISM
gene0976	Chr1	COG1638	Trap dicarboxylate transporter, dctp subunit	Carbohydrate transport and metabolism	G	METABOLISM
gene0970	Chr1	COG3717	Catalyzes the isomerization of 5-dehydro-4-deoxy-D- glucuronate to 3-deoxy-D-glycero-2,5-hexodiulosonate (By similarity)	Carbohydrate transport and metabolism	G	METABOLISM
gene0972	Chr1	COG0625	glutathione Stransferase	Post-translational modification, protein turnover, chaperones	O	CELLULAR PROCESSES AND SIGNALING
gene1636	Chr1	COG0625	glutathione Stransferase	Post-translational modification, protein turnover, chaperones	O	CELLULAR PROCESSES AND SIGNALING
gene2448	Chr1	COG0625	glutathione Stransferase	Post-translational modification, protein turnover, chaperones	O	CELLULAR PROCESSES AND SIGNALING
gene0975	Chr1	COG0397	UPF0061 protein	Function unknown	S	POORLY CHARACTERIZED
gene0980	Chr1	COG4559	Part of the ABC transporter complex HmuTUV involved in hemin import. Responsible for energy coupling to the transport system (By similarity)	Inorganic ion transport and metabolism	P	METABOLISM
gene0981	Chr1	COG0609	permease protein	Inorganic ion transport and metabolism	P	METABOLISM
gene2693	Chr1	COG0609	permease protein	Inorganic ion transport and metabolism	P	METABOLISM
gene0982	Chr1	COG4558	periplasmic binding protein	Inorganic ion transport and metabolism	P	METABOLISM
gene0983	Chr1	COG0848	Biopolymer transport protein exbD tolR	Intracellular trafficking, secretion, and vesicular transport	U	CELLULAR PROCESSES AND SIGNALING
gene1384	Chr1	COG0848	Biopolymer transport protein exbD tolR	Intracellular trafficking, secretion, and vesicular transport	U	CELLULAR PROCESSES AND SIGNALING
gene1984	Chr1	COG0848	Biopolymer transport protein exbD tolR	Intracellular trafficking, secretion, and vesicular transport	U	CELLULAR PROCESSES AND SIGNALING
gene0984	Chr1	COG0811	MotA TolQ exbB proton channel	Intracellular trafficking, secretion, and vesicular transport	U	CELLULAR PROCESSES AND SIGNALING
gene1382	Chr1	COG0811	MotA TolQ exbB proton channel	Intracellular trafficking, secretion, and vesicular transport	U	CELLULAR PROCESSES AND SIGNALING
gene1383	Chr1	COG0811	MotA TolQ exbB proton channel	Intracellular trafficking, secretion, and vesicular transport	U	CELLULAR PROCESSES AND SIGNALING
gene1985	Chr1	COG0811	MotA TolQ exbB proton channel	Intracellular trafficking, secretion, and vesicular transport	U	CELLULAR PROCESSES AND SIGNALING
gene0985	Chr1	COG0810	TonB family	Cell wall/membrane/envelope biogenesis	M	CELLULAR PROCESSES AND SIGNALING
gene1385	Chr1	COG0810	TonB family	Cell wall/membrane/envelope biogenesis	M	CELLULAR PROCESSES AND SIGNALING
gene0987	Chr1	COG3721	Pfam:DUF1008	Inorganic ion transport and metabolism	P	METABOLISM
gene0988	Chr1	COG0748	pyridoxamine 5-phosphate	Inorganic ion transport and metabolism	P	METABOLISM
gene0989	Chr1	COG1629	receptor	Inorganic ion transport and metabolism	P	METABOLISM
gene1380	Chr1	COG1629	receptor	Inorganic ion transport and metabolism	P	METABOLISM
gene2886	Chr1	COG1629	receptor	Inorganic ion transport and metabolism	P	METABOLISM
gene0991	Chr1	COG4191	Histidine kinase	Signal transduction mechanisms	T	CELLULAR PROCESSES AND SIGNALING
gene0992	Chr1	COG0544	Involved in protein export. Acts as a chaperone by maintaining the newly synthesized protein in an open conformation	Post-translational modification, protein turnover, chaperones	O	CELLULAR PROCESSES AND SIGNALING
gene0993	Chr1	COG0740	Cleaves peptides in various proteins in a process that requires ATP hydrolysis. Has a chymotrypsin-like activity. Plays a major role in the degradation of misfolded proteins (By similarity)	Post-translational modification, protein turnover, chaperones	O	CELLULAR PROCESSES AND SIGNALING
gene0994	Chr1	COG1219	ATP-dependent specificity component of the Clp protease. It directs the protease to specific substrates. Can perform chaperone functions in the absence of ClpP (By similarity)	Post-translational modification, protein turnover, chaperones	O	CELLULAR PROCESSES AND SIGNALING
gene0995	Chr1	COG0466	ATP-dependent serine protease that mediates the selective degradation of mutant and abnormal proteins as well as certain short-lived regulatory proteins. Required for cellular homeostasis and for survival from DNA damage and developmental changes induced by stress. Degrades polypeptides processively to yield small peptide fragments that are 5 to 10 amino acids long. Binds to DNA in a double-stran…	Post-translational modification, protein turnover, chaperones	O	CELLULAR PROCESSES AND SIGNALING
gene0996	Chr1	COG0776	This protein is one of the two subunits of integration host factor, a specific DNA-binding protein that functions in genetic recombination as well as in transcriptional and translational control (By similarity)	Replication, recombination and repair	L	INFORMATION STORAGE AND PROCESSING
gene1002	Chr1	COG0776	This protein is one of the two subunits of integration host factor, a specific DNA-binding protein that functions in genetic recombination as well as in transcriptional and translational control (By similarity)	Replication, recombination and repair	L	INFORMATION STORAGE AND PROCESSING
gene1858	Chr1	COG0776	This protein is one of the two subunits of integration host factor, a specific DNA-binding protein that functions in genetic recombination as well as in transcriptional and translational control (By similarity)	Replication, recombination and repair	L	INFORMATION STORAGE AND PROCESSING
gene2860	Chr1	COG0776	This protein is one of the two subunits of integration host factor, a specific DNA-binding protein that functions in genetic recombination as well as in transcriptional and translational control (By similarity)	Replication, recombination and repair	L	INFORMATION STORAGE AND PROCESSING
gene0998	Chr1	COG1555	Competence protein	Replication, recombination and repair	L	INFORMATION STORAGE AND PROCESSING
gene1000	Chr1	COG0283	Cytidine monophosphate kinase	Nucleotide transport and metabolism	F	METABOLISM
gene1001	Chr1	COG0539	thus facilitating recognition of the initiation point. It is needed to translate mRNA with a short Shine-Dalgarno (SD) purine-rich sequence (By similarity)	Translation, ribosomal structure and biogenesis	J	INFORMATION STORAGE AND PROCESSING
gene1003	Chr1	COG3771	Membrane	Function unknown	S	POORLY CHARACTERIZED
gene1004	Chr1	COG2956	tetratricopeptide repeat protein	Carbohydrate transport and metabolism	G	METABOLISM
gene1005	Chr1	COG0284	Catalyzes the decarboxylation of orotidine 5'- monophosphate (OMP) to uridine 5'-monophosphate (UMP) (By similarity)	Nucleotide transport and metabolism	F	METABOLISM
gene1007	Chr1	ENOG410XP61	Transcriptional regulator	Transcription	K	INFORMATION STORAGE AND PROCESSING
gene1008	Chr1	ENOG410XPMJ	-	Function unknown	S	POORLY CHARACTERIZED
gene1009	Chr1	COG2984	(ABC) transporter	Function unknown	S	POORLY CHARACTERIZED
gene1010	Chr1	COG4120	ABC transporter (permease)	Function unknown	S	POORLY CHARACTERIZED
gene1011	Chr1	COG1101	ABC transporter, (ATP-binding protein)	Function unknown	S	POORLY CHARACTERIZED
gene1014	Chr1	COG3318	Yeca family	Function unknown	S	POORLY CHARACTERIZED
gene1977	Chr1	COG3318	Yeca family	Function unknown	S	POORLY CHARACTERIZED
gene1015	Chr1	COG2834	Participates in the translocation of lipoproteins from the inner membrane to the outer membrane. Only forms a complex with a lipoprotein if the residue after the N-terminal Cys is not an aspartate (The Asp acts as a targeting signal to indicate that the lipoprotein should stay in the inner membrane) (By similarity)	Cell wall/membrane/envelope biogenesis	M	CELLULAR PROCESSES AND SIGNALING
gene1016	Chr1	COG2256	Recombination factor protein RarA	Replication, recombination and repair	L	INFORMATION STORAGE AND PROCESSING
gene1017	Chr1	COG0172	Catalyzes the attachment of serine to tRNA(Ser). Is also able to aminoacylate tRNA(Sec) with serine, to form the misacylated tRNA L-seryl-tRNA(Sec), which will be further converted into selenocysteinyl-tRNA(Sec) (By similarity)	Translation, ribosomal structure and biogenesis	J	INFORMATION STORAGE AND PROCESSING
gene1020	Chr1	COG1266	caax amino terminal protease family protein	Function unknown	S	POORLY CHARACTERIZED
gene1021	Chr1	COG0252	L-asparaginase	Amino acid transport and metabolism	E	METABOLISM
gene1022	Chr1	COG0616	Signal peptide peptidase, SppA	Post-translational modification, protein turnover, chaperones; Intracellular trafficking, secretion, and vesicular transport	O;U	CELLULAR PROCESSES AND SIGNALING;CELLULAR PROCESSES AND SIGNALING
gene1065	Chr1	COG0616	Signal peptide peptidase, SppA	Post-translational modification, protein turnover, chaperones; Intracellular trafficking, secretion, and vesicular transport	O;U	CELLULAR PROCESSES AND SIGNALING;CELLULAR PROCESSES AND SIGNALING
gene3257	Chr2	COG0616	Signal peptide peptidase, SppA	Post-translational modification, protein turnover, chaperones; Intracellular trafficking, secretion, and vesicular transport	O;U	CELLULAR PROCESSES AND SIGNALING;CELLULAR PROCESSES AND SIGNALING
gene1025	Chr1	COG0788	formyltetrahydrofolate deformylase	Nucleotide transport and metabolism	F	METABOLISM
gene1027	Chr1	COG1199	helicase	Replication, recombination and repair	L	INFORMATION STORAGE AND PROCESSING
gene1934	Chr1	COG1199	helicase	Replication, recombination and repair	L	INFORMATION STORAGE AND PROCESSING
gene1028	Chr1	COG1214	Peptidase M22 Glycoprotease	Post-translational modification, protein turnover, chaperones	O	CELLULAR PROCESSES AND SIGNALING
gene1030	Chr1	COG3065	outer membrane lipoprotein	Cell wall/membrane/envelope biogenesis	M	CELLULAR PROCESSES AND SIGNALING
gene1033	Chr1	COG0349	Exonuclease involved in the 3' processing of various precursor tRNAs. Initiates hydrolysis at the 3'-terminus of an RNA molecule and releases 5'-mononucleotides (By similarity)	Translation, ribosomal structure and biogenesis	J	INFORMATION STORAGE AND PROCESSING
gene1041	Chr1	COG1399	nucleic acidbinding protein	Function unknown	S	POORLY CHARACTERIZED
gene1042	Chr1	COG0333	50s ribosomal protein l32	Translation, ribosomal structure and biogenesis	J	INFORMATION STORAGE AND PROCESSING
gene1043	Chr1	COG0416	Catalyzes the reversible formation of acyl-phosphate (acyl-PO(4)) from acyl- acyl-carrier-protein (acyl-ACP). This enzyme utilizes acyl-ACP as fatty acyl donor, but not acyl-CoA (By similarity)	Lipid transport and metabolism	I	METABOLISM
gene1045	Chr1	COG0331	Malonyl coA-acyl carrier protein transacylase	Lipid transport and metabolism	I	METABOLISM
gene1047	Chr1	COG0236	Carrier of the growing fatty acid chain in fatty acid biosynthesis (By similarity)	Lipid transport and metabolism	I	METABOLISM
gene1048	Chr1	COG0304	Catalyzes the condensation reaction of fatty acid synthesis by the addition to an acyl acceptor of two carbons from malonyl-ACP (By similarity)	Lipid transport and metabolism	I	METABOLISM
gene2130	Chr1	COG0304	Catalyzes the condensation reaction of fatty acid synthesis by the addition to an acyl acceptor of two carbons from malonyl-ACP (By similarity)	Lipid transport and metabolism	I	METABOLISM
gene1050	Chr1	COG1559	Aminodeoxychorismate lyase	Function unknown	S	POORLY CHARACTERIZED
gene1051	Chr1	COG0125	Phosphorylation of dTMP to form dTDP in both de novo and salvage pathways of dTTP synthesis (By similarity)	Nucleotide transport and metabolism	F	METABOLISM
gene1052	Chr1	COG0470	DNA polymerase III subunit delta'	Replication, recombination and repair	L	INFORMATION STORAGE AND PROCESSING
gene1053	Chr1	COG0084	tatd family	Replication, recombination and repair	L	INFORMATION STORAGE AND PROCESSING
gene2408	Chr1	COG0084	tatd family	Replication, recombination and repair	L	INFORMATION STORAGE AND PROCESSING
gene3009	Chr1	COG0084	tatd family	Replication, recombination and repair	L	INFORMATION STORAGE AND PROCESSING
gene1055	Chr1	ENOG41124YX	-	Function unknown	S	POORLY CHARACTERIZED
gene1058	Chr1	COG4667	Phospholipase, patatin family	Function unknown	S	POORLY CHARACTERIZED
gene1059	Chr1	COG1940	ROK family	Carbohydrate transport and metabolism	G	METABOLISM
gene1452	Chr1	COG1940	ROK family	Carbohydrate transport and metabolism	G	METABOLISM
gene2230	Chr1	COG1940	ROK family	Carbohydrate transport and metabolism	G	METABOLISM
gene1063	Chr1	ENOG4111XDY	cell division inhibitor SULA	Function unknown	S	POORLY CHARACTERIZED
gene1066	Chr1	COG0191	Aldolase	Carbohydrate transport and metabolism	G	METABOLISM
gene2706	Chr1	COG0191	Aldolase	Carbohydrate transport and metabolism	G	METABOLISM
gene1067	Chr1	COG1820	GlcNAc 6-P deacetylase	Carbohydrate transport and metabolism	G	METABOLISM
gene2229	Chr1	COG1820	GlcNAc 6-P deacetylase	Carbohydrate transport and metabolism	G	METABOLISM
gene1072	Chr1	COG2222	carbohydrate binding	Cell wall/membrane/envelope biogenesis	M	CELLULAR PROCESSES AND SIGNALING
gene1073	Chr1	COG4573	that is required for full activity and stability of the Y subunit. Could have a chaperone-like function for the proper and stable folding of	Carbohydrate transport and metabolism	G	METABOLISM
gene1074	Chr1	COG1349	transcriptional regulator DeoR family	Transcription	K	INFORMATION STORAGE AND PROCESSING
gene1077	Chr1	COG1349	transcriptional regulator DeoR family	Transcription	K	INFORMATION STORAGE AND PROCESSING
gene2699	Chr1	COG1349	transcriptional regulator DeoR family	Transcription	K	INFORMATION STORAGE AND PROCESSING
gene1075	Chr1	COG1278	Cold shock protein	Transcription	K	INFORMATION STORAGE AND PROCESSING
gene2008	Chr1	COG1278	Cold shock protein	Transcription	K	INFORMATION STORAGE AND PROCESSING
gene1078	Chr1	COG0705	rhomboid family	Function unknown	S	POORLY CHARACTERIZED
gene2900	Chr1	COG0705	rhomboid family	Function unknown	S	POORLY CHARACTERIZED
gene1079	Chr1	COG3148	Dtw domain containing protein	Function unknown	S	POORLY CHARACTERIZED
gene1451	Chr1	COG3148	Dtw domain containing protein	Function unknown	S	POORLY CHARACTERIZED
gene2925	Chr1	COG3148	Dtw domain containing protein	Function unknown	S	POORLY CHARACTERIZED
gene1080	Chr1	COG0232	deoxyguanosinetriphosphate triphosphohydrolase-like protein	Nucleotide transport and metabolism	F	METABOLISM
gene1081	Chr1	COG1896	Metal Dependent Phosphohydrolase	Function unknown	S	POORLY CHARACTERIZED
gene1299	Chr1	COG1896	Metal Dependent Phosphohydrolase	Function unknown	S	POORLY CHARACTERIZED
gene1082	Chr1	COG0436	aminotransferase	Amino acid transport and metabolism	E	METABOLISM
gene1083	Chr1	COG1169	isochorismate synthase	Coenzyme transport and metabolism	H	METABOLISM
gene1084	Chr1	COG1165	Catalyzes the thiamine diphosphate-dependent decarboxylation of 2-oxoglutarate and the subsequent addition of the resulting succinic semialdehyde-thiamine pyrophosphate anion to isochorismate to yield 2-succinyl-5-enolpyruvyl-6-hydroxy-3- cyclohexene-1-carboxylate (SEPHCHC) (By similarity)	Coenzyme transport and metabolism	H	METABOLISM
gene1086	Chr1	COG0447	Naphthoate synthase	Coenzyme transport and metabolism	H	METABOLISM
gene1087	Chr1	COG1441	Converts SHCHC to OSB (By similarity)	Coenzyme transport and metabolism	H	METABOLISM
gene1092	Chr1	COG2855	Membrane	Function unknown	S	POORLY CHARACTERIZED
gene1093	Chr1	ENOG410XQW5	Lysophospholipid transporter LplT	Carbohydrate transport and metabolism	G	METABOLISM
gene1094	Chr1	ENOG4111XM1	Transcriptional regulator	Transcription	K	INFORMATION STORAGE AND PROCESSING
gene1095	Chr1	COG4395	Import inner membrane translocase subunit TIM44	Function unknown	S	POORLY CHARACTERIZED
gene1096	Chr1	COG3492	Deoxycytidine triphosphate deaminase	Function unknown	S	POORLY CHARACTERIZED
gene1098	Chr1	COG1522	transcriptional regulator AsnC family	Transcription	K	INFORMATION STORAGE AND PROCESSING
gene1145	Chr1	COG1522	transcriptional regulator AsnC family	Transcription	K	INFORMATION STORAGE AND PROCESSING
gene1264	Chr1	COG1522	transcriptional regulator AsnC family	Transcription	K	INFORMATION STORAGE AND PROCESSING
gene3030	Chr1	COG1522	transcriptional regulator AsnC family	Transcription	K	INFORMATION STORAGE AND PROCESSING
gene1099	Chr1	COG1946	acyl-CoA thioesterase	Lipid transport and metabolism	I	METABOLISM
gene1100	Chr1	COG3126	(LipO)protein	Function unknown	S	POORLY CHARACTERIZED
gene1101	Chr1	COG3695	Methyltransferase	Replication, recombination and repair	L	INFORMATION STORAGE AND PROCESSING
gene1103	Chr1	COG0834	(ABC) transporter	Amino acid transport and metabolism	E	METABOLISM
gene1188	Chr1	COG0834	(ABC) transporter	Amino acid transport and metabolism	E	METABOLISM
gene1540	Chr1	COG0834	(ABC) transporter	Amino acid transport and metabolism	E	METABOLISM
gene3084	Chr1	COG0834	(ABC) transporter	Amino acid transport and metabolism	E	METABOLISM
gene1104	Chr1	ENOG410ZXQA	Cell surface protein	Function unknown	S	POORLY CHARACTERIZED
gene1106	Chr1	ENOG411003G	-	Function unknown	S	POORLY CHARACTERIZED
gene1108	Chr1	ENOG411003G	-	Function unknown	S	POORLY CHARACTERIZED
gene1112	Chr1	ENOG410ZX7I	transcriptional regulator	Transcription	K	INFORMATION STORAGE AND PROCESSING
gene1113	Chr1	COG4221	serine 3-dehydrogenase activity	Function unknown	S	POORLY CHARACTERIZED
gene1115	Chr1	COG4166	peptide transport	Amino acid transport and metabolism	E	METABOLISM
gene1890	Chr1	COG4166	peptide transport	Amino acid transport and metabolism	E	METABOLISM
gene1122	Chr1	COG0435	glutathione Stransferase	Post-translational modification, protein turnover, chaperones	O	CELLULAR PROCESSES AND SIGNALING
gene1123	Chr1	COG3501	Rhs element vgr protein	Function unknown	S	POORLY CHARACTERIZED
gene1833	Chr1	COG3501	Rhs element vgr protein	Function unknown	S	POORLY CHARACTERIZED
gene1958	Chr1	COG3501	Rhs element vgr protein	Function unknown	S	POORLY CHARACTERIZED
gene1127	Chr1	ENOG4111YQQ	-	Function unknown	S	POORLY CHARACTERIZED
gene1133	Chr1	ENOG410XQBJ	domain protein	Cell wall/membrane/envelope biogenesis	M	CELLULAR PROCESSES AND SIGNALING
gene1135	Chr1	ENOG410XQBJ	domain protein	Cell wall/membrane/envelope biogenesis	M	CELLULAR PROCESSES AND SIGNALING
gene1139	Chr1	ENOG410XUWY	Protein of unknown function (DUF3081)	Function unknown	S	POORLY CHARACTERIZED
gene1140	Chr1	COG0280	phosphate acetyltransferase	Energy production and conversion	C	METABOLISM
gene1141	Chr1	COG0282	acetate kinase activity	Energy production and conversion	C	METABOLISM
gene1142	Chr1	COG3092	UPF0208 membrane protein	Function unknown	S	POORLY CHARACTERIZED
gene1144	Chr1	COG0686	alanine dehydrogenase	Amino acid transport and metabolism	E	METABOLISM
gene1146	Chr1	COG1674	cell division protein FtsK	Cell cycle control, cell division, chromosome partitioning	D	CELLULAR PROCESSES AND SIGNALING
gene1147	Chr1	COG1495	Required for disulfide bond formation in some periplasmic proteins. Acts by oxidizing the DsbA protein (By similarity)	Post-translational modification, protein turnover, chaperones	O	CELLULAR PROCESSES AND SIGNALING
gene1148	Chr1	COG3067	Na( ) H( ) antiporter that extrudes sodium in exchange for external protons (By similarity)	Inorganic ion transport and metabolism	P	METABOLISM
gene1150	Chr1	COG1018	Is involved in NO detoxification in an aerobic process, termed nitric oxide dioxygenase (NOD) reaction that utilizes O(2) and NAD(P)H to convert NO to nitrate, which protects the bacterium from various noxious nitrogen compounds. Therefore, plays a central role in the inducible response to nitrosative stress (By similarity)	Energy production and conversion	C	METABOLISM
gene1151	Chr1	COG1151	Catalyzes the reduction of hydroxylamine to form NH(3) and H(2)O (By similarity)	Energy production and conversion	C	METABOLISM
gene1152	Chr1	COG3604	Transcriptional regulator	Transcription	K	INFORMATION STORAGE AND PROCESSING
gene1153	Chr1	ENOG4111SDY	Domain of unknown function (DUF1887)	Function unknown	S	POORLY CHARACTERIZED
gene1154	Chr1	ENOG410YRU4	methyl-accepting chemotaxis protein	Function unknown	S	POORLY CHARACTERIZED
gene1155	Chr1	COG0537	histidine triad (hIT) protein	Nucleotide transport and metabolism; Carbohydrate transport and metabolism	F;G	METABOLISM;METABOLISM
gene2112	Chr1	COG0537	histidine triad (hIT) protein	Nucleotide transport and metabolism; Carbohydrate transport and metabolism	F;G	METABOLISM;METABOLISM
gene1156	Chr1	COG3014	(LipO)protein	Function unknown	S	POORLY CHARACTERIZED
gene1157	Chr1	COG5633	(Lipo)protein	Function unknown	S	POORLY CHARACTERIZED
gene1158	Chr1	COG3417	Regulator of peptidoglycan synthesis that is essential for the function of penicillin-binding protein 1B (PBP1b) (By similarity)	Function unknown	S	POORLY CHARACTERIZED
gene1159	Chr1	COG0510	Ethanolamine kinase	Cell wall/membrane/envelope biogenesis	M	CELLULAR PROCESSES AND SIGNALING
gene1160	Chr1	COG3150	UPF0227 protein	Function unknown	S	POORLY CHARACTERIZED
gene2460	Chr1	COG3150	UPF0227 protein	Function unknown	S	POORLY CHARACTERIZED
gene1162	Chr1	COG1252	Nadh dehydrogenase	Energy production and conversion	C	METABOLISM
gene1808	Chr1	COG1252	Nadh dehydrogenase	Energy production and conversion	C	METABOLISM
gene1163	Chr1	COG1670	-acetyltransferase	Translation, ribosomal structure and biogenesis	J	INFORMATION STORAGE AND PROCESSING
gene1298	Chr1	COG1670	-acetyltransferase	Translation, ribosomal structure and biogenesis	J	INFORMATION STORAGE AND PROCESSING
gene1813	Chr1	COG1670	-acetyltransferase	Translation, ribosomal structure and biogenesis	J	INFORMATION STORAGE AND PROCESSING
gene2207	Chr1	COG1670	-acetyltransferase	Translation, ribosomal structure and biogenesis	J	INFORMATION STORAGE AND PROCESSING
gene1164	Chr1	ENOG411269W	Protein of unknown function (DUF2803)	Function unknown	S	POORLY CHARACTERIZED
gene1165	Chr1	COG1197	transcriptioN-repair coupling factor	Replication, recombination and repair	L	INFORMATION STORAGE AND PROCESSING
gene1166	Chr1	ENOG4111VG2	-	Function unknown	S	POORLY CHARACTERIZED
gene1167	Chr1	COG4591	lipoprotein releasing system transmembrane protein	Cell wall/membrane/envelope biogenesis	M	CELLULAR PROCESSES AND SIGNALING
gene1169	Chr1	COG4591	lipoprotein releasing system transmembrane protein	Cell wall/membrane/envelope biogenesis	M	CELLULAR PROCESSES AND SIGNALING
gene1195	Chr1	COG4591	lipoprotein releasing system transmembrane protein	Cell wall/membrane/envelope biogenesis	M	CELLULAR PROCESSES AND SIGNALING
gene1168	Chr1	COG1136	(ABC) transporter	Defense mechanisms	V	CELLULAR PROCESSES AND SIGNALING
gene1196	Chr1	COG1136	(ABC) transporter	Defense mechanisms	V	CELLULAR PROCESSES AND SIGNALING
gene1347	Chr1	COG1136	(ABC) transporter	Defense mechanisms	V	CELLULAR PROCESSES AND SIGNALING
gene2736	Chr1	COG1136	(ABC) transporter	Defense mechanisms	V	CELLULAR PROCESSES AND SIGNALING
gene1171	Chr1	COG3216	Uncharacterized protein conserved in bacteria (DUF2062)	Function unknown	S	POORLY CHARACTERIZED
gene1172	Chr1	COG0658	DNA internalization-related competence protein ComEC Rec2	Function unknown	S	POORLY CHARACTERIZED
gene1173	Chr1	COG1132	(ABC) transporter	Defense mechanisms	V	CELLULAR PROCESSES AND SIGNALING
gene1530	Chr1	COG1132	(ABC) transporter	Defense mechanisms	V	CELLULAR PROCESSES AND SIGNALING
gene1174	Chr1	COG1663	Transfers the gamma-phosphate of ATP to the 4'-position of a tetraacyldisaccharide 1-phosphate intermediate (termed DS-1- P) to form tetraacyldisaccharide 1,4'-bis-phosphate (lipid IVA) (By similarity)	Cell wall/membrane/envelope biogenesis	M	CELLULAR PROCESSES AND SIGNALING
gene1175	Chr1	COG2835	UPF0434 protein	Function unknown	S	POORLY CHARACTERIZED
gene1176	Chr1	COG1212	Activates KDO (a required 8-carbon sugar) for incorporation into bacterial lipopolysaccharide in Gram-negative bacteria (By similarity)	Cell wall/membrane/envelope biogenesis	M	CELLULAR PROCESSES AND SIGNALING
gene1177	Chr1	COG2719	spovr family	Function unknown	S	POORLY CHARACTERIZED
gene1178	Chr1	COG2718	UPF0229 protein	Function unknown	S	POORLY CHARACTERIZED
gene1179	Chr1	COG2766	Serine protein kinase	Signal transduction mechanisms	T	CELLULAR PROCESSES AND SIGNALING
gene1180	Chr1	COG3713	MltA-interacting MipA family protein	Cell wall/membrane/envelope biogenesis	M	CELLULAR PROCESSES AND SIGNALING
gene1181	Chr1	COG3013	UPF0304 protein	Function unknown	S	POORLY CHARACTERIZED
gene1182	Chr1	COG3049	Choloylglycine hydrolase	Cell wall/membrane/envelope biogenesis	M	CELLULAR PROCESSES AND SIGNALING
gene1797	Chr1	COG3049	Choloylglycine hydrolase	Cell wall/membrane/envelope biogenesis	M	CELLULAR PROCESSES AND SIGNALING
gene1183	Chr1	COG1180	activating enzyme	Post-translational modification, protein turnover, chaperones	O	CELLULAR PROCESSES AND SIGNALING
gene1371	Chr1	COG1180	activating enzyme	Post-translational modification, protein turnover, chaperones	O	CELLULAR PROCESSES AND SIGNALING
gene1184	Chr1	COG3528	Membrane	Function unknown	S	POORLY CHARACTERIZED
gene1185	Chr1	COG1882	formate acetyltransferase	Energy production and conversion	C	METABOLISM
gene1186	Chr1	ENOG410XRKA	Protein of unknown function (DUF3360)	Function unknown	S	POORLY CHARACTERIZED
gene1767	Chr1	ENOG410XRKA	Protein of unknown function (DUF3360)	Function unknown	S	POORLY CHARACTERIZED
gene1187	Chr1	COG4598	ABC transporter, (ATP-binding protein)	Amino acid transport and metabolism	E	METABOLISM
gene1189	Chr1	COG4215	(ABC) transporter	Amino acid transport and metabolism	E	METABOLISM
gene1615	Chr1	COG4215	(ABC) transporter	Amino acid transport and metabolism	E	METABOLISM
gene1190	Chr1	COG4160	(ABC) transporter	Amino acid transport and metabolism	E	METABOLISM
gene1616	Chr1	COG4160	(ABC) transporter	Amino acid transport and metabolism	E	METABOLISM
gene1192	Chr1	COG2972	Histidine kinase	Signal transduction mechanisms	T	CELLULAR PROCESSES AND SIGNALING
gene1193	Chr1	ENOG410YPU3	-	Function unknown	S	POORLY CHARACTERIZED
gene1194	Chr1	ENOG4111PRF	-	Function unknown	S	POORLY CHARACTERIZED
gene1197	Chr1	ENOG41129PI	-	Function unknown	S	POORLY CHARACTERIZED
gene1201	Chr1	ENOG410XY8K	-	Function unknown	S	POORLY CHARACTERIZED
gene1203	Chr1	COG2818	DNA-3-methyladenine glycosylase activity	Replication, recombination and repair	L	INFORMATION STORAGE AND PROCESSING
gene1881	Chr1	COG2818	DNA-3-methyladenine glycosylase activity	Replication, recombination and repair	L	INFORMATION STORAGE AND PROCESSING
gene1209	Chr1	ENOG4111U9R	Domain of unknown function (DUF2760)	Function unknown	S	POORLY CHARACTERIZED
gene1211	Chr1	ENOG4111K7Y	exonuclease rnase t and DNA polymerase iii	Replication, recombination and repair	L	INFORMATION STORAGE AND PROCESSING
gene1212	Chr1	COG4103	Tellurite resistance protein TerB	Function unknown	S	POORLY CHARACTERIZED
gene1213	Chr1	ENOG410XNUD	-	Function unknown	S	POORLY CHARACTERIZED
gene1215	Chr1	ENOG410XQR3	MltA-Interacting MipA	Function unknown	S	POORLY CHARACTERIZED
gene1217	Chr1	ENOG410XTKF	OmpA-like transmembrane domain	Function unknown	S	POORLY CHARACTERIZED
gene1218	Chr1	ENOG410XXKF	rdd domain-containing protein	Function unknown	S	POORLY CHARACTERIZED
gene1219	Chr1	COG1301	sodium dicarboxylate symporter	Energy production and conversion	C	METABOLISM
gene1807	Chr1	COG1301	sodium dicarboxylate symporter	Energy production and conversion	C	METABOLISM
gene2260	Chr1	COG1301	sodium dicarboxylate symporter	Energy production and conversion	C	METABOLISM
gene2975	Chr1	COG1301	sodium dicarboxylate symporter	Energy production and conversion	C	METABOLISM
gene1220	Chr1	COG0159	The alpha subunit is responsible for the aldol cleavage of indoleglycerol phosphate to indole and glyceraldehyde 3- phosphate (By similarity)	Amino acid transport and metabolism	E	METABOLISM
gene1221	Chr1	COG0133	The beta subunit is responsible for the synthesis of L- tryptophan from indole and L-serine (By similarity)	Amino acid transport and metabolism	E	METABOLISM
gene1222	Chr1	COG0134	indole-3-glycerol phosphate synthase	Amino acid transport and metabolism	E	METABOLISM
gene1223	Chr1	COG0547	Anthranilate phosphoribosyltransferase	Amino acid transport and metabolism	E	METABOLISM
gene1225	Chr1	COG0147	synthase (Component I)	Amino acid transport and metabolism	E	METABOLISM
gene1292	Chr1	COG0147	synthase (Component I)	Amino acid transport and metabolism	E	METABOLISM
gene1227	Chr1	COG0613	DNA-directed DNA polymerase activity	Function unknown	S	POORLY CHARACTERIZED
gene1229	Chr1	COG1187	pseudouridine synthase activity	Translation, ribosomal structure and biogenesis	J	INFORMATION STORAGE AND PROCESSING
gene1339	Chr1	COG1187	pseudouridine synthase activity	Translation, ribosomal structure and biogenesis	J	INFORMATION STORAGE AND PROCESSING
gene1752	Chr1	COG1187	pseudouridine synthase activity	Translation, ribosomal structure and biogenesis	J	INFORMATION STORAGE AND PROCESSING
gene2010	Chr1	COG1187	pseudouridine synthase activity	Translation, ribosomal structure and biogenesis	J	INFORMATION STORAGE AND PROCESSING
gene2238	Chr1	COG1187	pseudouridine synthase activity	Translation, ribosomal structure and biogenesis	J	INFORMATION STORAGE AND PROCESSING
gene1231	Chr1	COG3437	Response Regulator	Signal transduction mechanisms	T	CELLULAR PROCESSES AND SIGNALING
gene1232	Chr1	COG3437	Response Regulator	Signal transduction mechanisms	T	CELLULAR PROCESSES AND SIGNALING
gene1237	Chr1	COG2509	fad dependent oxidoreductase	Function unknown	S	POORLY CHARACTERIZED
gene1238	Chr1	COG1146	metal cluster binding	Energy production and conversion	C	METABOLISM
gene1240	Chr1	COG3930	Domain of unknown function (DUF1704)	Function unknown	S	POORLY CHARACTERIZED
gene1242	Chr1	ENOG410XQ7Y	surface antigen	Function unknown	S	POORLY CHARACTERIZED
gene1744	Chr1	ENOG410XQ7Y	surface antigen	Function unknown	S	POORLY CHARACTERIZED
gene1244	Chr1	COG3547	Transposase	Replication, recombination and repair	L	INFORMATION STORAGE AND PROCESSING
gene1777	Chr1	COG3547	Transposase	Replication, recombination and repair	L	INFORMATION STORAGE AND PROCESSING
gene1829	Chr1	COG3547	Transposase	Replication, recombination and repair	L	INFORMATION STORAGE AND PROCESSING
gene1705	Chr1	COG3547	Transposase	Replication, recombination and repair	L	INFORMATION STORAGE AND PROCESSING
gene1246	Chr1	ENOG410ZTCI	-	Function unknown	S	POORLY CHARACTERIZED
gene1247	Chr1	ENOG410Y3PY	-	Function unknown	S	POORLY CHARACTERIZED
gene1249	Chr1	ENOG410YGVR	-	Function unknown	S	POORLY CHARACTERIZED
gene1252	Chr1	ENOG4111YQS	-	Function unknown	S	POORLY CHARACTERIZED
gene1257	Chr1	COG0513	purine NTP-dependent helicase activity	Replication, recombination and repair	L	INFORMATION STORAGE AND PROCESSING
gene1801	Chr1	COG0513	purine NTP-dependent helicase activity	Replication, recombination and repair	L	INFORMATION STORAGE AND PROCESSING
gene2494	Chr1	COG0513	purine NTP-dependent helicase activity	Replication, recombination and repair	L	INFORMATION STORAGE AND PROCESSING
gene2958	Chr1	COG0513	purine NTP-dependent helicase activity	Replication, recombination and repair	L	INFORMATION STORAGE AND PROCESSING
gene1258	Chr1	ENOG41129GD	transcriptional regulator	Transcription	K	INFORMATION STORAGE AND PROCESSING
gene1261	Chr1	COG0225	Has an important function as a repair enzyme for proteins that have been inactivated by oxidation. Catalyzes the reversible oxidation-reduction of methionine sulfoxide in proteins to methionine (By similarity)	Post-translational modification, protein turnover, chaperones	O	CELLULAR PROCESSES AND SIGNALING
gene2732	Chr1	COG0225	Has an important function as a repair enzyme for proteins that have been inactivated by oxidation. Catalyzes the reversible oxidation-reduction of methionine sulfoxide in proteins to methionine (By similarity)	Post-translational modification, protein turnover, chaperones	O	CELLULAR PROCESSES AND SIGNALING
gene1266	Chr1	COG4987	(ABC) transporter	Defense mechanisms	V	CELLULAR PROCESSES AND SIGNALING
gene1267	Chr1	COG4988	cysteine transport	Defense mechanisms	V	CELLULAR PROCESSES AND SIGNALING
gene1268	Chr1	COG0492	thioredoxin reductase	Post-translational modification, protein turnover, chaperones	O	CELLULAR PROCESSES AND SIGNALING
gene1269	Chr1	COG4340	Pfam:DUF2257	Function unknown	S	POORLY CHARACTERIZED
gene1271	Chr1	ENOG410XPG1	Protein of unknown function (DUF2797)	Function unknown	S	POORLY CHARACTERIZED
gene1273	Chr1	COG2949	SanA protein	Function unknown	S	POORLY CHARACTERIZED
gene1274	Chr1	ENOG41123MS	Protein of unknown function (DUF3392)	Function unknown	S	POORLY CHARACTERIZED
gene1277	Chr1	ENOG4111UTS	-	Function unknown	S	POORLY CHARACTERIZED
gene1279	Chr1	COG1448	aminotransferase	Amino acid transport and metabolism	E	METABOLISM
gene1281	Chr1	ENOG410YXTZ	-	Function unknown	S	POORLY CHARACTERIZED
gene1282	Chr1	COG0017	asparaginyl-tRNA synthetase	Translation, ribosomal structure and biogenesis	J	INFORMATION STORAGE AND PROCESSING
gene1684	Chr1	COG4886	leucine Rich Repeat	Function unknown	S	POORLY CHARACTERIZED
gene1763	Chr1	COG4886	leucine Rich Repeat	Function unknown	S	POORLY CHARACTERIZED
gene1781	Chr1	COG4886	leucine Rich Repeat	Function unknown	S	POORLY CHARACTERIZED
gene1285	Chr1	COG0720	6-pyruvoyltetrahydropterin synthase activity	Coenzyme transport and metabolism	H	METABOLISM
gene1286	Chr1	ENOG4111Z72	acetyltransferase	Function unknown	S	POORLY CHARACTERIZED
gene1287	Chr1	COG1760	L-serine dehydratase	Amino acid transport and metabolism	E	METABOLISM
gene1288	Chr1	COG0814	amino acid transport	Amino acid transport and metabolism	E	METABOLISM
gene1290	Chr1	ENOG4111UBD	Heme NO binding domain protein	Function unknown	S	POORLY CHARACTERIZED
gene1293	Chr1	COG1951	fumarate	Energy production and conversion	C	METABOLISM
gene1295	Chr1	COG3106	amino acid regulated cytosolic protein	Function unknown	S	POORLY CHARACTERIZED
gene1296	Chr1	COG3768	UPF0283 membrane protein	Function unknown	S	POORLY CHARACTERIZED
gene1297	Chr1	COG3283	Transcriptional regulator	Transcription	K	INFORMATION STORAGE AND PROCESSING
gene1300	Chr1	ENOG4111NBC	Protein of unknown function (DUF2947)	Function unknown	S	POORLY CHARACTERIZED
gene1303	Chr1	COG3487	Iron-regulated protein	Inorganic ion transport and metabolism	P	METABOLISM
gene1304	Chr1	COG3487	Iron-regulated protein	Inorganic ion transport and metabolism	P	METABOLISM
gene1305	Chr1	COG3488	Thiol oxidoreductase	Energy production and conversion	C	METABOLISM
gene1306	Chr1	COG3489	Iron-regulated protein A	Function unknown	S	POORLY CHARACTERIZED
gene1307	Chr1	COG3490	(twin-arginine translocation) pathway signal	Function unknown	S	POORLY CHARACTERIZED
gene1308	Chr1	COG2989	ErfK YbiS YcfS YnhG family protein	Function unknown	S	POORLY CHARACTERIZED
gene1309	Chr1	COG3108	Bacterial protein of unknown function (DUF882)	Function unknown	S	POORLY CHARACTERIZED
gene1311	Chr1	ENOG4112C36	Protein of unknown function (DUF2982)	Function unknown	S	POORLY CHARACTERIZED
gene1313	Chr1	COG4663	extracellular solute-binding protein, family 7	Secondary metabolites biosynthesis, transport and catabolism	Q	METABOLISM
gene2663	Chr1	COG4663	extracellular solute-binding protein, family 7	Secondary metabolites biosynthesis, transport and catabolism	Q	METABOLISM
gene1314	Chr1	COG4665	Tripartite ATP-independent periplasmic transporter dctq component	Secondary metabolites biosynthesis, transport and catabolism	Q	METABOLISM
gene1315	Chr1	COG4664	trap dicarboxylate transporter dctm subunit	Secondary metabolites biosynthesis, transport and catabolism	Q	METABOLISM
gene1317	Chr1	COG2197	Two component transcriptional regulator, LuxR family	Signal transduction mechanisms	T	CELLULAR PROCESSES AND SIGNALING
gene1850	Chr1	COG2197	Two component transcriptional regulator, LuxR family	Signal transduction mechanisms	T	CELLULAR PROCESSES AND SIGNALING
gene2835	Chr1	COG2197	Two component transcriptional regulator, LuxR family	Signal transduction mechanisms	T	CELLULAR PROCESSES AND SIGNALING
gene1318	Chr1	ENOG410XPW8	PEP phosphonomutase family protein	Function unknown	S	POORLY CHARACTERIZED
gene1323	Chr1	COG3805	dopa 4,5-dioxygenase	Secondary metabolites biosynthesis, transport and catabolism	Q	METABOLISM
gene1324	Chr1	COG0783	oxidoreductase activity, oxidizing metal ions	Inorganic ion transport and metabolism	P	METABOLISM
gene1327	Chr1	COG2962	rard protein	Function unknown	S	POORLY CHARACTERIZED
gene2963	Chr1	COG2962	rard protein	Function unknown	S	POORLY CHARACTERIZED
gene1329	Chr1	COG1825	This is one of the proteins that binds to the 5S RNA in the ribosome where it forms part of the central protuberance (By similarity)	Translation, ribosomal structure and biogenesis	J	INFORMATION STORAGE AND PROCESSING
gene1332	Chr1	ENOG410XXRK	-	Function unknown	S	POORLY CHARACTERIZED
gene1333	Chr1	COG2207	Transcriptional Regulator AraC Family	Transcription	K	INFORMATION STORAGE AND PROCESSING
gene2117	Chr1	COG2207	Transcriptional Regulator AraC Family	Transcription	K	INFORMATION STORAGE AND PROCESSING
gene2395	Chr1	COG2207	Transcriptional Regulator AraC Family	Transcription	K	INFORMATION STORAGE AND PROCESSING
gene2964	Chr1	COG2207	Transcriptional Regulator AraC Family	Transcription	K	INFORMATION STORAGE AND PROCESSING
gene1336	Chr1	ENOG4111FPD	Two component transcriptional regulator, winged helix family	Signal transduction mechanisms	T	CELLULAR PROCESSES AND SIGNALING
gene1337	Chr1	COG3212	Peptidase propeptide and YPEB domain protein	Function unknown	S	POORLY CHARACTERIZED
gene1340	Chr1	ENOG410XNNX	drug resistance transporter, Bcr CflA	Inorganic ion transport and metabolism	P	METABOLISM
gene3032	Chr1	ENOG410XNNX	drug resistance transporter, Bcr CflA	Inorganic ion transport and metabolism	P	METABOLISM
gene3098	Chr2	ENOG410XNNX	drug resistance transporter, Bcr CflA	Inorganic ion transport and metabolism	P	METABOLISM
gene3101	Chr2	ENOG410XNNX	drug resistance transporter, Bcr CflA	Inorganic ion transport and metabolism	P	METABOLISM
gene3105	Chr2	ENOG410XNNX	drug resistance transporter, Bcr CflA	Inorganic ion transport and metabolism	P	METABOLISM
gene3106	Chr2	ENOG410XNNX	drug resistance transporter, Bcr CflA	Inorganic ion transport and metabolism	P	METABOLISM
gene3109	Chr2	ENOG410XNNX	drug resistance transporter, Bcr CflA	Inorganic ion transport and metabolism	P	METABOLISM
gene1343	Chr1	COG1115	amino acid carrier protein	Amino acid transport and metabolism	E	METABOLISM
gene1671	Chr1	COG1115	amino acid carrier protein	Amino acid transport and metabolism	E	METABOLISM
gene2306	Chr1	COG1115	amino acid carrier protein	Amino acid transport and metabolism	E	METABOLISM
gene2411	Chr1	COG1115	amino acid carrier protein	Amino acid transport and metabolism	E	METABOLISM
gene1345	Chr1	COG0702	epimerase dehydratase	Carbohydrate transport and metabolism; Cell wall/membrane/envelope biogenesis	G;M	METABOLISM;CELLULAR PROCESSES AND SIGNALING
gene1589	Chr1	COG0702	epimerase dehydratase	Carbohydrate transport and metabolism; Cell wall/membrane/envelope biogenesis	G;M	METABOLISM;CELLULAR PROCESSES AND SIGNALING
gene1348	Chr1	COG0577	ABC transporter (permease)	Defense mechanisms	V	CELLULAR PROCESSES AND SIGNALING
gene2737	Chr1	COG0577	ABC transporter (permease)	Defense mechanisms	V	CELLULAR PROCESSES AND SIGNALING
gene1349	Chr1	COG5621	secreted hydrolase-like protein	Function unknown	S	POORLY CHARACTERIZED
gene1350	Chr1	COG3004	Na( ) H( ) antiporter that extrudes sodium in exchange for external protons (By similarity)	Inorganic ion transport and metabolism	P	METABOLISM
gene1352	Chr1	COG1538	Membrane	Cell wall/membrane/envelope biogenesis	M	CELLULAR PROCESSES AND SIGNALING
gene1551	Chr1	COG1538	Membrane	Cell wall/membrane/envelope biogenesis	M	CELLULAR PROCESSES AND SIGNALING
gene1562	Chr1	COG1538	Membrane	Cell wall/membrane/envelope biogenesis	M	CELLULAR PROCESSES AND SIGNALING
gene2464	Chr1	COG1538	Membrane	Cell wall/membrane/envelope biogenesis	M	CELLULAR PROCESSES AND SIGNALING
gene1354	Chr1	COG0076	decarboxylase	Amino acid transport and metabolism	E	METABOLISM
gene1652	Chr1	COG0076	decarboxylase	Amino acid transport and metabolism	E	METABOLISM
gene1355	Chr1	COG1748	saccharopine dehydrogenase	Amino acid transport and metabolism	E	METABOLISM
gene1356	Chr1	COG0019	Specifically catalyzes the decarboxylation of meso- diaminopimelate (meso-DAP) to L-lysine (By similarity)	Amino acid transport and metabolism	E	METABOLISM
gene2930	Chr1	COG0019	Specifically catalyzes the decarboxylation of meso- diaminopimelate (meso-DAP) to L-lysine (By similarity)	Amino acid transport and metabolism	E	METABOLISM
gene1359	Chr1	ENOG410XR5V	-	Function unknown	S	POORLY CHARACTERIZED
gene1360	Chr1	COG1058	competence damage-inducible protein	Coenzyme transport and metabolism	H	METABOLISM
gene1363	Chr1	COG0208	Provides the precursors necessary for DNA synthesis. Catalyzes the biosynthesis of deoxyribonucleotides from the corresponding ribonucleotides (By similarity)	Nucleotide transport and metabolism	F	METABOLISM
gene1364	Chr1	COG0209	Provides the precursors necessary for DNA synthesis. Catalyzes the biosynthesis of deoxyribonucleotides from the corresponding ribonucleotides (By similarity)	Nucleotide transport and metabolism	F	METABOLISM
gene1365	Chr1	COG2227	Non-specific O-methyltransferase that catalyzes the 2 O- methylation steps in the ubiquinone biosynthetic pathway (By similarity)	Coenzyme transport and metabolism	H	METABOLISM
gene1366	Chr1	COG0188	DNA gyrase negatively supercoils closed circular double- stranded DNA in an ATP-dependent manner and also catalyzes the interconversion of other topological isomers of double-stranded DNA rings, including catenanes and knotted rings (By similarity)	Replication, recombination and repair	L	INFORMATION STORAGE AND PROCESSING
gene2458	Chr1	COG0188	DNA gyrase negatively supercoils closed circular double- stranded DNA in an ATP-dependent manner and also catalyzes the interconversion of other topological isomers of double-stranded DNA rings, including catenanes and knotted rings (By similarity)	Replication, recombination and repair	L	INFORMATION STORAGE AND PROCESSING
gene1367	Chr1	COG1280	Lysine exporter protein (Lyse ygga)	Amino acid transport and metabolism	E	METABOLISM
gene1436	Chr1	COG1280	Lysine exporter protein (Lyse ygga)	Amino acid transport and metabolism	E	METABOLISM
gene1672	Chr1	COG1280	Lysine exporter protein (Lyse ygga)	Amino acid transport and metabolism	E	METABOLISM
gene2920	Chr1	COG1280	Lysine exporter protein (Lyse ygga)	Amino acid transport and metabolism	E	METABOLISM
gene2965	Chr1	COG1280	Lysine exporter protein (Lyse ygga)	Amino acid transport and metabolism	E	METABOLISM
gene1370	Chr1	ENOG410XNMQ	glycine radical enzyme YjjI family	Function unknown	S	POORLY CHARACTERIZED
gene1373	Chr1	COG0152	SAICAR synthetase	Nucleotide transport and metabolism	F	METABOLISM
gene1375	Chr1	COG0584	glycerophosphoryl diester phosphodiesterase	Energy production and conversion	C	METABOLISM
gene1381	Chr1	ENOG4110KXX	TonB system biopolymer transport component	Function unknown	S	POORLY CHARACTERIZED
gene1386	Chr1	COG0457	repeat-containing protein	Function unknown	S	POORLY CHARACTERIZED
gene1554	Chr1	COG0457	repeat-containing protein	Function unknown	S	POORLY CHARACTERIZED
gene2189	Chr1	COG0457	repeat-containing protein	Function unknown	S	POORLY CHARACTERIZED
gene2381	Chr1	COG0457	repeat-containing protein	Function unknown	S	POORLY CHARACTERIZED
gene1387	Chr1	COG0765	amino acid AbC transporter	Amino acid transport and metabolism	E	METABOLISM
gene1389	Chr1	COG0765	amino acid AbC transporter	Amino acid transport and metabolism	E	METABOLISM
gene1542	Chr1	COG0765	amino acid AbC transporter	Amino acid transport and metabolism	E	METABOLISM
gene3083	Chr1	COG0765	amino acid AbC transporter	Amino acid transport and metabolism	E	METABOLISM
gene1388	Chr1	ENOG410ZHS8	amino acid AbC transporter	Amino acid transport and metabolism	E	METABOLISM
gene1390	Chr1	COG1126	ABC transporter, (ATP-binding protein)	Amino acid transport and metabolism	E	METABOLISM
gene1543	Chr1	COG1126	ABC transporter, (ATP-binding protein)	Amino acid transport and metabolism	E	METABOLISM
gene3082	Chr1	COG1126	ABC transporter, (ATP-binding protein)	Amino acid transport and metabolism	E	METABOLISM
gene1392	Chr1	ENOG4111RBA	Diguanylate cyclase	Signal transduction mechanisms	T	CELLULAR PROCESSES AND SIGNALING
gene1393	Chr1	ENOG4111RBA	Diguanylate cyclase	Signal transduction mechanisms	T	CELLULAR PROCESSES AND SIGNALING
gene1394	Chr1	ENOG41121P6	Polysaccharide Biosynthesis Protein	Cell wall/membrane/envelope biogenesis	M	CELLULAR PROCESSES AND SIGNALING
gene1395	Chr1	COG5001	Diguanylate cyclase phosphodiesterase	Signal transduction mechanisms	T	CELLULAR PROCESSES AND SIGNALING
gene1397	Chr1	COG0724	Rna-binding protein	Function unknown	S	POORLY CHARACTERIZED
gene2883	Chr1	COG0724	Rna-binding protein	Function unknown	S	POORLY CHARACTERIZED
gene1402	Chr1	COG1215	Glycosyl transferase, family 2	Cell wall/membrane/envelope biogenesis	M	CELLULAR PROCESSES AND SIGNALING
gene1404	Chr1	ENOG410ZWJV	Polysaccharide chain length determinant protein	Cell wall/membrane/envelope biogenesis	M	CELLULAR PROCESSES AND SIGNALING
gene1405	Chr1	ENOG410XSMN	glycosyl transferase group 1	Cell wall/membrane/envelope biogenesis	M	CELLULAR PROCESSES AND SIGNALING
gene1407	Chr1	ENOG410Z4KP	O-Antigen Polymerase	Cell wall/membrane/envelope biogenesis	M	CELLULAR PROCESSES AND SIGNALING
gene1409	Chr1	ENOG410Y6VF	Glycosyl transferases group 1	Cell wall/membrane/envelope biogenesis	M	CELLULAR PROCESSES AND SIGNALING
gene1416	Chr1	COG1596	polysaccharide transmembrane transporter activity	Cell wall/membrane/envelope biogenesis	M	CELLULAR PROCESSES AND SIGNALING
gene1418	Chr1	ENOG410ZIFJ	factor. Antagonist	Signal transduction mechanisms	T	CELLULAR PROCESSES AND SIGNALING
gene1419	Chr1	COG1793	DNA ligase	Replication, recombination and repair	L	INFORMATION STORAGE AND PROCESSING
gene1420	Chr1	COG1737	Transcriptional regulator	Transcription	K	INFORMATION STORAGE AND PROCESSING
gene1653	Chr1	COG1737	Transcriptional regulator	Transcription	K	INFORMATION STORAGE AND PROCESSING
gene1749	Chr1	COG1737	Transcriptional regulator	Transcription	K	INFORMATION STORAGE AND PROCESSING
gene1421	Chr1	COG2103	Specifically catalyzes the cleavage of the D-lactyl ether substituent of MurNAc 6-phosphate, producing GlcNAc 6- phosphate and D-lactate	Function unknown	S	POORLY CHARACTERIZED
gene1751	Chr1	COG2103	Specifically catalyzes the cleavage of the D-lactyl ether substituent of MurNAc 6-phosphate, producing GlcNAc 6- phosphate and D-lactate	Function unknown	S	POORLY CHARACTERIZED
gene1423	Chr1	ENOG410XPEQ	Domain of Unknown Function (DUF748)	Function unknown	S	POORLY CHARACTERIZED
gene1424	Chr1	COG4912	DNA alkylation repair enzyme	Replication, recombination and repair	L	INFORMATION STORAGE AND PROCESSING
gene1426	Chr1	COG3791	Glutathione-dependent formaldehyde-activating Gfa	Function unknown	S	POORLY CHARACTERIZED
gene2666	Chr1	COG3791	Glutathione-dependent formaldehyde-activating Gfa	Function unknown	S	POORLY CHARACTERIZED
gene1427	Chr1	ENOG410YE4T	Type I phosphodiesterase / nucleotide pyrophosphatase	Function unknown	S	POORLY CHARACTERIZED
gene1430	Chr1	COG1257	)-reductase	Lipid transport and metabolism	I	METABOLISM
gene1431	Chr1	ENOG41124FE	Transcriptional regulator, LysR family	Transcription	K	INFORMATION STORAGE AND PROCESSING
gene1445	Chr1	ENOG41124KN	-	Function unknown	S	POORLY CHARACTERIZED
gene1446	Chr1	COG3001	Fructosamine	Carbohydrate transport and metabolism	G	METABOLISM
gene1447	Chr1	ENOG411268R	type IIA topoisomerase, B subunit	Function unknown	S	POORLY CHARACTERIZED
gene1448	Chr1	COG0791	NLP P60 protein	Cell wall/membrane/envelope biogenesis	M	CELLULAR PROCESSES AND SIGNALING
gene1449	Chr1	ENOG410Z37N	methyl-accepting chemotaxis protein	Function unknown	S	POORLY CHARACTERIZED
gene1450	Chr1	COG3000	fatty acid hydroxylase	Lipid transport and metabolism	I	METABOLISM
gene1453	Chr1	ENOG41129XR	Protein of unknown function (DUF2960)	Function unknown	S	POORLY CHARACTERIZED
gene1454	Chr1	COG0303	Molybdenum cofactor synthesis domain protein	Coenzyme transport and metabolism	H	METABOLISM
gene1455	Chr1	COG0746	Transfers a GMP moiety from GTP to Mo-molybdopterin (Mo- MPT) cofactor (Moco or molybdenum cofactor) to form Mo- molybdopterin guanine dinucleotide (Mo-MGD) cofactor (By similarity)	Coenzyme transport and metabolism	H	METABOLISM
gene1456	Chr1	COG1122	ATPase activity	Inorganic ion transport and metabolism	P	METABOLISM
gene1457	Chr1	COG4662	binding-protein-dependent transport systems inner membrane Component	Inorganic ion transport and metabolism	P	METABOLISM
gene1458	Chr1	COG2998	(ABC) transporter	Inorganic ion transport and metabolism	P	METABOLISM
gene1462	Chr1	ENOG410XSA0	TagA-related protein	Function unknown	S	POORLY CHARACTERIZED
gene1463	Chr1	COG0668	Mechanosensitive ion channel	Cell wall/membrane/envelope biogenesis	M	CELLULAR PROCESSES AND SIGNALING
gene2058	Chr1	COG0668	Mechanosensitive ion channel	Cell wall/membrane/envelope biogenesis	M	CELLULAR PROCESSES AND SIGNALING
gene2296	Chr1	COG0668	Mechanosensitive ion channel	Cell wall/membrane/envelope biogenesis	M	CELLULAR PROCESSES AND SIGNALING
gene2704	Chr1	COG0668	Mechanosensitive ion channel	Cell wall/membrane/envelope biogenesis	M	CELLULAR PROCESSES AND SIGNALING
gene1464	Chr1	ENOG410YNN3	-	Function unknown	S	POORLY CHARACTERIZED
gene1468	Chr1	ENOG410XRCX	Methyl-accepting chemotaxis	Function unknown	S	POORLY CHARACTERIZED
gene1469	Chr1	COG1526	Necessary for formate dehydrogenase activity (By similarity)	Energy production and conversion	C	METABOLISM
gene1470	Chr1	ENOG41126S7	Protein of unknown function (DUF3305)	Function unknown	S	POORLY CHARACTERIZED
gene1471	Chr1	ENOG410XY4P	Protein of unknown function (DUF3306)	Function unknown	S	POORLY CHARACTERIZED
gene1472	Chr1	COG1145	4Fe-4S ferredoxin, iron-sulfur binding	Energy production and conversion	C	METABOLISM
gene2355	Chr1	COG1145	4Fe-4S ferredoxin, iron-sulfur binding	Energy production and conversion	C	METABOLISM
gene1473	Chr1	COG3381	Involved in the biogenesis of TorA. Acts on TorA before the insertion of the molybdenum cofactor and, as a result, probably favors a conformation of the apoenzyme that is competent for acquiring the cofactor (By similarity)	Function unknown	S	POORLY CHARACTERIZED
gene2027	Chr1	COG3381	Involved in the biogenesis of TorA. Acts on TorA before the insertion of the molybdenum cofactor and, as a result, probably favors a conformation of the apoenzyme that is competent for acquiring the cofactor (By similarity)	Function unknown	S	POORLY CHARACTERIZED
gene1475	Chr1	COG0243	molybdopterin oxidoreductase	Energy production and conversion	C	METABOLISM
gene1994	Chr1	COG0243	molybdopterin oxidoreductase	Energy production and conversion	C	METABOLISM
gene1476	Chr1	COG0437	4fe-4S ferredoxin iron-sulfur binding domain protein	Energy production and conversion	C	METABOLISM
gene2175	Chr1	COG0437	4fe-4S ferredoxin iron-sulfur binding domain protein	Energy production and conversion	C	METABOLISM
gene1477	Chr1	COG2864	formate dehydrogenase, gamma subunit	Energy production and conversion	C	METABOLISM
gene1480	Chr1	COG0846	NAD-dependent protein deacetylase which modulates the activities of several enzymes which are inactive in their acetylated form	Transcription	K	INFORMATION STORAGE AND PROCESSING
gene1483	Chr1	COG1177	Binding-protein-dependent transport systems inner membrane component	Inorganic ion transport and metabolism	P	METABOLISM
gene1484	Chr1	COG1176	transporter activity	Inorganic ion transport and metabolism	P	METABOLISM
gene1486	Chr1	ENOG41125HF	-	Function unknown	S	POORLY CHARACTERIZED
gene1488	Chr1	ENOG4112D7U	Protein of unknown function (DUF2987)	Function unknown	S	POORLY CHARACTERIZED
gene1492	Chr1	COG2836	Membrane	Function unknown	S	POORLY CHARACTERIZED
gene1493	Chr1	COG3197	cytochrome oxidase maturation protein cbb3-type	Inorganic ion transport and metabolism	P	METABOLISM
gene1495	Chr1	COG3198	Membrane	Function unknown	S	POORLY CHARACTERIZED
gene1496	Chr1	COG2010	cytochrome c	Energy production and conversion	C	METABOLISM
gene1497	Chr1	ENOG410ZR9Z	Cytochrome	Energy production and conversion	C	METABOLISM
gene1498	Chr1	COG2993	cytochrome C oxidase	Energy production and conversion	C	METABOLISM
gene1499	Chr1	COG3278	cytochrome C oxidase, cbb3-type, subunit i	Energy production and conversion	C	METABOLISM
gene1503	Chr1	ENOG41121Y2	Exonuclease	Replication, recombination and repair	L	INFORMATION STORAGE AND PROCESSING
gene1504	Chr1	COG2946	Replication initiation factor	Replication, recombination and repair	L	INFORMATION STORAGE AND PROCESSING
gene1509	Chr1	COG4128	occludens toxin	Function unknown	S	POORLY CHARACTERIZED
gene1513	Chr1	ENOG410Z31S	Protein of unknown function (DUF3634)	Function unknown	S	POORLY CHARACTERIZED
gene1514	Chr1	COG3120	Required for spatial organization of the terminus region of the chromosome (Ter macrodomain) during the cell cycle. Prevents early segregation of duplicated Ter macrodomains during cell division. Binds specifically to matS, which is a 13 bp signature motif repeated within the Ter macrodomain (By similarity)	Function unknown	S	POORLY CHARACTERIZED
gene1515	Chr1	COG1067	atp-dependent protease	Post-translational modification, protein turnover, chaperones	O	CELLULAR PROCESSES AND SIGNALING
gene1517	Chr1	COG3130	During stationary phase, converts 70S ribosomes to an inactive dimeric form (100S ribosomes) (By similarity)	Translation, ribosomal structure and biogenesis	J	INFORMATION STORAGE AND PROCESSING
gene1518	Chr1	ENOG4111WSK	Protein of unknown function (DUF3466)	Function unknown	S	POORLY CHARACTERIZED
gene1521	Chr1	COG1092	23S rRNA (guanine(2445)-N(2))-methyltransferase activity	Function unknown	S	POORLY CHARACTERIZED
gene1548	Chr1	COG1092	23S rRNA (guanine(2445)-N(2))-methyltransferase activity	Function unknown	S	POORLY CHARACTERIZED
gene1875	Chr1	COG1092	23S rRNA (guanine(2445)-N(2))-methyltransferase activity	Function unknown	S	POORLY CHARACTERIZED
gene1522	Chr1	ENOG410YF51	Contributes to the efficiency of the cell division process by stabilizing the polymeric form of the cell division protein FtsZ. Acts by promoting interactions between FtsZ protofilaments and suppressing the GTPase activity of FtsZ (By similarity)	Cell cycle control, cell division, chromosome partitioning	D	CELLULAR PROCESSES AND SIGNALING
gene1523	Chr1	COG0167	Catalyzes the conversion of dihydroorotate to orotate	Nucleotide transport and metabolism	F	METABOLISM
gene1524	Chr1	COG2902	Dehydrogenase	Amino acid transport and metabolism	E	METABOLISM
gene1525	Chr1	COG0308	aminopeptidase	Amino acid transport and metabolism	E	METABOLISM
gene1527	Chr1	COG0793	protease	Cell wall/membrane/envelope biogenesis	M	CELLULAR PROCESSES AND SIGNALING
gene1528	Chr1	COG3109	may be a structural element that influences the osmotic activation of ProP at a post-translational level (By similarity)	Signal transduction mechanisms	T	CELLULAR PROCESSES AND SIGNALING
gene1529	Chr1	COG1956	gaf domain protein	Signal transduction mechanisms	T	CELLULAR PROCESSES AND SIGNALING
gene1531	Chr1	COG2995	paraquat-inducible protein a	Function unknown	S	POORLY CHARACTERIZED
gene1532	Chr1	COG3008	Paraquat-inducible protein b	Function unknown	S	POORLY CHARACTERIZED
gene1534	Chr1	COG2996	S1 RNA binding domain protein	Function unknown	S	POORLY CHARACTERIZED
gene1535	Chr1	ENOG410Z3BT	-	Function unknown	S	POORLY CHARACTERIZED
gene1536	Chr1	ENOG4111RIS	-	Function unknown	S	POORLY CHARACTERIZED
gene1538	Chr1	COG1666	UPF0234 protein	Function unknown	S	POORLY CHARACTERIZED
gene1541	Chr1	COG4597	amino acid ABC transporter	Amino acid transport and metabolism	E	METABOLISM
gene1544	Chr1	COG0670	Membrane	Function unknown	S	POORLY CHARACTERIZED
gene1545	Chr1	COG2920	Part of a sulfur-relay system (By similarity)	Inorganic ion transport and metabolism	P	METABOLISM
gene1546	Chr1	COG1254	Acylphosphatase (EC 3.6.1.7)	Energy production and conversion	C	METABOLISM
gene1547	Chr1	ENOG410ZMEX	methyl-accepting chemotaxis protein	Function unknown	S	POORLY CHARACTERIZED
gene1553	Chr1	ENOG4112372	Protein of unknown function (DUF2750)	Function unknown	S	POORLY CHARACTERIZED
gene1555	Chr1	COG0603	Catalyzes the ATP-dependent conversion of 7-carboxy-7- deazaguanine (CDG) to 7-cyano-7-deazaguanine (preQ(0)) (By similarity)	Function unknown	S	POORLY CHARACTERIZED
gene1556	Chr1	COG0602	Catalyzes the conversion of 6-carboxy-5,6,7,8- tetrahydropterin (CPH4) to 7-carboxy-7-deazaguanine (CDG) (By similarity)	Post-translational modification, protein turnover, chaperones	O	CELLULAR PROCESSES AND SIGNALING
gene1559	Chr1	COG0454	acetyltransferase	Transcription	K	INFORMATION STORAGE AND PROCESSING
gene1836	Chr1	COG0454	acetyltransferase	Transcription	K	INFORMATION STORAGE AND PROCESSING
gene1567	Chr1	COG1897	Homoserine O-transsuccinylase	Amino acid transport and metabolism	E	METABOLISM
gene1568	Chr1	COG3063	type IV pilus biogenesis stability protein PilW	Cell motility; Intracellular trafficking, secretion, and vesicular transport	N;U	CELLULAR PROCESSES AND SIGNALING;CELLULAR PROCESSES AND SIGNALING
gene1569	Chr1	COG3129	Specifically methylates the adenine in position 1618 of 23S rRNA (By similarity)	Function unknown	S	POORLY CHARACTERIZED
gene1572	Chr1	COG0010	hydrolase activity, acting on carbon-nitrogen (but not peptide) bonds, in linear amidines	Amino acid transport and metabolism	E	METABOLISM
gene1609	Chr1	COG0010	hydrolase activity, acting on carbon-nitrogen (but not peptide) bonds, in linear amidines	Amino acid transport and metabolism	E	METABOLISM
gene1574	Chr1	ENOG410YUCG	Transcriptional regulator	Transcription	K	INFORMATION STORAGE AND PROCESSING
gene1575	Chr1	ENOG410XP8J	Major Facilitator Superfamily	Carbohydrate transport and metabolism	G	METABOLISM
gene1576	Chr1	COG3310	Protein of unknown function (DUF1415)	Function unknown	S	POORLY CHARACTERIZED
gene1577	Chr1	ENOG4111IH4	Phosphoribosyl-ATP pyrophosphohydrolase	Function unknown	S	POORLY CHARACTERIZED
gene1578	Chr1	ENOG411287Q	acetyltransferase	Function unknown	S	POORLY CHARACTERIZED
gene1579	Chr1	COG4138	Part of the ABC transporter complex BtuCDF involved in vitamin B12 import. Responsible for energy coupling to the transport system (By similarity)	Coenzyme transport and metabolism	H	METABOLISM
gene1580	Chr1	COG4139	Part of the ABC transporter complex BtuCDF involved in vitamin B12 import. Involved in the translocation of the substrate across the membrane (By similarity)	Coenzyme transport and metabolism	H	METABOLISM
gene1581	Chr1	COG2988	Transforms N(2)-succinylglutamate into succinate and glutamate (By similarity)	Amino acid transport and metabolism	E	METABOLISM
gene1582	Chr1	COG1164	Oligoendopeptidase f	Amino acid transport and metabolism	E	METABOLISM
gene1583	Chr1	COG0406	Phosphoglycerate mutase	Carbohydrate transport and metabolism	G	METABOLISM
gene1584	Chr1	COG2087	Adenosylcobinamide kinase	Coenzyme transport and metabolism	H	METABOLISM
gene1585	Chr1	COG0368	Joins Ado-cobinamide-GDP and alpha-ribazole to generate adenosylcobalamin (Ado-cobalamin) (By similarity)	Coenzyme transport and metabolism	H	METABOLISM
gene1586	Chr1	COG2038	Catalyzes the synthesis of alpha-ribazole-5'-phosphate from nicotinate mononucleotide (NAMN) and 5,6- dimethylbenzimidazole (DMB) (By similarity)	Coenzyme transport and metabolism	H	METABOLISM
gene1587	Chr1	COG1853	flavin reductase domain protein, FMN-binding	Function unknown	S	POORLY CHARACTERIZED
gene1591	Chr1	ENOG4111T63	endoribonuclease L-psp	Function unknown	S	POORLY CHARACTERIZED
gene1592	Chr1	COG2925	Exodeoxyribonuclease I	Replication, recombination and repair	L	INFORMATION STORAGE AND PROCESSING
gene1593	Chr1	COG1380	lrga family	Function unknown	S	POORLY CHARACTERIZED
gene1594	Chr1	COG1346	cytolysis	Cell wall/membrane/envelope biogenesis	M	CELLULAR PROCESSES AND SIGNALING
gene1595	Chr1	COG0295	cytidine deaminase	Nucleotide transport and metabolism	F	METABOLISM
gene1598	Chr1	ENOG4111F2V	sensor histidine kinase	Signal transduction mechanisms	T	CELLULAR PROCESSES AND SIGNALING
gene1600	Chr1	ENOG4111F2V	sensor histidine kinase	Signal transduction mechanisms	T	CELLULAR PROCESSES AND SIGNALING
gene1602	Chr1	COG0027	Catalyzes two reactions the first one is the production of beta-formyl glycinamide ribonucleotide (GAR) from formate, ATP and beta GAR	Nucleotide transport and metabolism	F	METABOLISM
gene1603	Chr1	ENOG4111GNF	Thiopurine S-methyltransferase	Function unknown	S	POORLY CHARACTERIZED
gene1604	Chr1	ENOG4111J6A	Region found in RelA / SpoT proteins	Function unknown	S	POORLY CHARACTERIZED
gene1605	Chr1	ENOG4111VQS	Protein of unknown function (DUF3187)	Function unknown	S	POORLY CHARACTERIZED
gene1608	Chr1	COG1228	amidohydrolase	Secondary metabolites biosynthesis, transport and catabolism	Q	METABOLISM
gene1610	Chr1	COG2987	Urocanate hydratase	Amino acid transport and metabolism	E	METABOLISM
gene1611	Chr1	COG2986	histidine ammonia-lyase	Amino acid transport and metabolism	E	METABOLISM
gene1612	Chr1	ENOG4111HP1	Protein of unknown function (DUF3581)	Function unknown	S	POORLY CHARACTERIZED
gene1613	Chr1	COG4161	arginine-importing ATPase activity	Amino acid transport and metabolism	E	METABOLISM
gene1614	Chr1	ENOG4111N5X	arginine ABC transporter, periplasmic arginine-binding protein	Amino acid transport and metabolism	E	METABOLISM
gene1617	Chr1	ENOG410XPU8	PAS fold	Signal transduction mechanisms	T	CELLULAR PROCESSES AND SIGNALING
gene1625	Chr1	ENOG410YWPT	-	Function unknown	S	POORLY CHARACTERIZED
gene1626	Chr1	ENOG410ZDB7	-	Function unknown	S	POORLY CHARACTERIZED
gene1629	Chr1	COG2020	isoprenylcysteine carboxyl methyltransferase	Post-translational modification, protein turnover, chaperones	O	CELLULAR PROCESSES AND SIGNALING
gene1630	Chr1	COG0247	domain protein	Energy production and conversion	C	METABOLISM
gene1631	Chr1	ENOG410YW2H	Protein of unknown function (DUF3334)	Function unknown	S	POORLY CHARACTERIZED
gene1632	Chr1	ENOG4111VG5	Protein of unknown function (DUF2786)	Function unknown	S	POORLY CHARACTERIZED
gene1726	Chr1	COG2214	DNAj domain protein	Post-translational modification, protein turnover, chaperones	O	CELLULAR PROCESSES AND SIGNALING
gene1637	Chr1	COG0179	Fumarylacetoacetate hydrolase	Secondary metabolites biosynthesis, transport and catabolism	Q	METABOLISM
gene1638	Chr1	COG3508	homogentisate 1,2-dioxygenase activity	Secondary metabolites biosynthesis, transport and catabolism	Q	METABOLISM
gene1639	Chr1	COG3185	4-Hydroxyphenylpyruvate dioxygenase	Amino acid transport and metabolism	E	METABOLISM
gene1643	Chr1	ENOG410XPHF	Efflux transporter rnd family, mfp subunit	Inorganic ion transport and metabolism	P	METABOLISM
gene1644	Chr1	COG3696	Heavy metal efflux pump, CzcA	Inorganic ion transport and metabolism	P	METABOLISM
gene1645	Chr1	COG4454	blue (type 1) copper domain protein	Inorganic ion transport and metabolism	P	METABOLISM
gene1646	Chr1	ENOG4111JCZ	Lactoylglutathione lyase	Function unknown	S	POORLY CHARACTERIZED
gene1648	Chr1	COG3070	TfoX domain-containing protein	Transcription	K	INFORMATION STORAGE AND PROCESSING
gene2029	Chr1	COG3070	TfoX domain-containing protein	Transcription	K	INFORMATION STORAGE AND PROCESSING
gene1649	Chr1	COG1639	HDOD domain	Signal transduction mechanisms	T	CELLULAR PROCESSES AND SIGNALING
gene1650	Chr1	COG2431	membrAne	Function unknown	S	POORLY CHARACTERIZED
gene1657	Chr1	COG2985	transport protein	Inorganic ion transport and metabolism	P	METABOLISM
gene1658	Chr1	COG0620	Catalyzes the transfer of a methyl group from 5- methyltetrahydrofolate to homocysteine resulting in methionine formation (By similarity)	Amino acid transport and metabolism	E	METABOLISM
gene1659	Chr1	ENOG410XQG7	Transcriptional regulator	Transcription	K	INFORMATION STORAGE AND PROCESSING
gene1660	Chr1	ENOG410XVT5	-	Function unknown	S	POORLY CHARACTERIZED
gene2244	Chr1	ENOG410XVT5	-	Function unknown	S	POORLY CHARACTERIZED
gene1661	Chr1	ENOG410Y3IP	-	Function unknown	S	POORLY CHARACTERIZED
gene1662	Chr1	COG1032	radical SAM domain protein	Energy production and conversion	C	METABOLISM
gene1663	Chr1	COG1932	Catalyzes the reversible conversion of 3- phosphohydroxypyruvate to phosphoserine and of 3-hydroxy-2-oxo-4- phosphonooxybutanoate to phosphohydroxythreonine (By similarity)	Amino acid transport and metabolism	E	METABOLISM
gene1664	Chr1	COG5339	GTP-Binding protein	Function unknown	S	POORLY CHARACTERIZED
gene1667	Chr1	ENOG41129JZ	-	Function unknown	S	POORLY CHARACTERIZED
gene1670	Chr1	ENOG41129RG	Protein with unknown function (DUF469)	Function unknown	S	POORLY CHARACTERIZED
gene1673	Chr1	COG2317	Carboxypeptidase	Amino acid transport and metabolism	E	METABOLISM
gene1674	Chr1	ENOG4112BM9	-	Function unknown	S	POORLY CHARACTERIZED
gene1765	Chr1	ENOG4112BM9	-	Function unknown	S	POORLY CHARACTERIZED
gene1676	Chr1	COG1574	amidohydrolase	Function unknown	S	POORLY CHARACTERIZED
gene1799	Chr1	COG1574	amidohydrolase	Function unknown	S	POORLY CHARACTERIZED
gene1679	Chr1	COG3979	chitinase	Carbohydrate transport and metabolism	G	METABOLISM
gene1682	Chr1	ENOG410XP4A	domain protein	Function unknown	S	POORLY CHARACTERIZED
gene1689	Chr1	ENOG410YAJW	-	Function unknown	S	POORLY CHARACTERIZED
gene1692	Chr1	ENOG410ZAJF	-	Function unknown	S	POORLY CHARACTERIZED
gene1700	Chr1	COG2963	transposase	Replication, recombination and repair	L	INFORMATION STORAGE AND PROCESSING
gene2684	Chr1	COG2963	transposase	Replication, recombination and repair	L	INFORMATION STORAGE AND PROCESSING
gene1701	Chr1	COG2801	Retrotransposon protein	Replication, recombination and repair	L	INFORMATION STORAGE AND PROCESSING
gene1704	Chr1	COG1835	Acyltransferase	Lipid transport and metabolism	I	METABOLISM
gene1706	Chr1	ENOG4111WA2	lipase class 3	Function unknown	S	POORLY CHARACTERIZED
gene1707	Chr1	ENOG410Z9CP	Methyltransferase, type	Function unknown	S	POORLY CHARACTERIZED
gene1709	Chr1	ENOG410XS19	Chitodextrinase	Function unknown	S	POORLY CHARACTERIZED
gene1710	Chr1	ENOG410XRJG	Transcriptional regulator	Transcription	K	INFORMATION STORAGE AND PROCESSING
gene1712	Chr1	COG0154	Allows the formation of correctly charged Gln-tRNA(Gln) through the transamidation of misacylated Glu-tRNA(Gln) in organisms which lack glutaminyl-tRNA synthetase. The reaction takes place in the presence of glutamine and ATP through an activated gamma-phospho-Glu-tRNA(Gln) (By similarity)	Translation, ribosomal structure and biogenesis	J	INFORMATION STORAGE AND PROCESSING
gene1717	Chr1	ENOG410Z0FJ	-	Function unknown	S	POORLY CHARACTERIZED
gene1718	Chr1	COG0775	Catalyzes the irreversible cleavage of the glycosidic bond in both 5'-methylthioadenosine (MTA) and S- adenosylhomocysteine (SAH AdoHcy) to adenine and the corresponding thioribose, 5'-methylthioribose and S-ribosylhomocysteine, respectively (By similarity)	Nucleotide transport and metabolism	F	METABOLISM
gene2509	Chr1	COG0775	Catalyzes the irreversible cleavage of the glycosidic bond in both 5'-methylthioadenosine (MTA) and S- adenosylhomocysteine (SAH AdoHcy) to adenine and the corresponding thioribose, 5'-methylthioribose and S-ribosylhomocysteine, respectively (By similarity)	Nucleotide transport and metabolism	F	METABOLISM
gene1719	Chr1	ENOG410XYKS	Morn repeat-containing protein	Function unknown	S	POORLY CHARACTERIZED
gene1721	Chr1	ENOG410XSIT	Short-chain dehydrogenase reductase Sdr	Function unknown	S	POORLY CHARACTERIZED
gene1722	Chr1	COG0701	Predicted permease	Function unknown	S	POORLY CHARACTERIZED
gene1723	Chr1	COG2262	GTPase that associates with the 50S ribosomal subunit and may have a role during protein synthesis or ribosome biogenesis (By similarity)	Function unknown	S	POORLY CHARACTERIZED
gene2766	Chr1	COG2262	GTPase that associates with the 50S ribosomal subunit and may have a role during protein synthesis or ribosome biogenesis (By similarity)	Function unknown	S	POORLY CHARACTERIZED
gene1727	Chr1	COG0183	acetyl-coa acetyltransferase	Lipid transport and metabolism	I	METABOLISM
gene2080	Chr1	COG0183	acetyl-coa acetyltransferase	Lipid transport and metabolism	I	METABOLISM
gene3059	Chr1	COG0183	acetyl-coa acetyltransferase	Lipid transport and metabolism	I	METABOLISM
gene1730	Chr1	COG4670	CoA transferase having broad substrate specificity for short-chain acyl-CoA thioesters with the activity decreasing when the length of the carboxylic acid chain exceeds four carbons (By similarity)	Lipid transport and metabolism	I	METABOLISM
gene1731	Chr1	COG2030	maoc domain protein dehydratase	Lipid transport and metabolism	I	METABOLISM
gene1732	Chr1	COG3007	reductase (By	Function unknown	S	POORLY CHARACTERIZED
gene1943	Chr1	COG3007	reductase (By	Function unknown	S	POORLY CHARACTERIZED
gene1734	Chr1	COG0657	alpha beta hydrolase fold-3 domain protein	Lipid transport and metabolism	I	METABOLISM
gene1735	Chr1	ENOG41124NU	-	Function unknown	S	POORLY CHARACTERIZED
gene1737	Chr1	COG2837	peroxidase	Inorganic ion transport and metabolism	P	METABOLISM
gene2169	Chr1	COG2837	peroxidase	Inorganic ion transport and metabolism	P	METABOLISM
gene1739	Chr1	ENOG4111U2E	HNH endonuclease	Defense mechanisms	V	CELLULAR PROCESSES AND SIGNALING
gene1740	Chr1	ENOG410ZANX	-	Function unknown	S	POORLY CHARACTERIZED
gene1741	Chr1	COG2015	Beta-lactamase domain protein	Secondary metabolites biosynthesis, transport and catabolism	Q	METABOLISM
gene1748	Chr1	COG2149	Membrane	Function unknown	S	POORLY CHARACTERIZED
gene1753	Chr1	ENOG4111HBV	Methyltransferase domain	Function unknown	S	POORLY CHARACTERIZED
gene1759	Chr1	ENOG4111PDX	-	Function unknown	S	POORLY CHARACTERIZED
gene1764	Chr1	ENOG4111S10	-	Function unknown	S	POORLY CHARACTERIZED
gene1766	Chr1	COG3250	hydrolase family 2	Carbohydrate transport and metabolism	G	METABOLISM
gene1771	Chr1	COG1988	Membrane-bound metal-dependent hydrolase	Function unknown	S	POORLY CHARACTERIZED
gene1772	Chr1	ENOG4111SGJ	alpha beta hydrolase fold	Function unknown	S	POORLY CHARACTERIZED
gene1775	Chr1	ENOG411289U	Protein of unknown function (DUF2971)	Function unknown	S	POORLY CHARACTERIZED
gene1779	Chr1	COG0714	ATPase activity	Function unknown	S	POORLY CHARACTERIZED
gene1780	Chr1	ENOG410XSQB	VWA-like domain (DUF2201)	Function unknown	S	POORLY CHARACTERIZED
gene1782	Chr1	ENOG410XY6U	Leucine-rich repeat-containing protein	Function unknown	S	POORLY CHARACTERIZED
gene1784	Chr1	ENOG4111V4D	-	Function unknown	S	POORLY CHARACTERIZED
gene1786	Chr1	ENOG4111V4D	-	Function unknown	S	POORLY CHARACTERIZED
gene1785	Chr1	COG1704	LemA family	Function unknown	S	POORLY CHARACTERIZED
gene1792	Chr1	COG1292	Transporter	Inorganic ion transport and metabolism	P	METABOLISM
gene2056	Chr1	COG1292	Transporter	Inorganic ion transport and metabolism	P	METABOLISM
gene1793	Chr1	COG2355	Dipeptidase	Amino acid transport and metabolism	E	METABOLISM
gene1796	Chr1	ENOG410XRIM	LysR family (Transcriptional regulator	Transcription	K	INFORMATION STORAGE AND PROCESSING
gene1803	Chr1	ENOG410ZRDB	Methyl-accepting chemotaxis sensory transducer	Function unknown	S	POORLY CHARACTERIZED
gene1804	Chr1	ENOG410XTQI	-	Function unknown	S	POORLY CHARACTERIZED
gene1806	Chr1	COG3059	Inner membrane protein YkgB	Function unknown	S	POORLY CHARACTERIZED
gene1809	Chr1	COG3247	response to pH	Function unknown	S	POORLY CHARACTERIZED
gene1818	Chr1	ENOG411228N	PAAR repeat-containing protein	Function unknown	S	POORLY CHARACTERIZED
gene1821	Chr1	ENOG411228N	PAAR repeat-containing protein	Function unknown	S	POORLY CHARACTERIZED
gene1828	Chr1	ENOG411228N	PAAR repeat-containing protein	Function unknown	S	POORLY CHARACTERIZED
gene1822	Chr1	ENOG410YK5V	-	Function unknown	S	POORLY CHARACTERIZED
gene1830	Chr1	ENOG410YK5V	-	Function unknown	S	POORLY CHARACTERIZED
gene1832	Chr1	ENOG410YST4	-	Function unknown	S	POORLY CHARACTERIZED
gene1835	Chr1	COG0016	phenylalanyL-tRNA synthetase, alpha subunit	Translation, ribosomal structure and biogenesis	J	INFORMATION STORAGE AND PROCESSING
gene1838	Chr1	ENOG410Y1GF	-	Function unknown	S	POORLY CHARACTERIZED
gene1839	Chr1	ENOG410XQME	outer membrane lipoprotein-sorting protein	Function unknown	S	POORLY CHARACTERIZED
gene1840	Chr1	COG1033	RND superfamily	Function unknown	S	POORLY CHARACTERIZED
gene1841	Chr1	ENOG4111GXS	Transcriptional regulator	Transcription	K	INFORMATION STORAGE AND PROCESSING
gene1848	Chr1	COG0558	cdp-diacylglycerol-glycerol-3-phosphate 3-phosphatidyltransferase	Lipid transport and metabolism	I	METABOLISM
gene1872	Chr1	COG0558	cdp-diacylglycerol-glycerol-3-phosphate 3-phosphatidyltransferase	Lipid transport and metabolism	I	METABOLISM
gene1849	Chr1	COG0322	The UvrABC repair system catalyzes the recognition and processing of DNA lesions. UvrC both incises the 5' and 3' sides of the lesion. The N-terminal half is responsible for the 3' incision and the C-terminal half is responsible for the 5' incision (By similarity)	Replication, recombination and repair	L	INFORMATION STORAGE AND PROCESSING
gene1851	Chr1	ENOG4111N2Q	Protein of unknown function (DUF3015)	Function unknown	S	POORLY CHARACTERIZED
gene1852	Chr1	ENOG410XR8J	-	Function unknown	S	POORLY CHARACTERIZED
gene1853	Chr1	COG0417	DNA polymerase	Replication, recombination and repair	L	INFORMATION STORAGE AND PROCESSING
gene1855	Chr1	ENOG410YZ6Y	-	Function unknown	S	POORLY CHARACTERIZED
gene1856	Chr1	COG0231	Involved in peptide bond synthesis. Stimulates efficient translation and peptide-bond synthesis on native or reconstituted 70S ribosomes in vitro. Probably functions indirectly by altering the affinity of the ribosome for aminoacyl-tRNA, thus increasing their reactivity as acceptors for peptidyl transferase (By similarity)	Translation, ribosomal structure and biogenesis	J	INFORMATION STORAGE AND PROCESSING
gene2819	Chr1	COG0231	Involved in peptide bond synthesis. Stimulates efficient translation and peptide-bond synthesis on native or reconstituted 70S ribosomes in vitro. Probably functions indirectly by altering the affinity of the ribosome for aminoacyl-tRNA, thus increasing their reactivity as acceptors for peptidyl transferase (By similarity)	Translation, ribosomal structure and biogenesis	J	INFORMATION STORAGE AND PROCESSING
gene1857	Chr1	COG3099	UPF0263 protein	Function unknown	S	POORLY CHARACTERIZED
gene1861	Chr1	COG2917	probably involved in intracellular septation (By similarity)	Cell cycle control, cell division, chromosome partitioning	D	CELLULAR PROCESSES AND SIGNALING
gene1862	Chr1	COG1607	thioesterase Superfamily protein	Lipid transport and metabolism	I	METABOLISM
gene1863	Chr1	COG2350	YciI-Like Protein	Function unknown	S	POORLY CHARACTERIZED
gene1867	Chr1	COG3313	Fe-S protein	Function unknown	S	POORLY CHARACTERIZED
gene1868	Chr1	COG3187	Heat shock protein HslJ	Post-translational modification, protein turnover, chaperones	O	CELLULAR PROCESSES AND SIGNALING
gene1869	Chr1	COG4134	solute-binding protein	Function unknown	S	POORLY CHARACTERIZED
gene1870	Chr1	COG4135	ABC transporter (permease)	Function unknown	S	POORLY CHARACTERIZED
gene1871	Chr1	COG4136	ABC transporter, ATP-binding protein	Function unknown	S	POORLY CHARACTERIZED
gene1874	Chr1	COG3594	Acyltransferase	Carbohydrate transport and metabolism	G	METABOLISM
gene1886	Chr1	COG1983	phage shock protein C	Function unknown	S	POORLY CHARACTERIZED
gene1887	Chr1	ENOG41123WF	phage shock protein B	Function unknown	S	POORLY CHARACTERIZED
gene1888	Chr1	COG1842	Phage shock protein A	Transcription; Signal transduction mechanisms	K;T	INFORMATION STORAGE AND PROCESSING;CELLULAR PROCESSES AND SIGNALING
gene1889	Chr1	COG1221	transcriptional	Transcription	K	INFORMATION STORAGE AND PROCESSING
gene2465	Chr1	COG1221	transcriptional	Transcription	K	INFORMATION STORAGE AND PROCESSING
gene1891	Chr1	COG4168	peptide transport system, permease protein	Defense mechanisms	V	CELLULAR PROCESSES AND SIGNALING
gene1892	Chr1	COG4171	peptide transport system permease protein	Defense mechanisms	V	CELLULAR PROCESSES AND SIGNALING
gene1893	Chr1	COG4170	atp-binding protein	Defense mechanisms	V	CELLULAR PROCESSES AND SIGNALING
gene1894	Chr1	COG4167	peptide transport system atp-binding protein	Defense mechanisms	V	CELLULAR PROCESSES AND SIGNALING
gene1895	Chr1	COG1227	Manganese-dependent inorganic pyrophosphatase	Energy production and conversion	C	METABOLISM
gene1896	Chr1	ENOG410YVFY	Manganese transporter 11 TMS	Function unknown	S	POORLY CHARACTERIZED
gene1898	Chr1	COG0139	Phosphoribosyl-amp cyclohydrolase	Amino acid transport and metabolism	E	METABOLISM
gene1899	Chr1	COG0107	IGPS catalyzes the conversion of PRFAR and glutamine to IGP, AICAR and glutamate. The HisF subunit catalyzes the cyclization activity that produces IGP and AICAR from PRFAR using the ammonia provided by the HisH subunit (By similarity)	Amino acid transport and metabolism	E	METABOLISM
gene1900	Chr1	COG0106	phosphoribosylformimino-5-aminoimidazole carboxamide ribotide isomerase	Amino acid transport and metabolism	E	METABOLISM
gene1901	Chr1	COG0118	IGPS catalyzes the conversion of PRFAR and glutamine to IGP, AICAR and glutamate. The hisH subunit provides the glutamine amidotransferase activity that produces the ammonia necessary to hisF for the synthesis of IGP and AICAR (By similarity)	Amino acid transport and metabolism	E	METABOLISM
gene1903	Chr1	COG0079	Imidazole acetol-phosphate transaminase	Amino acid transport and metabolism	E	METABOLISM
gene1904	Chr1	COG0141	Catalyzes the sequential NAD-dependent oxidations of L- histidinol to L-histidinaldehyde and then to L-histidine (By similarity)	Amino acid transport and metabolism	E	METABOLISM
gene1905	Chr1	COG0040	Catalyzes the condensation of ATP and 5-phosphoribose 1- diphosphate to form N'-(5'-phosphoribosyl)-ATP (PR-ATP). Has a crucial role in the pathway because the rate of histidine biosynthesis seems to be controlled primarily by regulation of HisG enzymatic activity (By similarity)	Amino acid transport and metabolism	E	METABOLISM
gene1907	Chr1	COG2916	histone family protein nucleoid-structuring protein h-ns	Function unknown	S	POORLY CHARACTERIZED
gene1911	Chr1	ENOG41128JV	-	Function unknown	S	POORLY CHARACTERIZED
gene1912	Chr1	COG0482	Catalyzes the 2-thiolation of uridine at the wobble position (U34) of tRNA, leading to the formation of s(2)U34 (By similarity)	Translation, ribosomal structure and biogenesis	J	INFORMATION STORAGE AND PROCESSING
gene1913	Chr1	COG2915	High frequency lysogenization protein HflD homolog	Function unknown	S	POORLY CHARACTERIZED
gene1914	Chr1	COG0015	adenylosuccinate lyase	Nucleotide transport and metabolism	F	METABOLISM
gene1915	Chr1	ENOG4111PDV	(Lipo)protein	Function unknown	S	POORLY CHARACTERIZED
gene1916	Chr1	ENOG4111WAP	-	Function unknown	S	POORLY CHARACTERIZED
gene1918	Chr1	COG2230	cyclopropane-fatty-acyl-phospholipid synthase	Cell wall/membrane/envelope biogenesis	M	CELLULAR PROCESSES AND SIGNALING
gene1919	Chr1	COG3496	plasmid partition ParA protein	Function unknown	S	POORLY CHARACTERIZED
gene1920	Chr1	COG2907	amine oxidase	Function unknown	S	POORLY CHARACTERIZED
gene1922	Chr1	ENOG4111TV5	Transcriptional regulator	Transcription	K	INFORMATION STORAGE AND PROCESSING
gene1923	Chr1	COG0501	Protease HtpX homolog	Post-translational modification, protein turnover, chaperones	O	CELLULAR PROCESSES AND SIGNALING
gene1925	Chr1	COG0132	Catalyzes a mechanistically unusual reaction, the ATP- dependent insertion of CO2 between the N7 and N8 nitrogen atoms of 7,8-diaminopelargonic acid (DAPA) to form an ureido ring (By similarity)	Coenzyme transport and metabolism	H	METABOLISM
gene1927	Chr1	COG0156	8-Amino-7-oxononanoate synthase	Coenzyme transport and metabolism	H	METABOLISM
gene1928	Chr1	COG0502	Catalyzes the conversion of dethiobiotin (DTB) to biotin by the insertion of a sulfur atom into dethiobiotin via a radical- based mechanism (By similarity)	Coenzyme transport and metabolism	H	METABOLISM
gene1929	Chr1	COG0161	Catalyzes the transfer of the alpha-amino group from S- adenosyl-L-methionine (SAM) to 7-keto-8-aminopelargonic acid (KAPA) to form 7,8-diaminopelargonic acid (DAPA). It is the only animotransferase known to utilize SAM as an amino donor (By similarity)	Amino acid transport and metabolism	E	METABOLISM
gene1931	Chr1	ENOG4112BP5	porin-like protein H	Cell wall/membrane/envelope biogenesis	M	CELLULAR PROCESSES AND SIGNALING
gene1936	Chr1	ENOG41122N8	primosomal replication protein n''	Replication, recombination and repair	L	INFORMATION STORAGE AND PROCESSING
gene1937	Chr1	ENOG410XUBV	Protein of unknown function (DUF2496)	Function unknown	S	POORLY CHARACTERIZED
gene1938	Chr1	COG2850	Cupin 4 family protein	Function unknown	S	POORLY CHARACTERIZED
gene1939	Chr1	COG0708	Exodeoxyribonuclease III	Replication, recombination and repair	L	INFORMATION STORAGE AND PROCESSING
gene1940	Chr1	COG4618	ABC transporter	Defense mechanisms	V	CELLULAR PROCESSES AND SIGNALING
gene1941	Chr1	ENOG410XNME	Type I secretion membrane fusion protein (HlyD	Intracellular trafficking, secretion, and vesicular transport	U	CELLULAR PROCESSES AND SIGNALING
gene1947	Chr1	COG1807	glycosyl transferase, family 39	Cell wall/membrane/envelope biogenesis	M	CELLULAR PROCESSES AND SIGNALING
gene1951	Chr1	COG2515	1-aminocyclopropane-1-carboxylate deaminase	Amino acid transport and metabolism	E	METABOLISM
gene1952	Chr1	ENOG410XXA5	Protein of unknown function (DUF1496)	Function unknown	S	POORLY CHARACTERIZED
gene1953	Chr1	COG1858	cytochrome C peroxidase	Inorganic ion transport and metabolism	P	METABOLISM
gene1957	Chr1	COG3157	type VI secretion system effector, hcp1 family	Function unknown	S	POORLY CHARACTERIZED
gene1962	Chr1	COG5413	Membrane	Function unknown	S	POORLY CHARACTERIZED
gene1964	Chr1	ENOG410XNNM	zinc finger domain	Function unknown	S	POORLY CHARACTERIZED
gene1965	Chr1	COG4260	virion core protein (Lumpy skin disease	Function unknown	S	POORLY CHARACTERIZED
gene1967	Chr1	ENOG410XSGE	Methyltransferase, type	Function unknown	S	POORLY CHARACTERIZED
gene1969	Chr1	ENOG410XZSJ	-	Function unknown	S	POORLY CHARACTERIZED
gene1970	Chr1	ENOG410Y8NT	-	Function unknown	S	POORLY CHARACTERIZED
gene1971	Chr1	ENOG4111PVG	-	Function unknown	S	POORLY CHARACTERIZED
gene1972	Chr1	ENOG4112CUD	-	Function unknown	S	POORLY CHARACTERIZED
gene1973	Chr1	COG2378	Transcriptional regulator	Transcription	K	INFORMATION STORAGE AND PROCESSING
gene1975	Chr1	ENOG4111J5P	Exports L-alanine (By similarity)	Intracellular trafficking, secretion, and vesicular transport	U	CELLULAR PROCESSES AND SIGNALING
gene1979	Chr1	COG0379	Catalyzes the condensation of iminoaspartate with dihydroxyacetone phosphate to form quinolinate (By similarity)	Coenzyme transport and metabolism	H	METABOLISM
gene1980	Chr1	COG1729	tol-Pal system protein YbgF	Function unknown	S	POORLY CHARACTERIZED
gene1982	Chr1	COG0823	Involved in the TonB-independent uptake of proteins (By similarity)	Intracellular trafficking, secretion, and vesicular transport	U	CELLULAR PROCESSES AND SIGNALING
gene1983	Chr1	COG3064	Cell envelope integrity inner membrane protein TolA	Cell wall/membrane/envelope biogenesis	M	CELLULAR PROCESSES AND SIGNALING
gene1986	Chr1	COG0824	Thioesterase	Function unknown	S	POORLY CHARACTERIZED
gene1987	Chr1	COG3790	cyd operon protein YbgE	Function unknown	S	POORLY CHARACTERIZED
gene1988	Chr1	COG1294	oxidoreductase activity, acting on diphenols and related substances as donors, oxygen as acceptor	Energy production and conversion	C	METABOLISM
gene1989	Chr1	COG1271	(Ubiquinol oxidase) subunit I	Energy production and conversion	C	METABOLISM
gene1990	Chr1	COG2255	The RuvA-RuvB complex in the presence of ATP renatures cruciform structure in supercoiled DNA with palindromic sequence, indicating that it may promote strand exchange reactions in homologous recombination. RuvAB is a helicase that mediates the Holliday junction migration by localized denaturation and reannealing (By similarity)	Replication, recombination and repair	L	INFORMATION STORAGE AND PROCESSING
gene1991	Chr1	COG0632	The RuvA-RuvB complex in the presence of ATP renatures cruciform structure in supercoiled DNA with palindromic sequence, indicating that it may promote strand exchange reactions in homologous recombination. RuvAB is a helicase that mediates the Holliday junction migration by localized denaturation and reannealing. RuvA stimulates, in the presence of DNA, the weak ATPase activity of RuvB (By simil…	Replication, recombination and repair	L	INFORMATION STORAGE AND PROCESSING
gene1992	Chr1	COG0817	Nuclease that resolves Holliday junction intermediates in genetic recombination. Cleaves the cruciform structure in supercoiled DNA by nicking to strands with the same polarity at sites symmetrically opposed at the junction in the homologous arms and leaves a 5'-terminal phosphate and a 3'-terminal hydroxyl group (By similarity)	Replication, recombination and repair	L	INFORMATION STORAGE AND PROCESSING
gene1993	Chr1	COG3345	alpha-galactosidase	Carbohydrate transport and metabolism	G	METABOLISM
gene1995	Chr1	COG3005	Cytochrome	Energy production and conversion	C	METABOLISM
gene1996	Chr1	COG4459	periplasmic nitrate reductase	Energy production and conversion	C	METABOLISM
gene1997	Chr1	COG0390	(ABC) transporter	Function unknown	S	POORLY CHARACTERIZED
gene1999	Chr1	COG2116	formate transmembrane transporter activity	Inorganic ion transport and metabolism	P	METABOLISM
gene2001	Chr1	ENOG411281A	DNA-binding protein inhibitor Id-2-related protein	Function unknown	S	POORLY CHARACTERIZED
gene2002	Chr1	COG4125	transmembrane pair domain-containing protein	Function unknown	S	POORLY CHARACTERIZED
gene2003	Chr1	ENOG410XPIV	LysR family Transcriptional regulator	Transcription	K	INFORMATION STORAGE AND PROCESSING
gene2005	Chr1	COG1434	conserved protein	Function unknown	S	POORLY CHARACTERIZED
gene2025	Chr1	COG1434	conserved protein	Function unknown	S	POORLY CHARACTERIZED
gene2007	Chr1	COG2127	protein catabolic process	Post-translational modification, protein turnover, chaperones	O	CELLULAR PROCESSES AND SIGNALING
gene2009	Chr1	COG2838	Isocitrate dehydrogenase	Energy production and conversion	C	METABOLISM
gene2012	Chr1	COG4232	Required to facilitate the formation of correct disulfide bonds in some periplasmic proteins and for the assembly of the periplasmic c-type cytochromes. Acts by transferring electrons from cytoplasmic thioredoxin to the periplasm. This transfer involves a cascade of disulfide bond formation and reduction steps (By similarity)	Post-translational modification, protein turnover, chaperones	O	CELLULAR PROCESSES AND SIGNALING
gene2834	Chr1	COG4232	Required to facilitate the formation of correct disulfide bonds in some periplasmic proteins and for the assembly of the periplasmic c-type cytochromes. Acts by transferring electrons from cytoplasmic thioredoxin to the periplasm. This transfer involves a cascade of disulfide bond formation and reduction steps (By similarity)	Post-translational modification, protein turnover, chaperones	O	CELLULAR PROCESSES AND SIGNALING
gene2014	Chr1	COG0173	aspartyl-trna synthetase	Translation, ribosomal structure and biogenesis	J	INFORMATION STORAGE AND PROCESSING
gene2015	Chr1	COG1801	conserved protein	Function unknown	S	POORLY CHARACTERIZED
gene2019	Chr1	ENOG410YJEW	Gonadoliberin III-related protein	Function unknown	S	POORLY CHARACTERIZED
gene2020	Chr1	ENOG410XNRP	alpha-l-glutamate ligase-like protein	Function unknown	S	POORLY CHARACTERIZED
gene2021	Chr1	COG3096	Plays a central role in chromosome condensation, segregation and cell cycle progression. Functions as a homodimer, which is essential for chromosome partition. Involved in negative DNA supercoiling in vivo, and by this means organize and compact chromosomes. May achieve or facilitate chromosome segregation by condensation DNA from both sides of a centrally located replisome during cell division (…	Cell cycle control, cell division, chromosome partitioning	D	CELLULAR PROCESSES AND SIGNALING
gene2022	Chr1	COG3095	Involved in chromosome condensation, segregation and cell cycle progression. May participate in facilitating chromosome segregation by condensation DNA from both sides of a centrally located replisome during cell division. Probably acts via its interaction with MukB and MukF (By similarity)	Cell cycle control, cell division, chromosome partitioning	D	CELLULAR PROCESSES AND SIGNALING
gene2023	Chr1	COG3006	Involved in chromosome condensation, segregation and cell cycle progression. May participate in facilitating chromosome segregation by condensation DNA from both sides of a centrally located replisome during cell division. Not required for mini-F plasmid partitioning. Probably acts via its interaction with MukB and MukE. Overexpression results in anucleate cells. It has a calcium binding activity…	Cell cycle control, cell division, chromosome partitioning	D	CELLULAR PROCESSES AND SIGNALING
gene2030	Chr1	COG0398	Snare associated golgi protein	Function unknown	S	POORLY CHARACTERIZED
gene2031	Chr1	ENOG410XY4I	-	Function unknown	S	POORLY CHARACTERIZED
gene2033	Chr1	COG0297	starch synthase activity	Carbohydrate transport and metabolism	G	METABOLISM
gene2034	Chr1	COG0448	Catalyzes the synthesis of ADP-glucose, a sugar donor used in elongation reactions on alpha-glucans (By similarity)	Carbohydrate transport and metabolism	G	METABOLISM
gene2036	Chr1	ENOG41124Y2	Protein of unknown function (DUF2498)	Function unknown	S	POORLY CHARACTERIZED
gene2037	Chr1	COG0128	5-enolpyruvylshikimate-3-phosphate synthase	Amino acid transport and metabolism	E	METABOLISM
gene2038	Chr1	ENOG4111XR5	Membrane	Cell wall/membrane/envelope biogenesis	M	CELLULAR PROCESSES AND SIGNALING
gene2039	Chr1	COG2360	Functions in the N-end rule pathway of protein degradation where it conjugates Leu, Phe and, less efficiently, Met from aminoacyl-tRNAs to the N-termini of proteins containing an N-terminal arginine or lysine (By similarity)	Post-translational modification, protein turnover, chaperones	O	CELLULAR PROCESSES AND SIGNALING
gene2040	Chr1	COG2360	Functions in the N-end rule pathway of protein degradation where it conjugates Leu, Phe and, less efficiently, Met from aminoacyl-tRNAs to the N-termini of proteins containing an N-terminal arginine or lysine (By similarity)	Post-translational modification, protein turnover, chaperones	O	CELLULAR PROCESSES AND SIGNALING
gene2041	Chr1	COG2935	May conjugate Arg from its aminoacyl-tRNA to the N- termini of proteins containing an N-terminal aspartate or glutamate	Post-translational modification, protein turnover, chaperones	O	CELLULAR PROCESSES AND SIGNALING
gene2042	Chr1	COG0361	however, it seems to stimulate more or less all the activities of the other two initiation factors, IF-2 and IF-3 (By similarity)	Translation, ribosomal structure and biogenesis	J	INFORMATION STORAGE AND PROCESSING
gene2043	Chr1	COG1435	THymidine Kinase	Nucleotide transport and metabolism	F	METABOLISM
gene2044	Chr1	COG0215	Cysteinyl-tRNA synthetase	Translation, ribosomal structure and biogenesis	J	INFORMATION STORAGE AND PROCESSING
gene2046	Chr1	COG2908	Catalyzes the hydrolysis of the pyrophosphate bond of UDP-2,3-diacylglucosamine to yield 2,3-diacylglucosamine 1- phosphate (lipid X) and UMP (By similarity)	Function unknown	S	POORLY CHARACTERIZED
gene2047	Chr1	COG3434	Diguanylate phosphodiesterase	Signal transduction mechanisms	T	CELLULAR PROCESSES AND SIGNALING
gene2919	Chr1	COG3434	Diguanylate phosphodiesterase	Signal transduction mechanisms	T	CELLULAR PROCESSES AND SIGNALING
gene2048	Chr1	COG3012	UPF0225 protein	Function unknown	S	POORLY CHARACTERIZED
gene2049	Chr1	COG3139	cytoplasmic protein	Function unknown	S	POORLY CHARACTERIZED
gene2051	Chr1	COG0229	)-reductase	Post-translational modification, protein turnover, chaperones	O	CELLULAR PROCESSES AND SIGNALING
gene2052	Chr1	COG0057	glyceraldehyde3phosphate dehydrogenase	Carbohydrate transport and metabolism	G	METABOLISM
gene2708	Chr1	COG0057	glyceraldehyde3phosphate dehydrogenase	Carbohydrate transport and metabolism	G	METABOLISM
gene2917	Chr1	COG0057	glyceraldehyde3phosphate dehydrogenase	Carbohydrate transport and metabolism	G	METABOLISM
gene2053	Chr1	COG0676	Aldose 1epimerase	Carbohydrate transport and metabolism	G	METABOLISM
gene2055	Chr1	ENOG410Z5X2	-	Function unknown	S	POORLY CHARACTERIZED
gene2057	Chr1	COG1785	alkaline phosphatase	Inorganic ion transport and metabolism	P	METABOLISM
gene2059	Chr1	COG2983	Pfam:UPF0153	Function unknown	S	POORLY CHARACTERIZED
gene2060	Chr1	COG2261	Transglycosylase-associated protein	Function unknown	S	POORLY CHARACTERIZED
gene2062	Chr1	COG0727	Fe-S-cluster oxidoreductase	Function unknown	S	POORLY CHARACTERIZED
gene2063	Chr1	ENOG410XNU1	Aldo keto reductase	Energy production and conversion	C	METABOLISM
gene2064	Chr1	COG4095	MtN3 and saliva related transmembrane protein	Function unknown	S	POORLY CHARACTERIZED
gene2065	Chr1	COG1486	glycoside hydrolase family 4	Carbohydrate transport and metabolism	G	METABOLISM
gene2585	Chr1	COG1486	glycoside hydrolase family 4	Carbohydrate transport and metabolism	G	METABOLISM
gene2068	Chr1	COG0580	Channel that permits osmotically driven movement of water in both directions. It is involved in the osmoregulation and in the maintenance of cell turgor during volume expansion in rapidly growing cells. It mediates rapid entry or exit of water in response to abrupt changes in osmolarity (By similarity)	Carbohydrate transport and metabolism	G	METABOLISM
gene2070	Chr1	COG0353	May play a role in DNA repair. It seems to be involved in an RecBC-independent recombinational process of DNA repair. It may act with RecF and RecO (By similarity)	Replication, recombination and repair	L	INFORMATION STORAGE AND PROCESSING
gene2071	Chr1	COG0718	Binds to DNA and alters its conformation. May be involved in regulation of gene expression, nucleoid organization and DNA protection (By similarity)	Function unknown	S	POORLY CHARACTERIZED
gene2072	Chr1	COG2812	dna polymerase iii subunits gamma and tau	Replication, recombination and repair	L	INFORMATION STORAGE AND PROCESSING
gene2074	Chr1	COG2832	inner membrane protein YbaN	Function unknown	S	POORLY CHARACTERIZED
gene2077	Chr1	ENOG4110V0Z	LysR family transcriptional Regulator	Transcription	K	INFORMATION STORAGE AND PROCESSING
gene2078	Chr1	COG0778	nitroreductase	Energy production and conversion	C	METABOLISM
gene2079	Chr1	COG1024	Enoyl-CoA hydratase	Lipid transport and metabolism	I	METABOLISM
gene3058	Chr1	COG1024	Enoyl-CoA hydratase	Lipid transport and metabolism	I	METABOLISM
gene2082	Chr1	ENOG4111V70	Protein of unknown function (DUF3379)	Function unknown	S	POORLY CHARACTERIZED
gene2083	Chr1	COG2067	lipid transport	Lipid transport and metabolism	I	METABOLISM
[truncated: 649 more rows]
